# Supplementary material for: Galactosyl and sialyl clusters: synthesis and evaluation against T. cruzi parasite
Source: publisher site journal article supplement (doi:10.1515/pac-2019-0216), 2019-05-15
Supplement: Supplementary file 1 [file pac-2019-0216_suppl.docx]

**Supplementary Information**

**Galactosyl and sialyl clusters: synthesis and evaluation against *T. cruzi* parasite**

Andreza S. Figueredo 1, Peterson de Andrade 1, Thalita B. Riul 1, Marcelo F. Marchiori 1, Thais Canassa De Leo 1, Anna Karoline A. Fleuri 1, Sérgio Schenkman 2, Marcelo D. Baruffi 1 and Ivone Carvalho 1

1 School of Pharmaceutical Sciences of Ribeirão Preto, University of São Paulo, Av. do Café s/n, Monte Alegre, Ribeirão Preto 14040-903, Brazil.

2 Federal University of São Paulo, Rua Pedro de Toledo 669 L6A 04039-032, São Paulo SP, Brazil.

*Corresponding author: [carronal@usp.br](mailto:*carronal@usp.br) (I. Carvalho); tel.: +551633154709

**Fig. S1.** 1H NMR spectrum of compound **6**.

**Fig. S2.** 13C NMR spectrum of compound **6**.

**Fig. S3.** ESI MS analysis of compound **6**.

**Fig. S4.** 1H NMR spectrum of compound **7**.

**Fig. S5.** 1H NMR spectrum of compound **8**.

**Fig. S6.** 1H NMR spectrum of compound **9**.

**Fig. S7.** 1H NMR spectrum of glycocluster **10**.

**Fig. S8.** 13C NMR spectrum of glycocluster **10**.

**Fig. S9.** ESI MS analysis of glycocluster **10**.

**Fig. S10.** 1H NMR spectrum of glycocluster **11**.

**Fig. S11.** 13C NMR spectrum of glycocluster **11**.

**Fig. S12.** ESI MS analysis of glycocluster **11**.

**Fig. S13.** 1H NMR spectrum of glycocluster **12**.

**Fig. S14.** 13C NMR spectrum of glycocluster **12**.

**Fig. S15.** ESI MS analysis of glycocluster **12**.

**Fig. S16.** 1H NMR spectrum of compound **13**.

**Fig. S17.** 13C NMR spectrum of compound **13**.

**Fig. S18.** ESI MS analysis of compound **13**.

**Fig. S19.** 1H NMR spectrum of compound **14**.

**Fig. S20.** 13C NMR spectrum of compound **14**.

**Fig. S21.** ESI MS analysis of compound **14**.

**Fig. S22.** 1H NMR spectrum of compound **15**.

**Fig. S23.** 13C NMR spectrum of compound **15.**

**Fig. S24.** ESI MS analysis of compound **15.**

**Fig. S25.** 1H NMR spectrum of compound **18**.

**Fig. S26 A.** 13C NMR spectrum of compound **18**.

**Fig. S26 B.** 13C NMR spectrum of compound **18** after deconvolution with Lorentzian shape with detection sensitivity set to 1.4 and peak overlapping factor of 0.5 ppm (Software: Bruker TopSpin 2.1).

**Fig. S27.** ESI MS analysis of compound **18**.

**Fig. S28.** 1H NMR spectrum of compound **19.**

**Fig. S29 A.** 13C NMR spectrum of compound **19.**

**Fig. S29 B.** 13C NMR spectrum of compound **19** after deconvolution with Lorentzian shape with detection sensitivity set to 1.4 and peak overlapping factor of 0.5 ppm (Software: Bruker TopSpin 2.1).

**Fig. S30.** ESI MS analysis of compound **19.**

**Fig. S31.** 1H NMR spectrum of glycocluster **21**.

**Fig. S32.** 13C NMR spectrum of glycocluster **21**.

**Fig. S33.** ESI MS analysis of glycocluster **21**.

**Fig. S34.** 1H NMR spectrum of compound **22**.

**Fig. S35 A.** 13C NMR spectrum of compound **22**.

**Fig. S35 B.** 13C NMR spectrum of compound **22** after deconvolution with Lorentzian shape with detection sensitivity set to 1.4 and peak overlapping factor of 0.5 ppm (Software: Bruker TopSpin 2.1).

**Fig. S36.** ESI MS analysis of compound **22**.

**Fig. S37.** 1H NMR spectrum of glycocluster **1**.

**Fig. S38.** ESI MS analysis of glycocluster **1**.

**Fig. S39.** 1H NMR spectrum of glycocluster **2**.

**Fig. S40.** ESI MS analysis of glycocluster **2**.

**Fig. S41.** 1H NMR spectrum of glycocluster **3**.

**Fig. S42.** ESI MS analysis of glycocluster **3**.

**Fig. S43.** 1H NMR spectrum of glycocluster **4**.

**Fig. S44.** ESI MS analysis of glycocluster **4**.

**Fig. S45.** 1H NMR spectrum of glycocluster **5**.

**Fig. S46.** ESI MS analysis of glycocluster **5**.

| 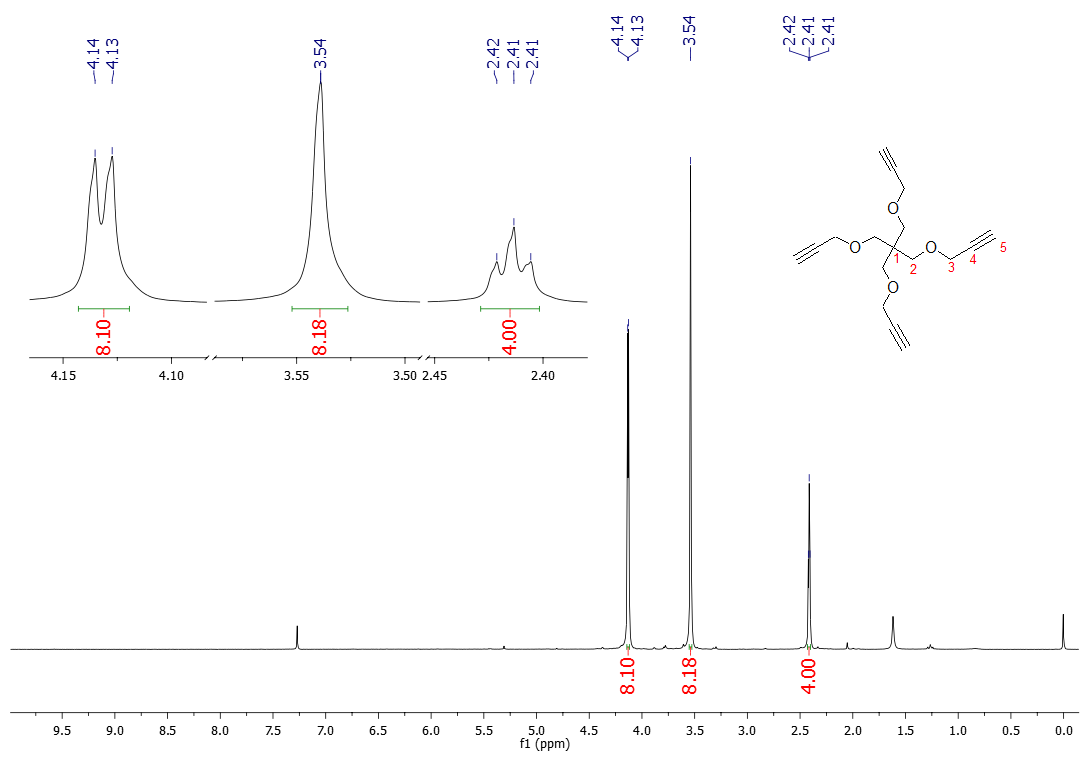 |  |
| --- | --- |

**Fig. S1.** 1H NMR (400 MHz, CDCl3) spectrum of compound **6.**


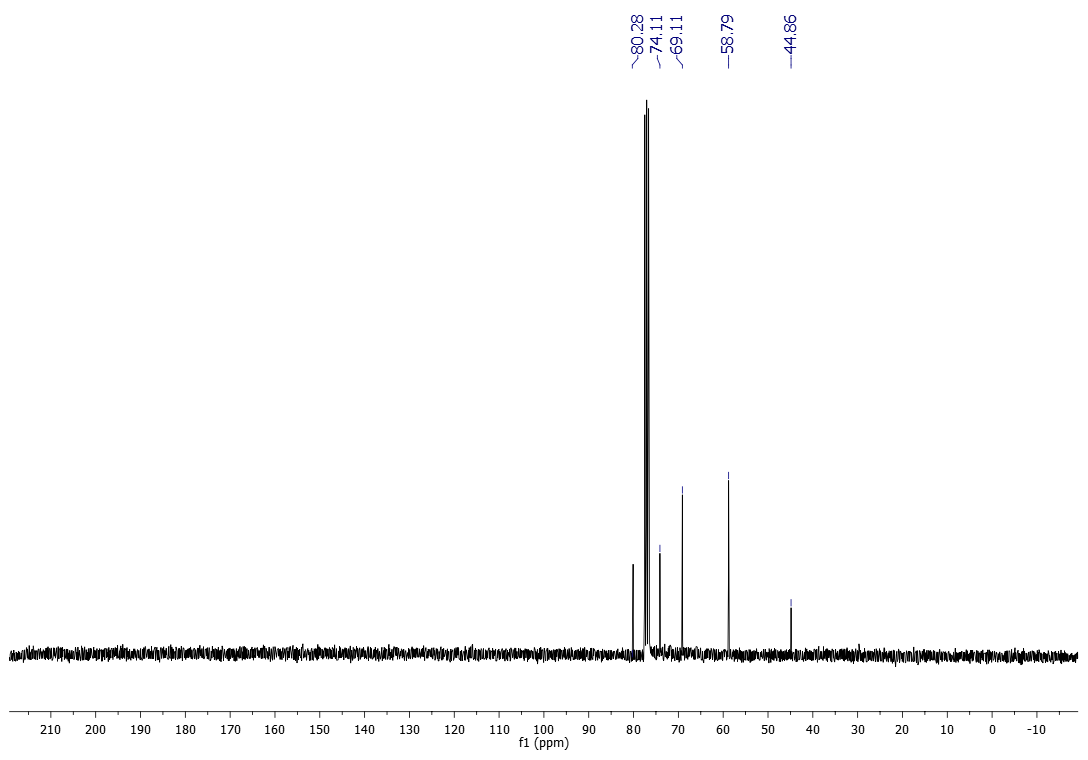


**Fig. S2.** 13C NMR (100 MHz, CDCl3) spectrum of compound **6**.


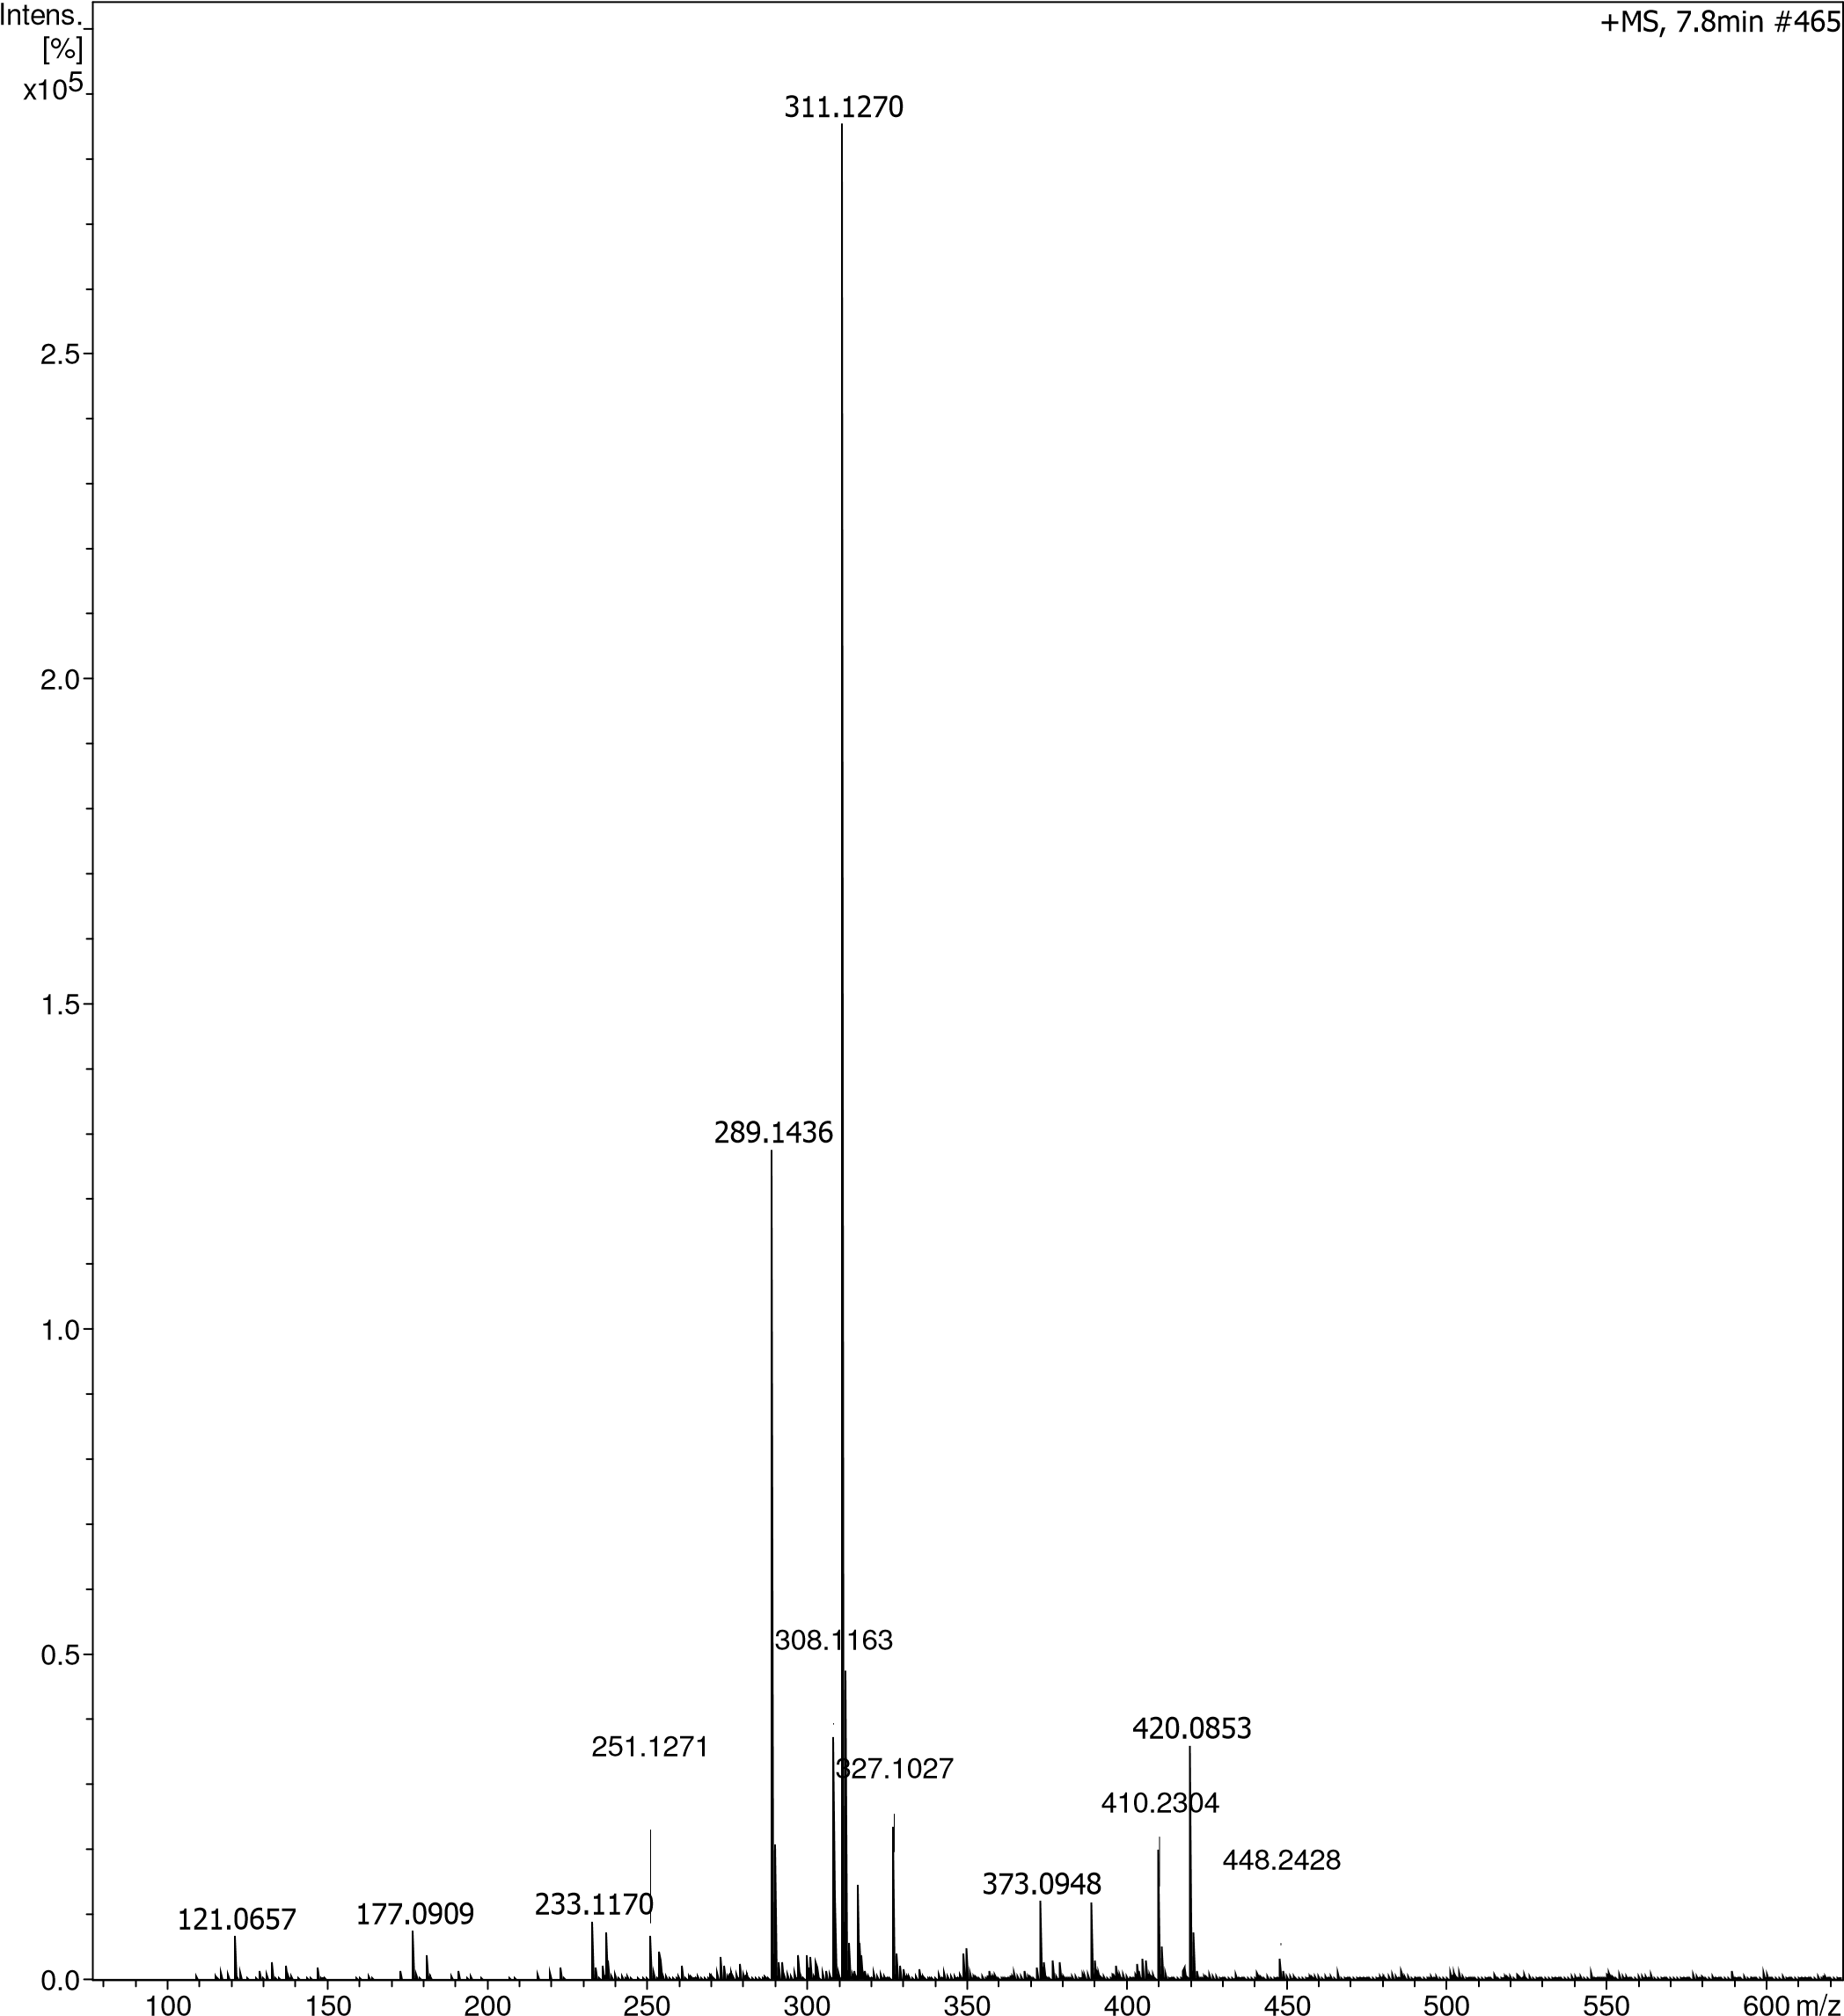


**Fig. S3.** HRMS (ESI) analysis of compound **6**: *m*/*z*[M+H]+ calculated for C17H21O4+289.1434; found: 289.1436.

**
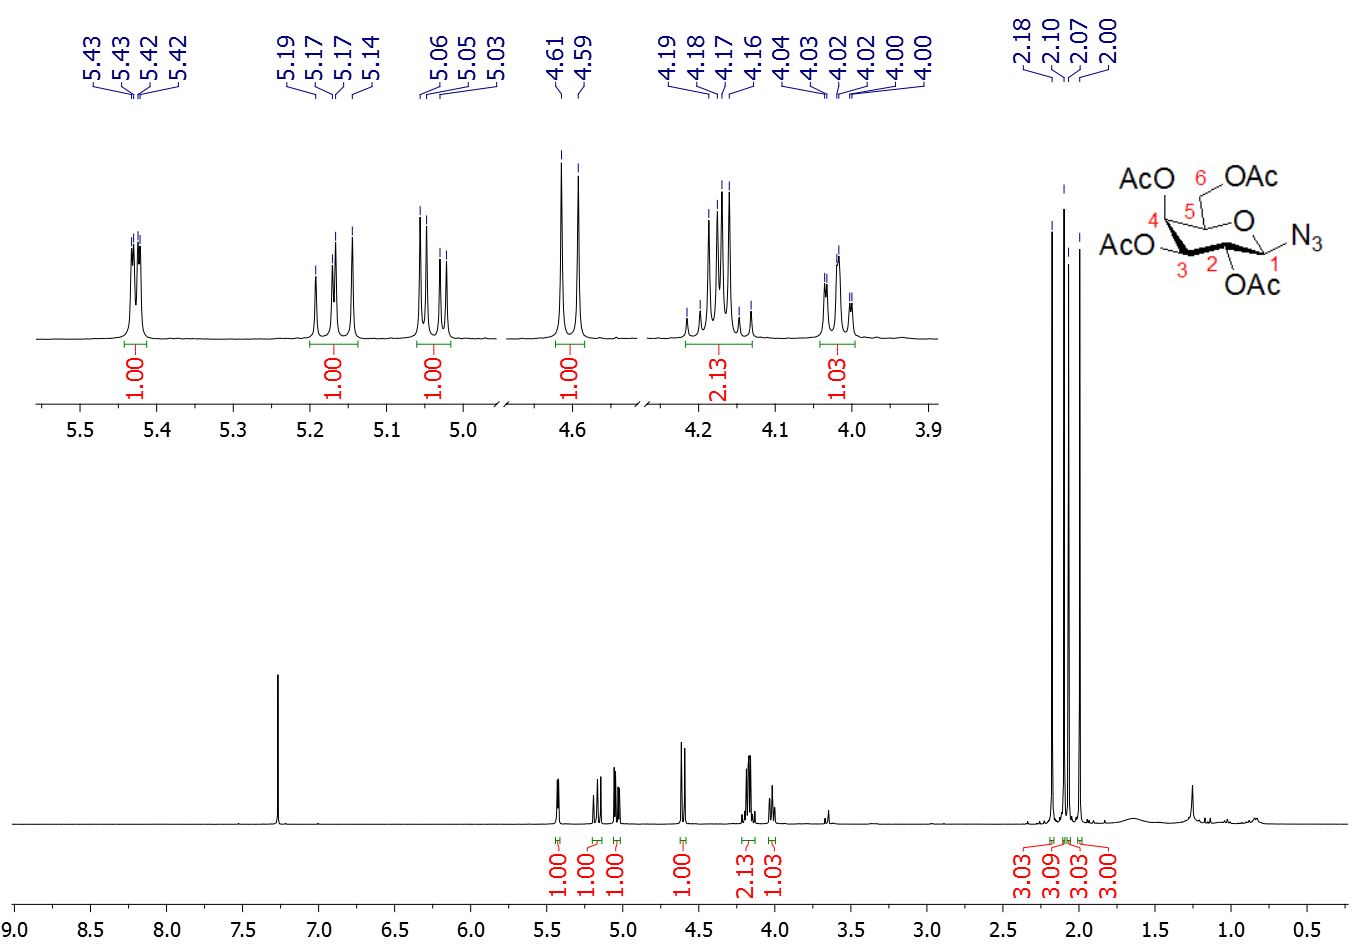
**

**Fig. S4.** 1H NMR (400 MHz, CDCl3) spectrum of compound **7**.


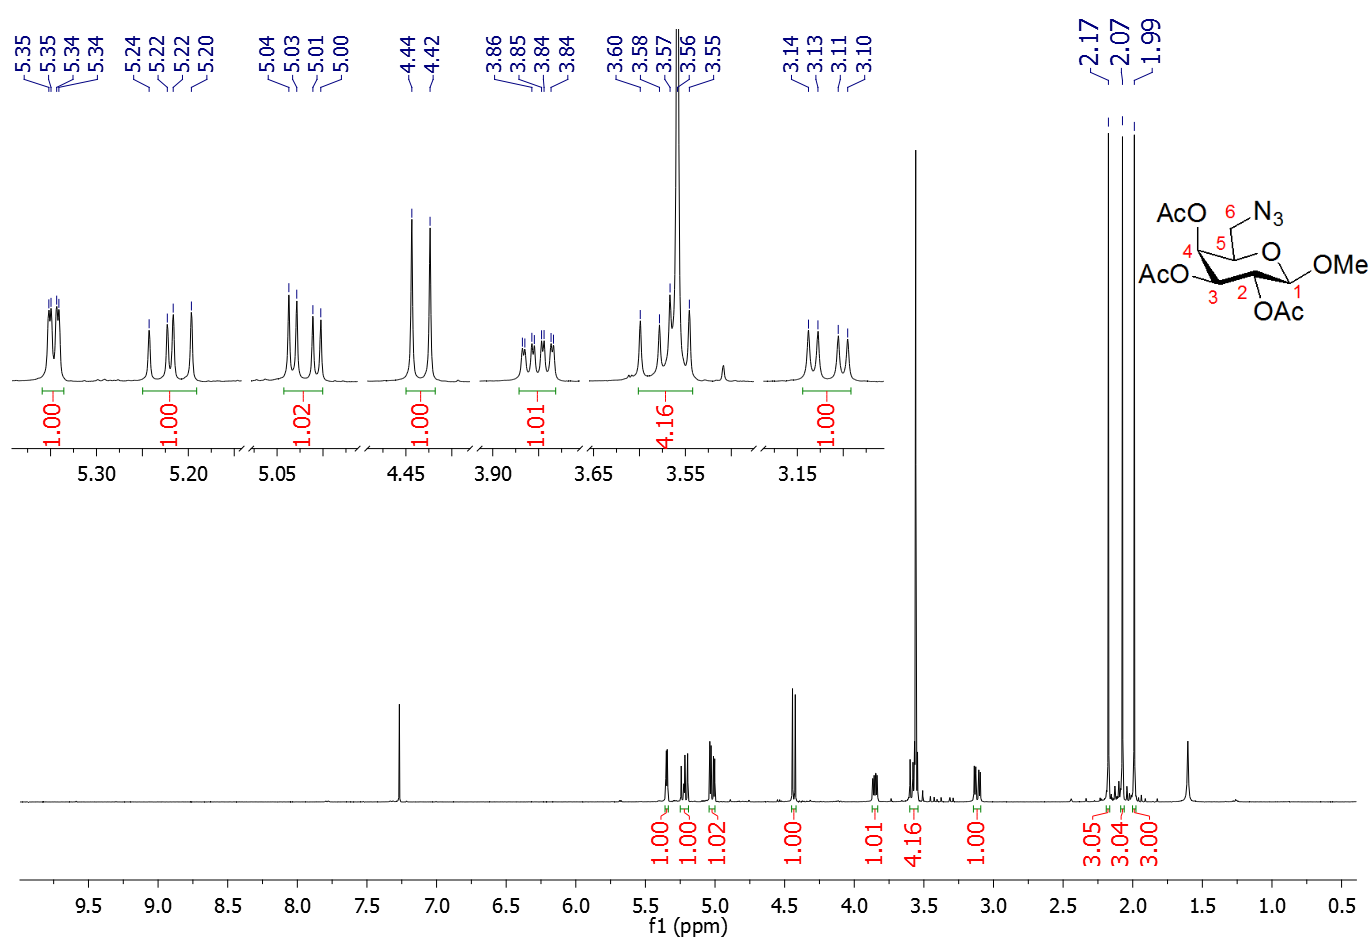


**Fig. S5.** 1H NMR (500 MHz, CDCl3) spectrum of compound **8**.


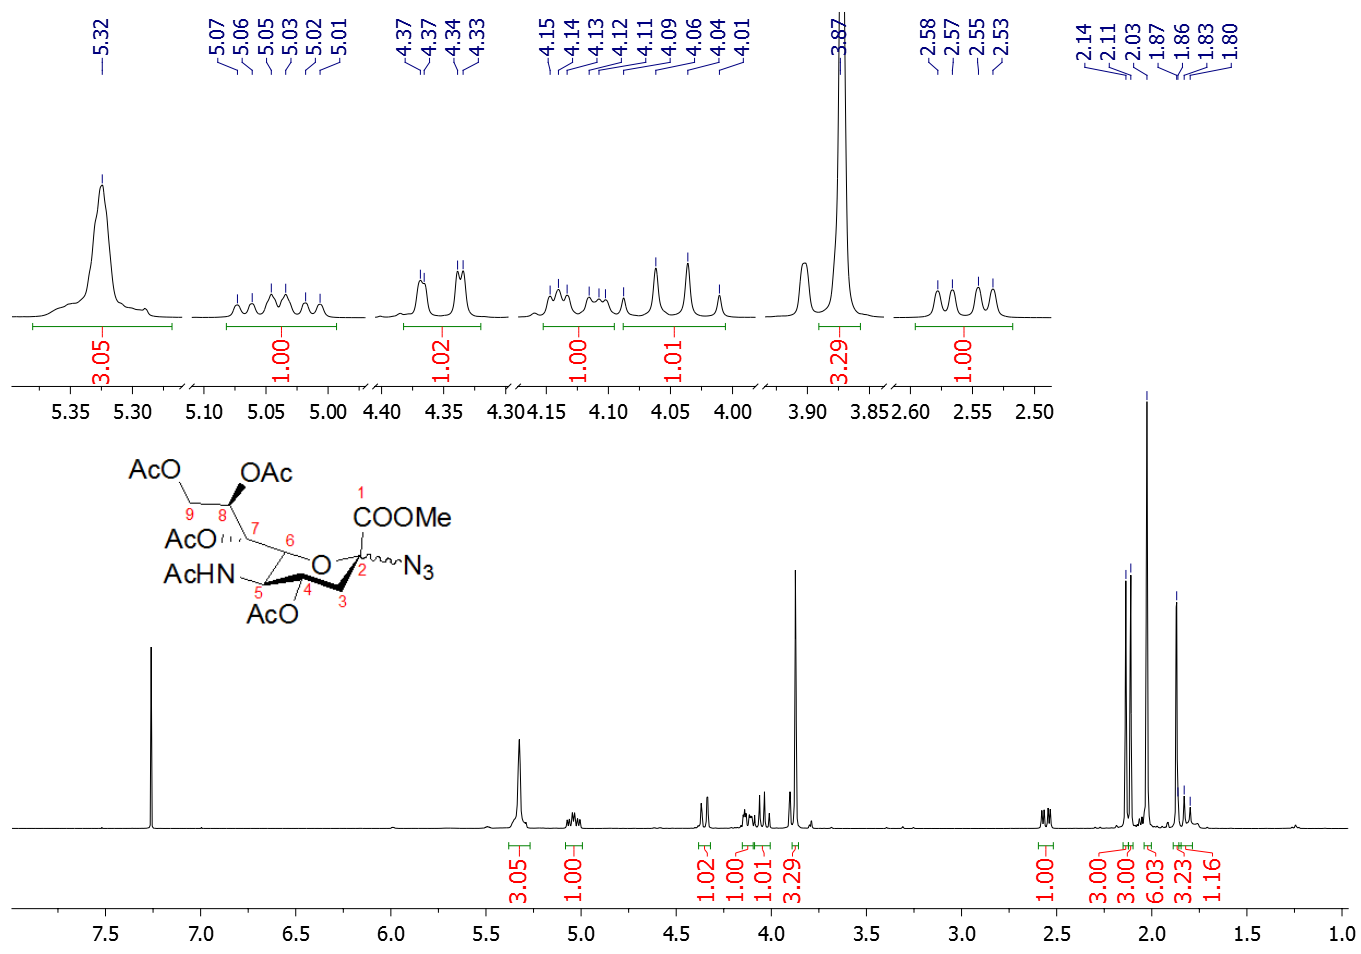


**Fig. S6.** 1H NMR (400 MHz, CDCl3) spectrum of compound **9**.


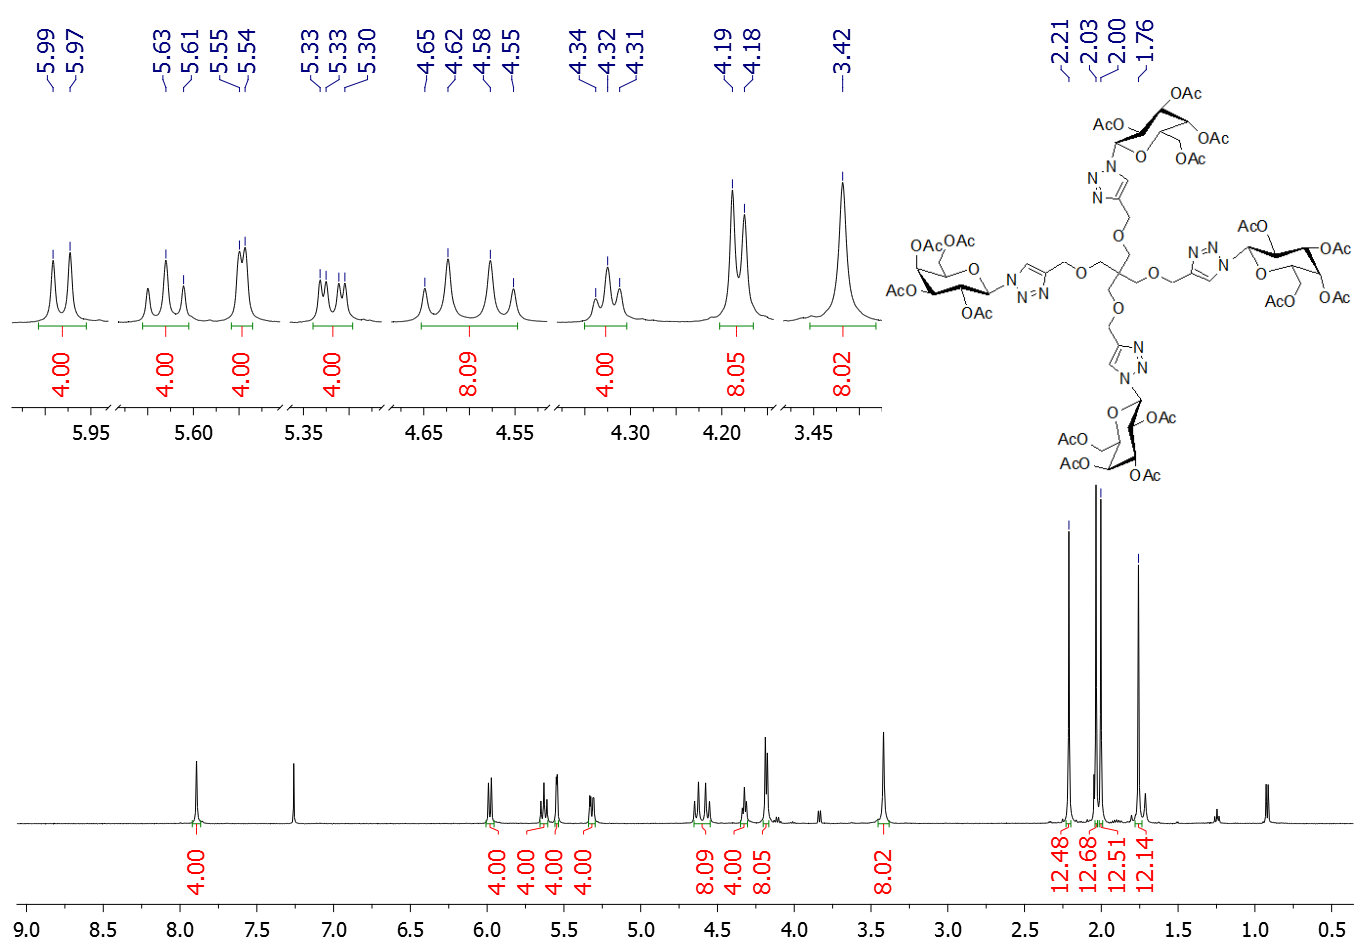


**Fig. S7.** 1H NMR (500 MHz, CDCl3) spectrum of glycocluster **10.**


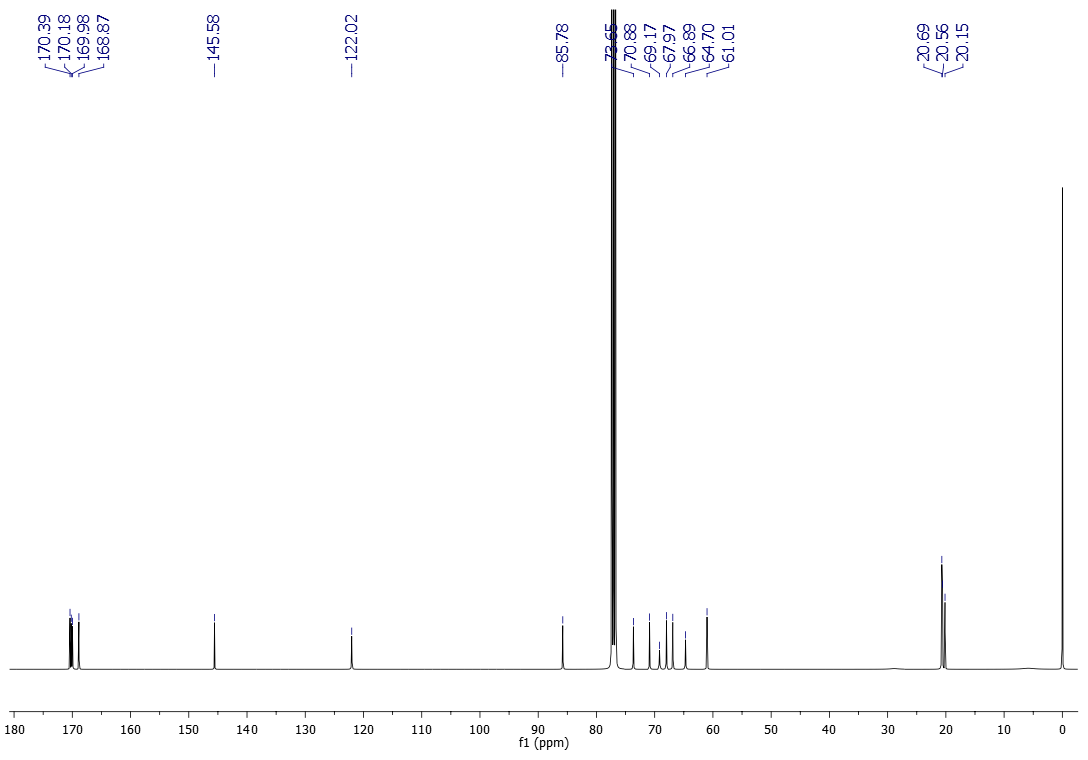


**Fig. S8.** 13C NMR (125 MHz, CDCl3) spectrum of glycocluster **10**.

913.2809913.2809

1392.44171392.4417

1803.57361803.5736

1781.58461781.5846

1819.54431819.5443

1335.47101335.4710

216216

MS, 3.6min #MS, 3.6min #

++

00

22

44

66

44

x10x10

Intens.Intens.

]]

[[

%%

600600

800800

10001000

12001200

14001400

16001600

18001800

20002000

22002200

24002400

m/zm/z

**Fig. S9.** HRMS (ESI) analysis of glycocluster **10**: *m*/*z*[M+Na]+ calculated for C73H96N12NaO40+ 1803.5739; found: 1803.5736.

**
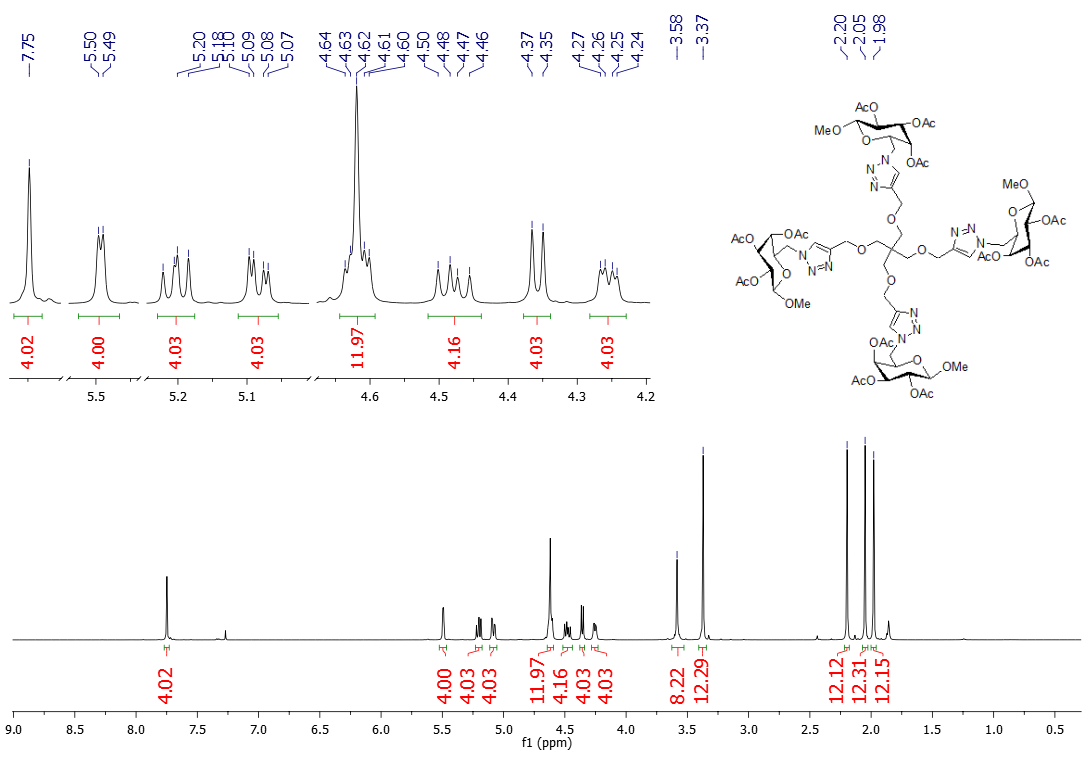
**

**Fig. S10.** 1H NMR (500 MHz, CDCl3) spectrum of glycocluster **11**.


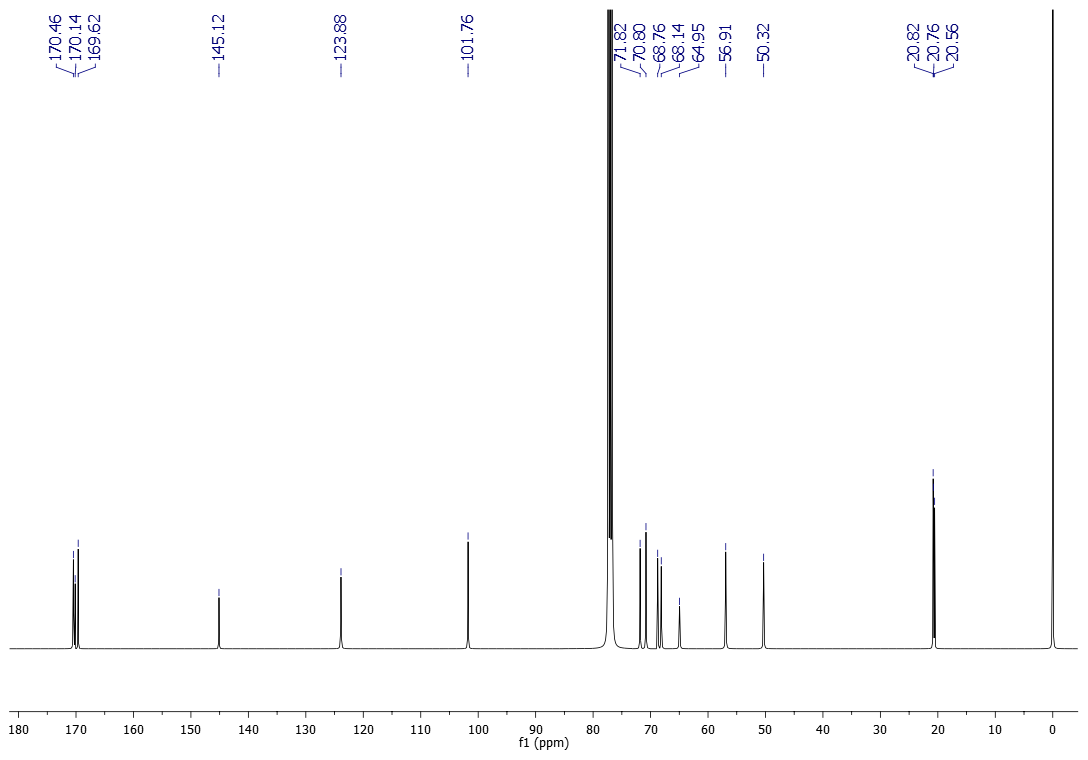


**Fig. S11.** 13C NMR (125 MHz, CDCl3) spectrum of glycocluster **11**.


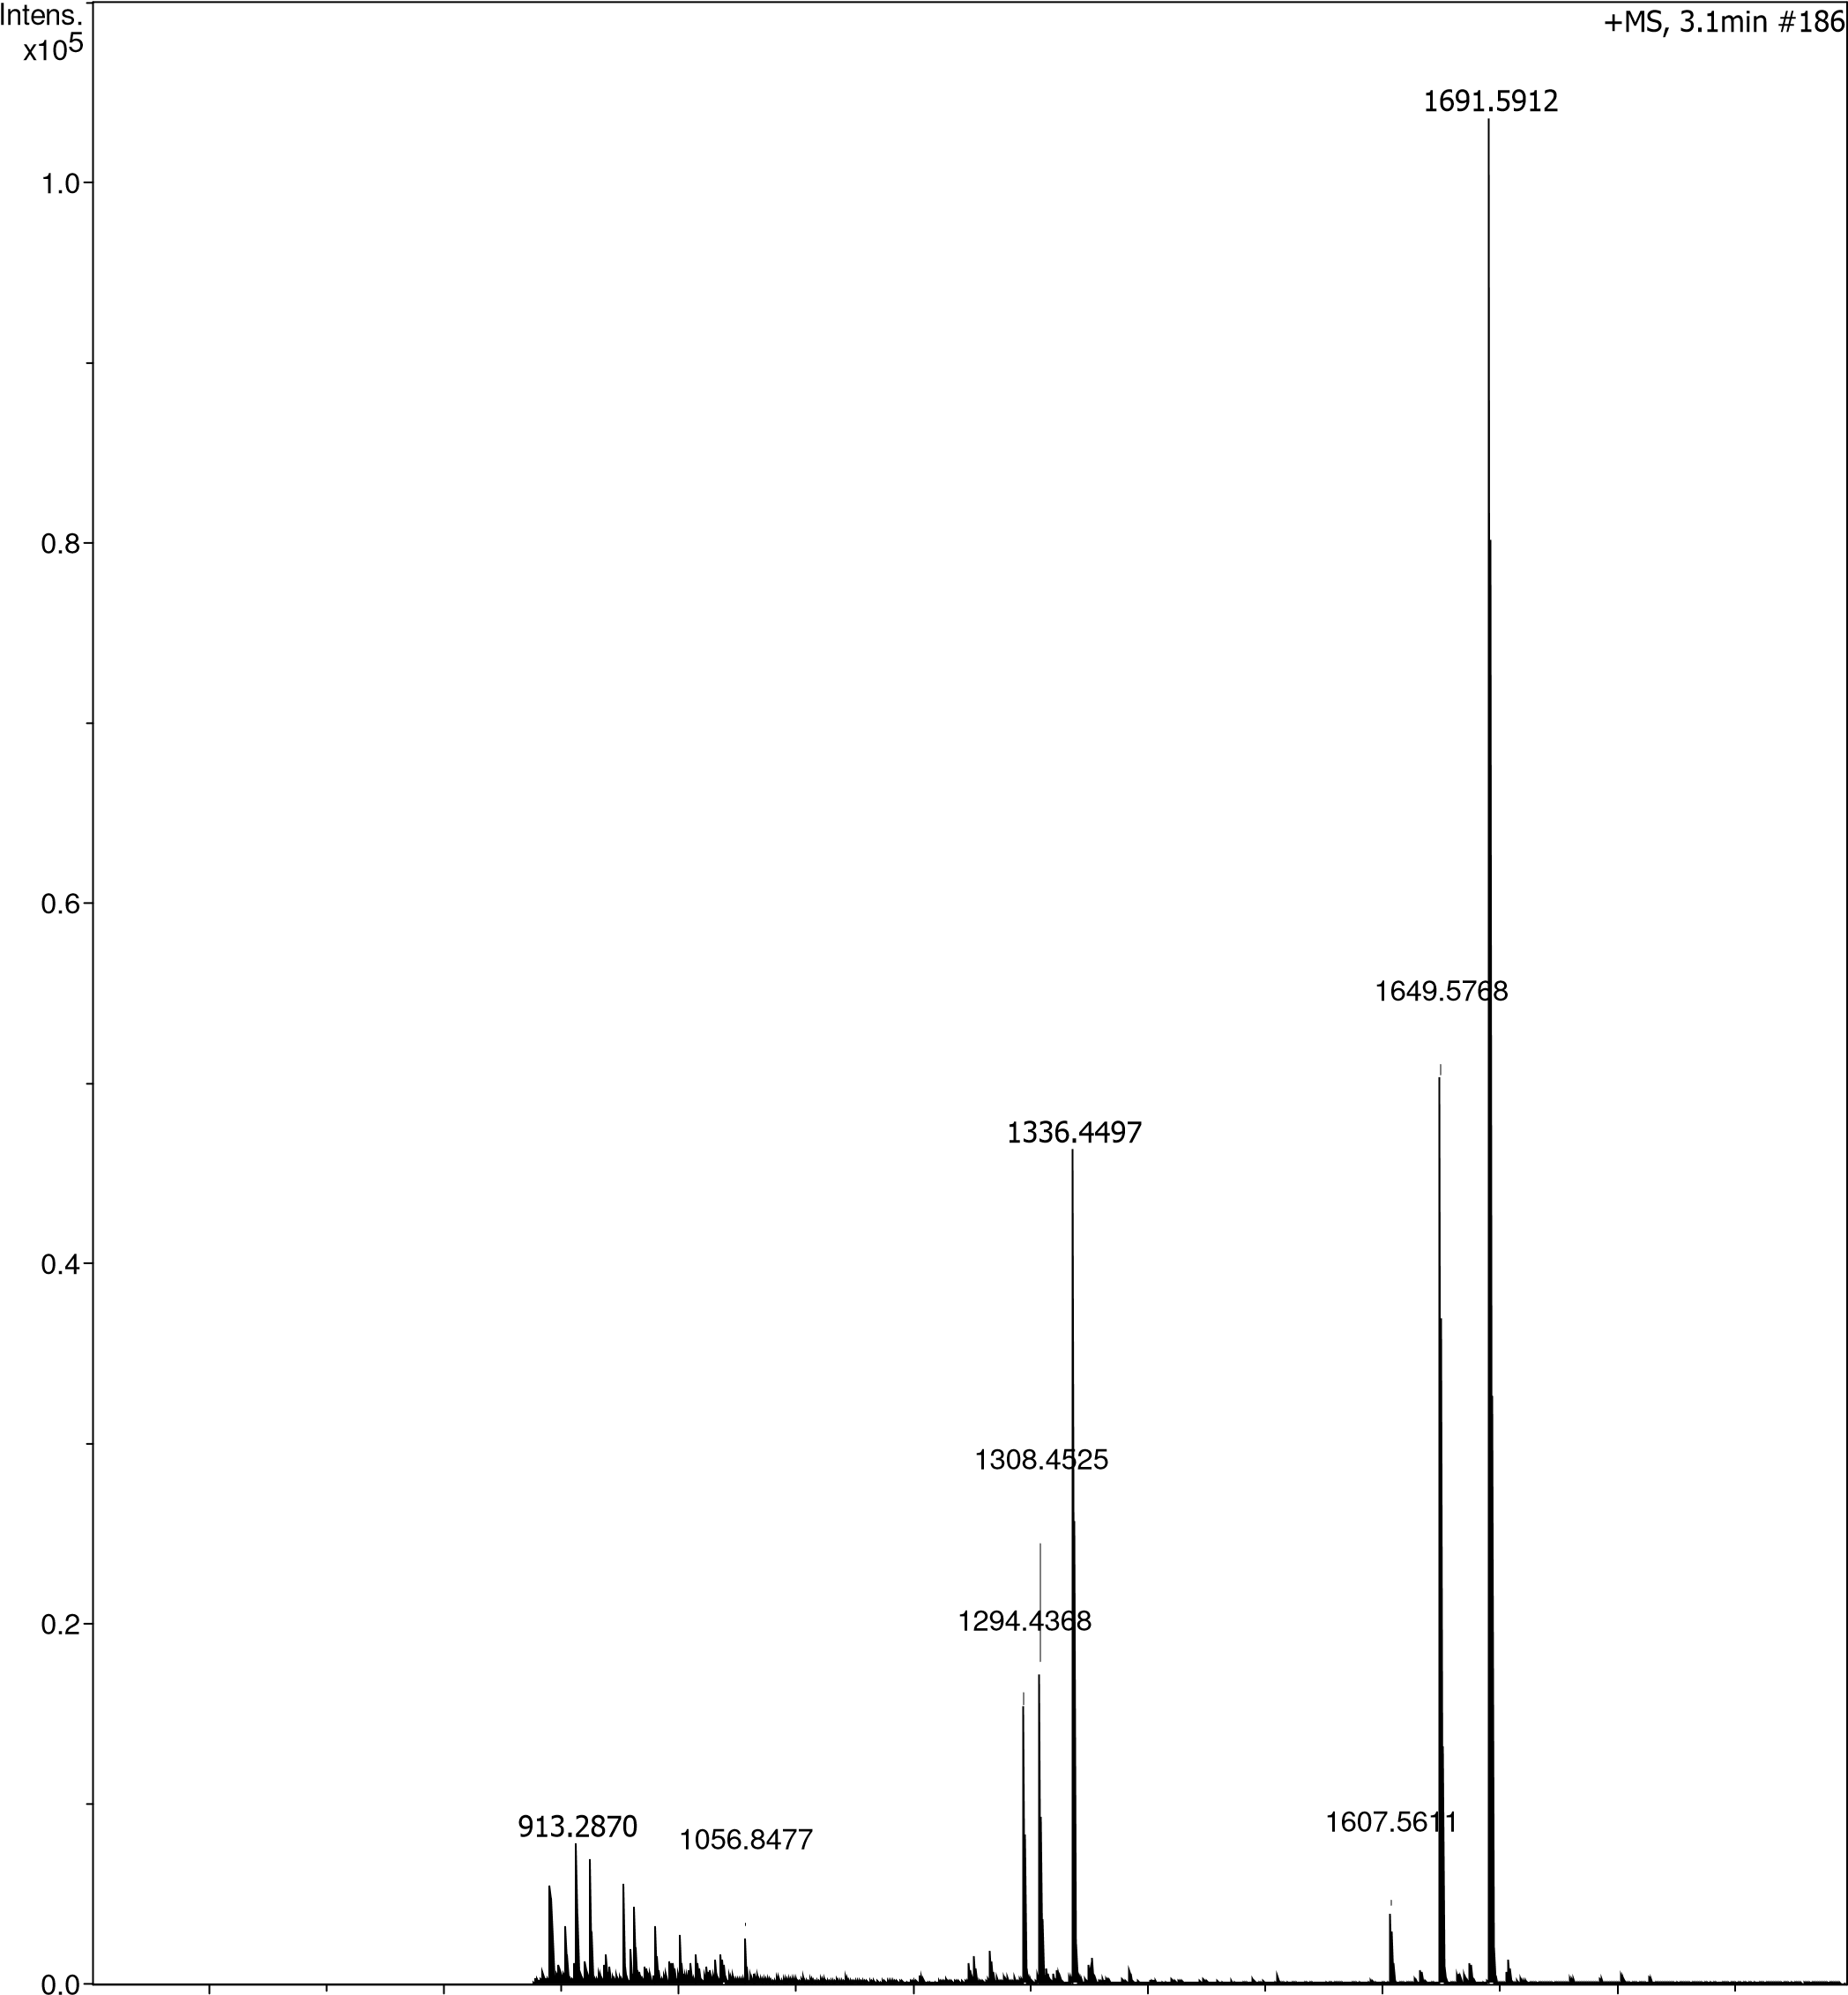


**Fig. S12.** HRMS (ESI) analysis of glycocluster **11**: *m*/*z*[M+Na]+ calculated for C69H96N12NaO36+ 1691.5942; found: 1691.5912.


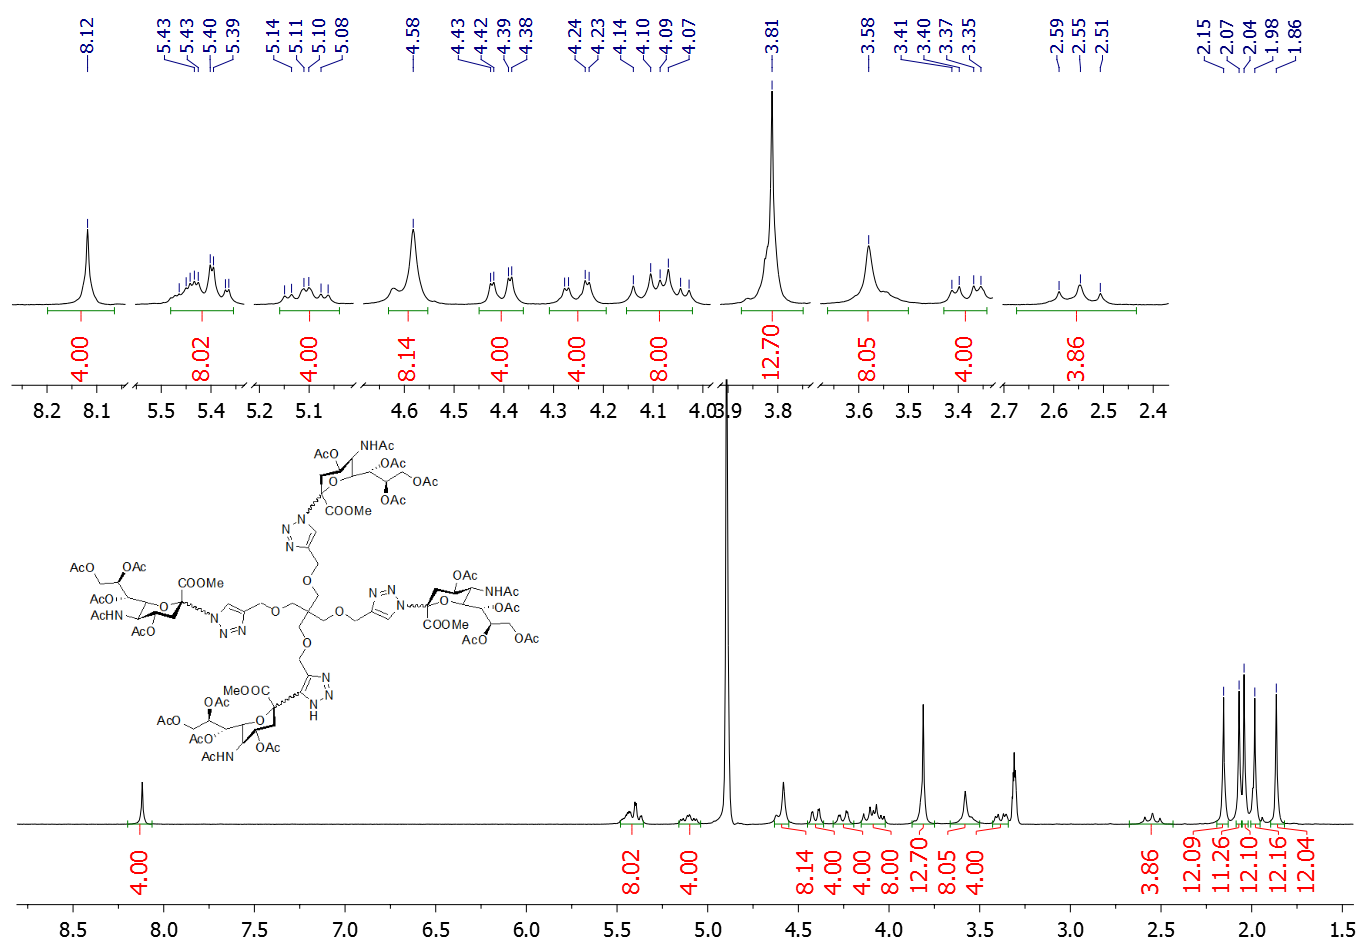


**Fig. S13.** 1H NMR (300 MHz, CD3OD) spectrum of glycocluster **12**.


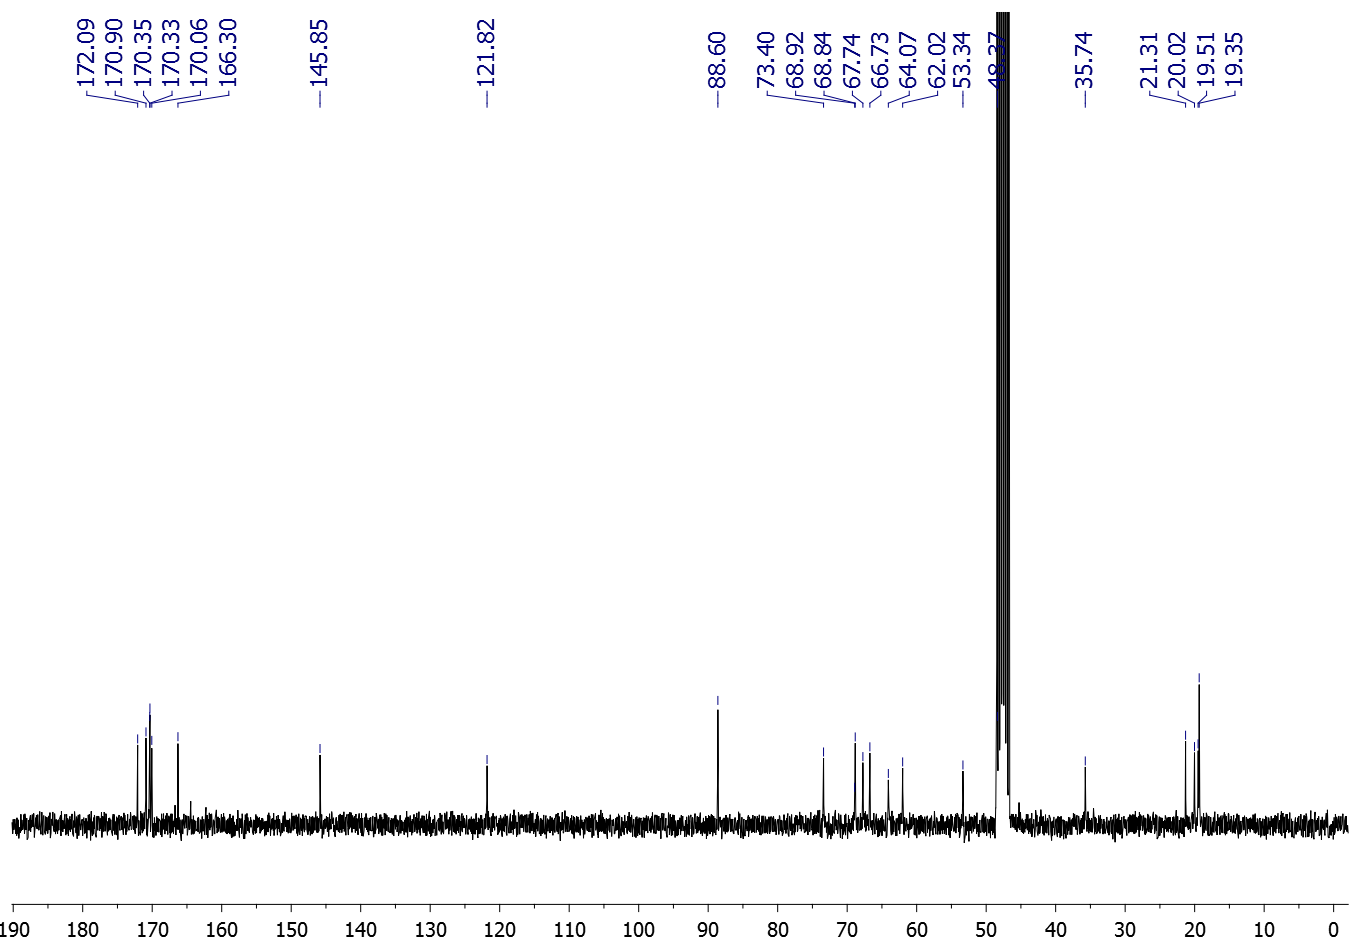


**Fig. S14.** 13C NMR (75 MHz, CD3OD) spectrum of glycocluster **12**.

1799.3187

2375.8075

2803.4436

0.0

0.2

0.4

0.6

0.8

1.0

1.2

6

x10

Intens.

1000

2000

3000

4000

5000

m/z

1

1

**Fig. S15.** ESI MS analysis of glycocluster **12**: *m*/*z*[M+Na]+ calculated for C97H132N16NaO52+ 2375.8069; found: 2375.8075.


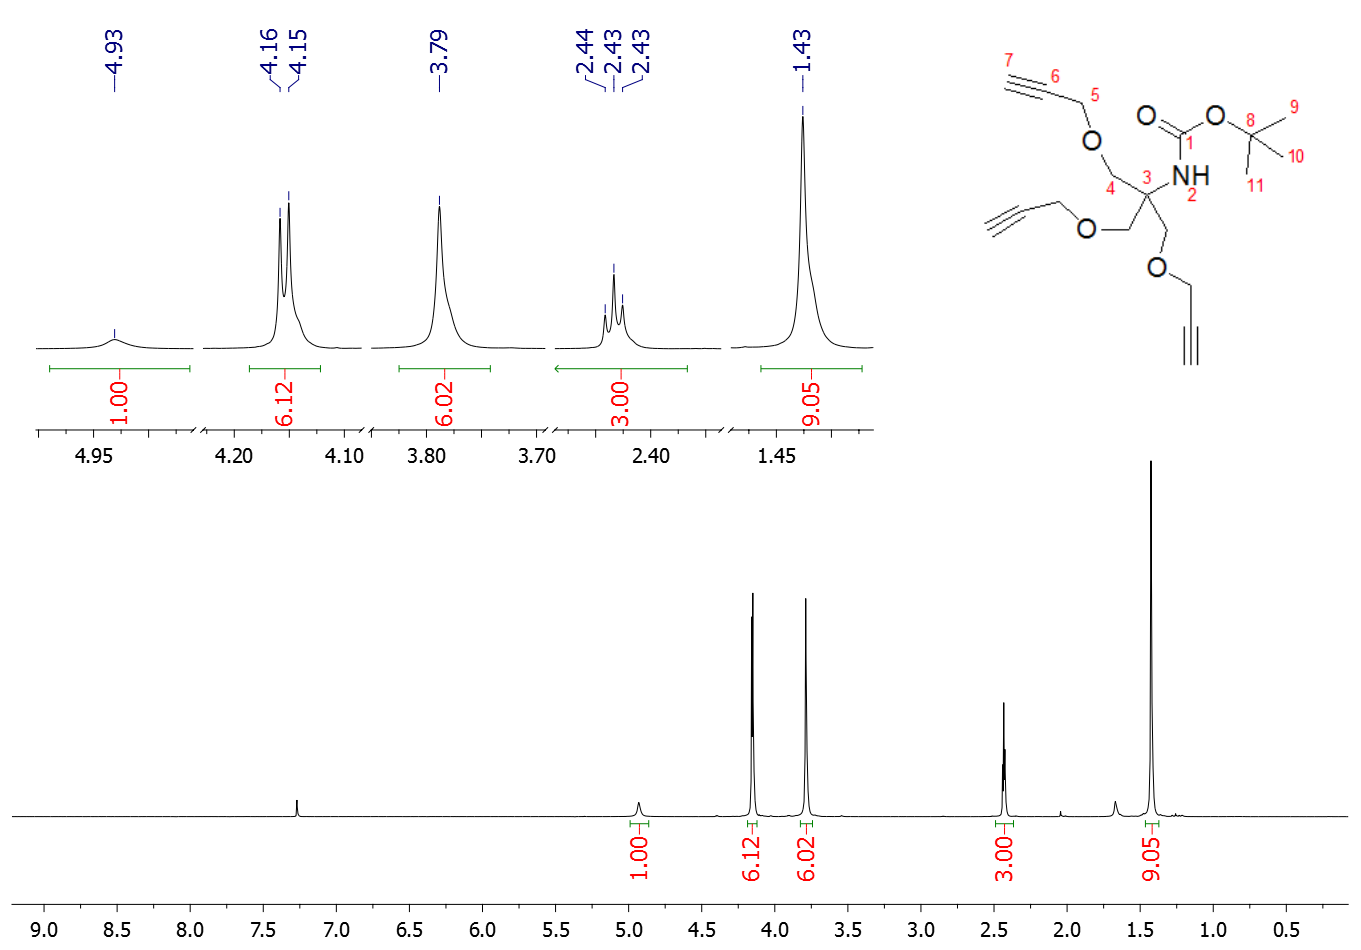


**Fig. S16.** 1H NMR (300 MHz, CDCl3) spectrum of compound **13.**


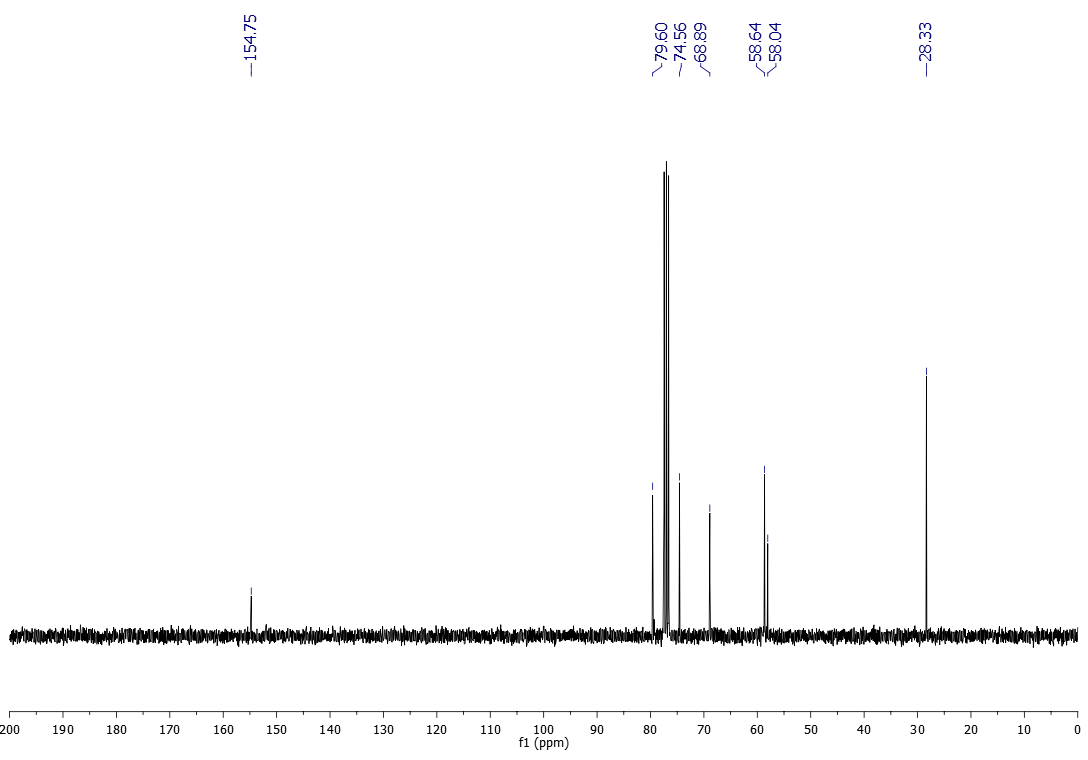


**Fig. S17.** 13C NMR (75 MHz, CDCl3) spectrum of compound **13**.


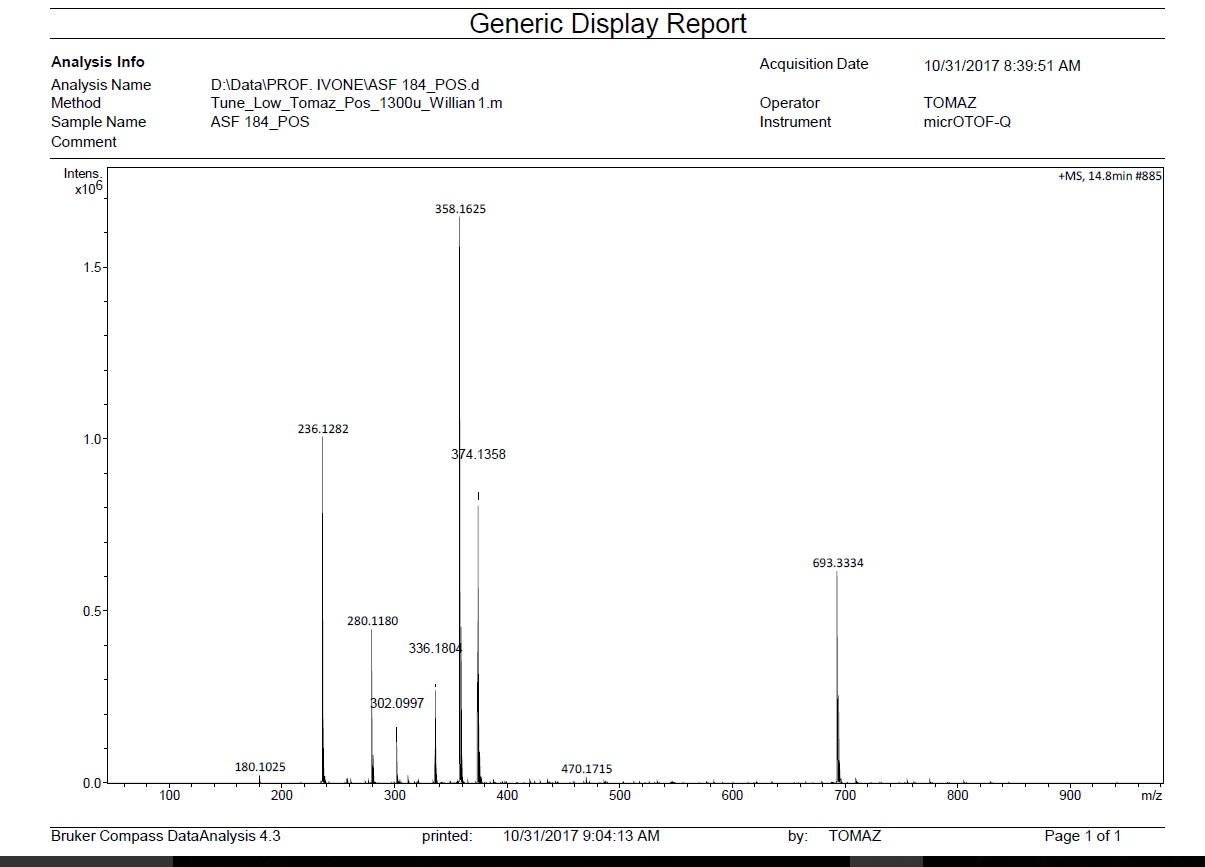


**Fig. S18.** HRMS (ESI) analysis of compound **13**: *m*/*z*[M+Na]+ calculated for C18H25NNaO5+ 358.1625; found: 358.1625.

**
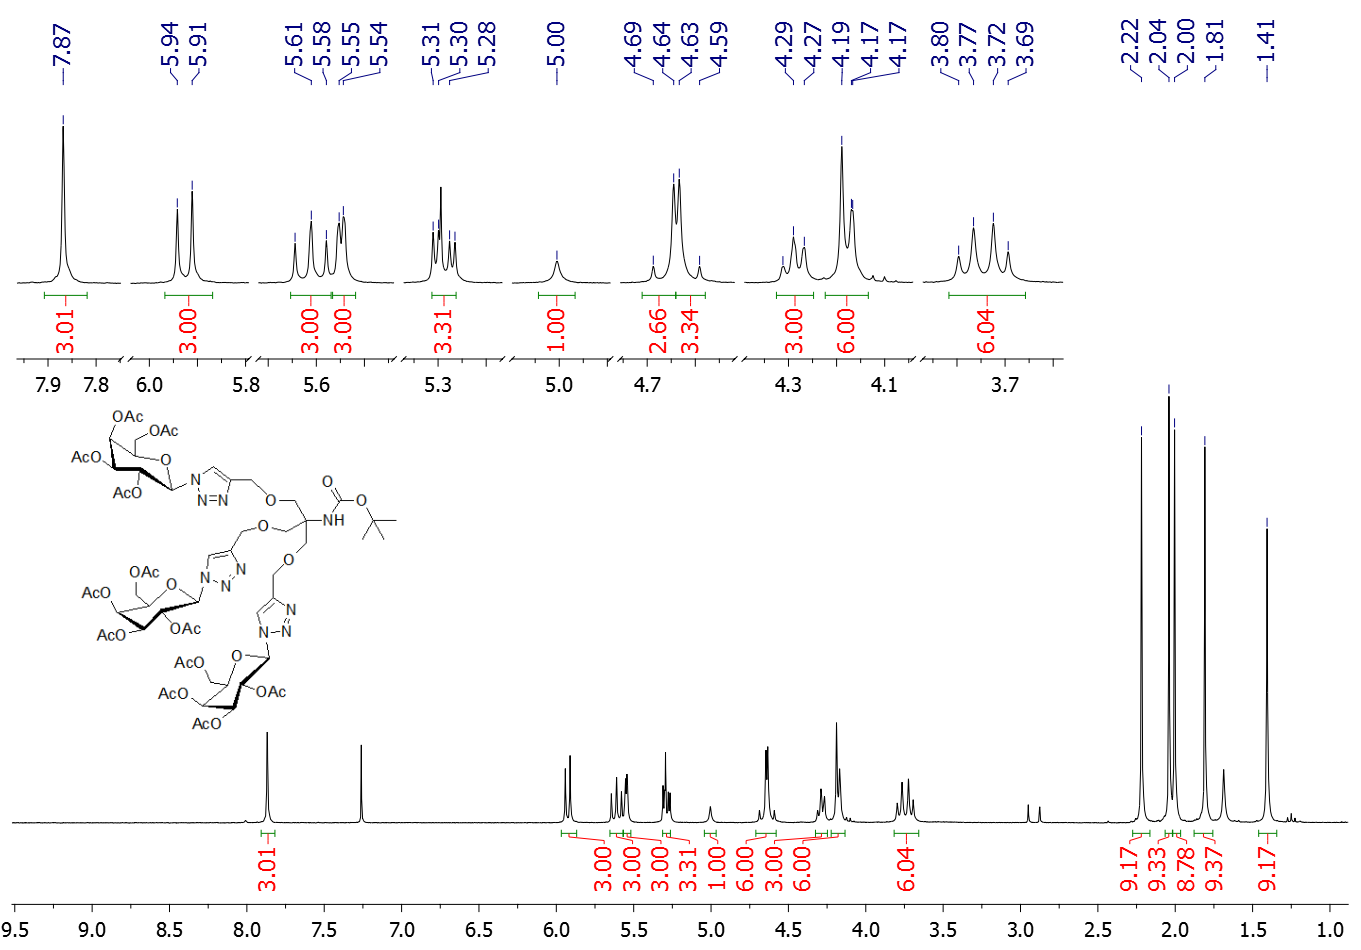
**

**Fig. S19.** 1H NMR (300 MHz, CDCl3) spectrum of compound **14**.


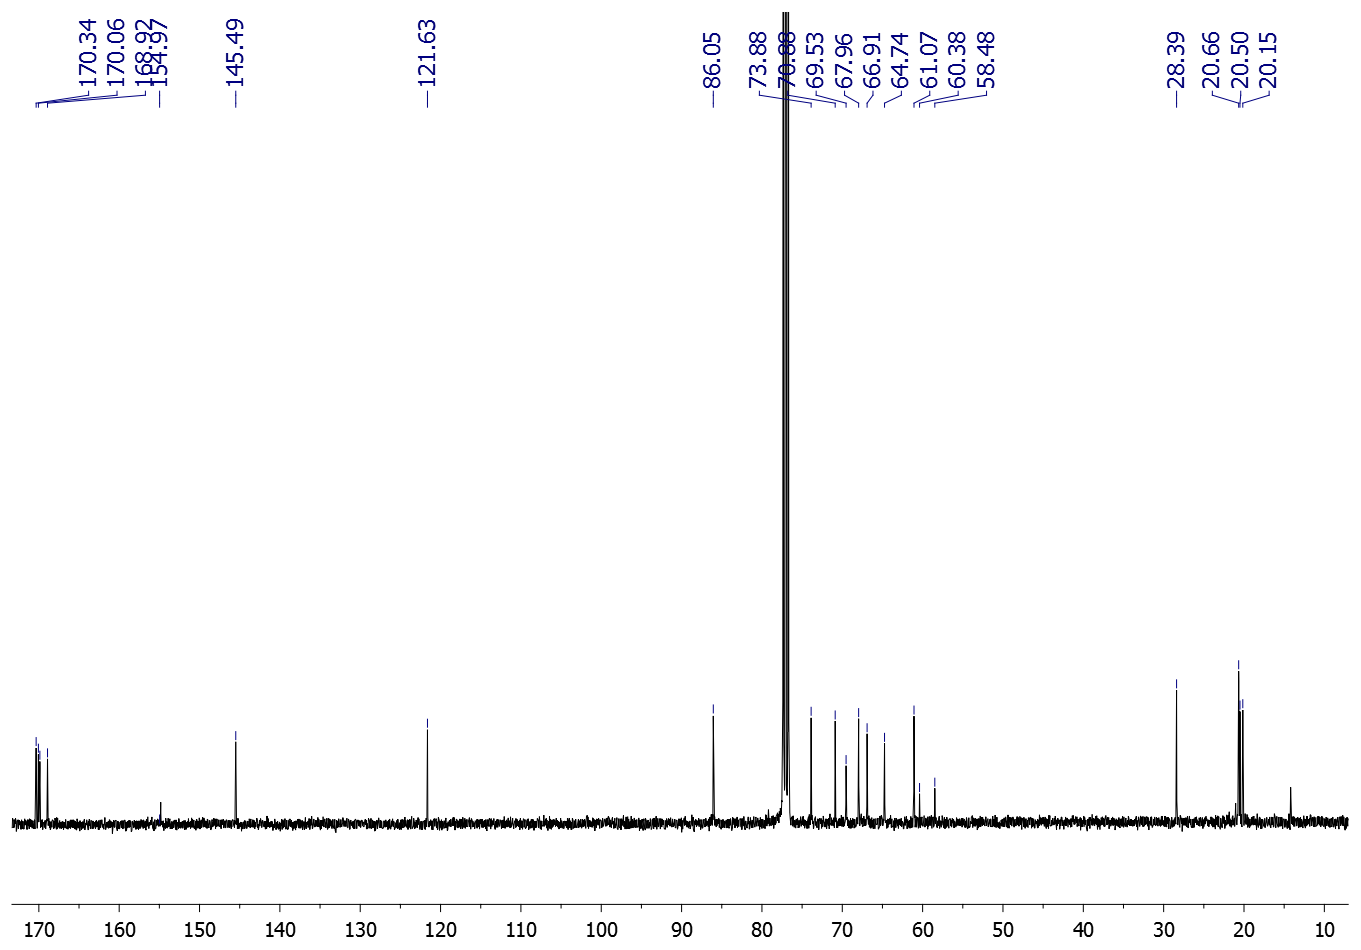


**Fig. S20.** 13C NMR (75 MHz, CDCl3) spectrum of compound **14**.


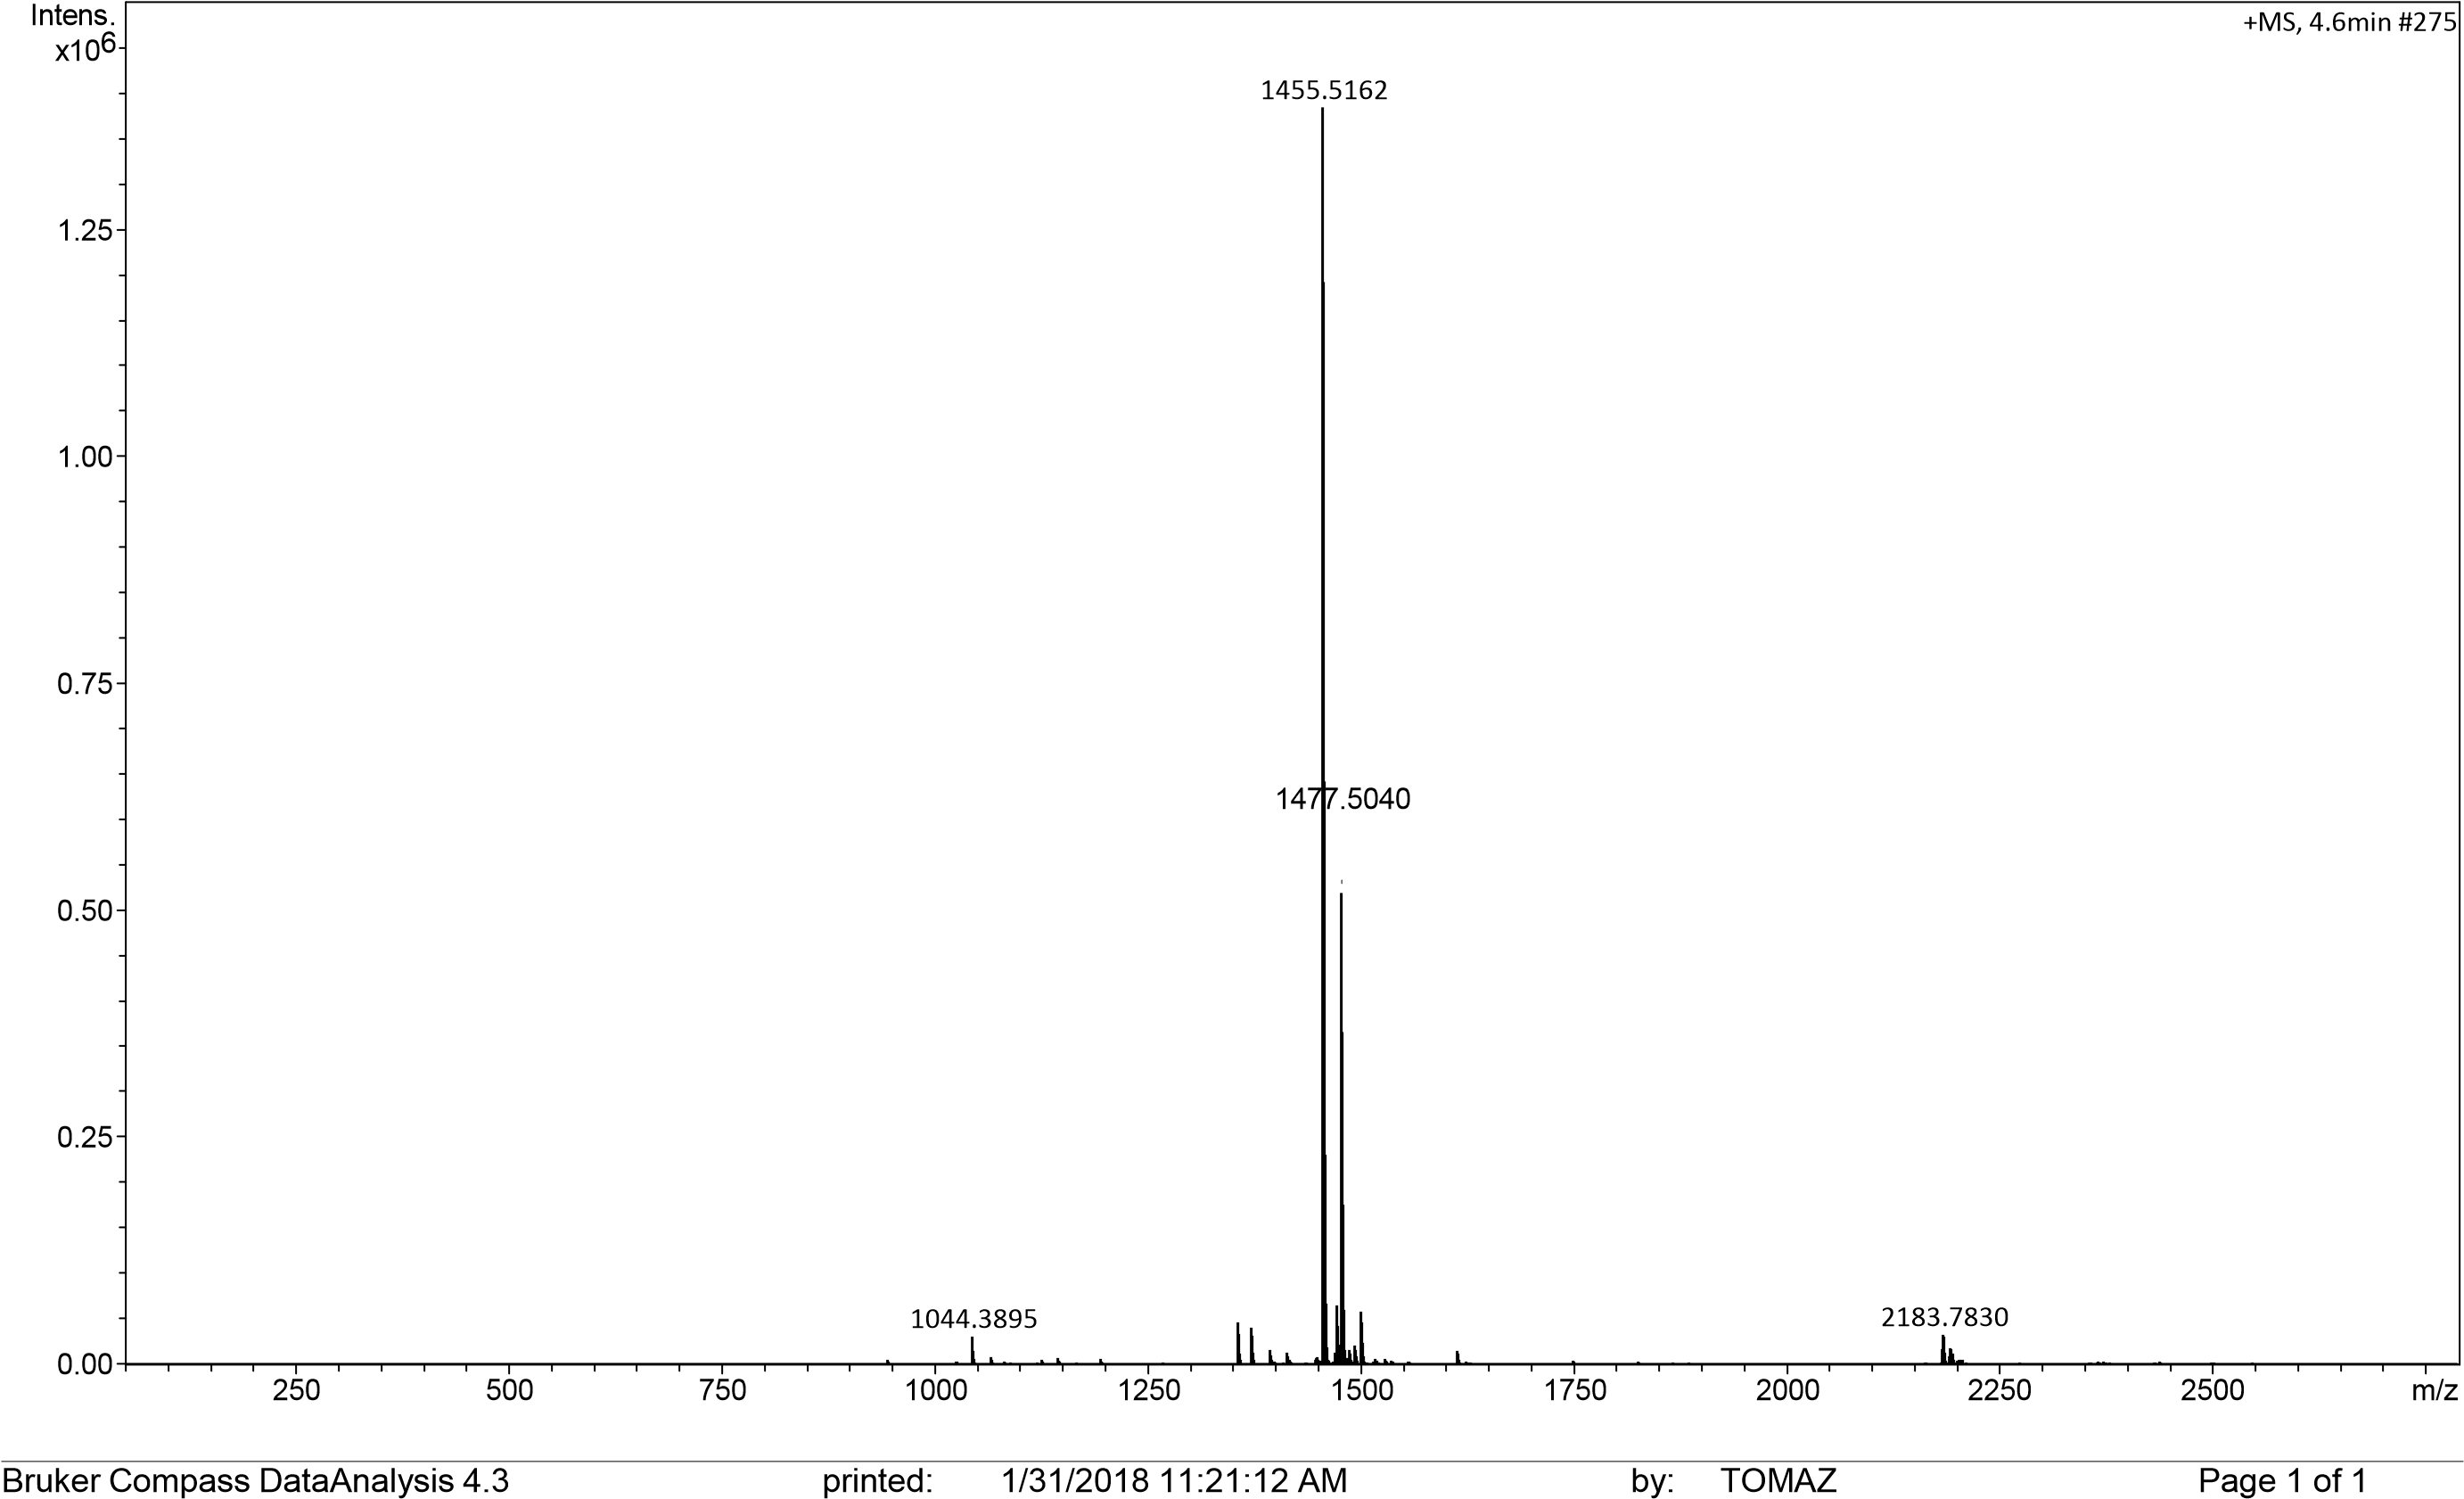


**Fig. S21.** HRMS (ESI) analysis of compound **14**: *m*/*z*[M+H]+ calculated for C60H83N10O32+ 1455.5169; found: 1455.5162; [M+Na]+ calculated for C60H82NaN10O32+ 1477.4989, found: 1477.5040.


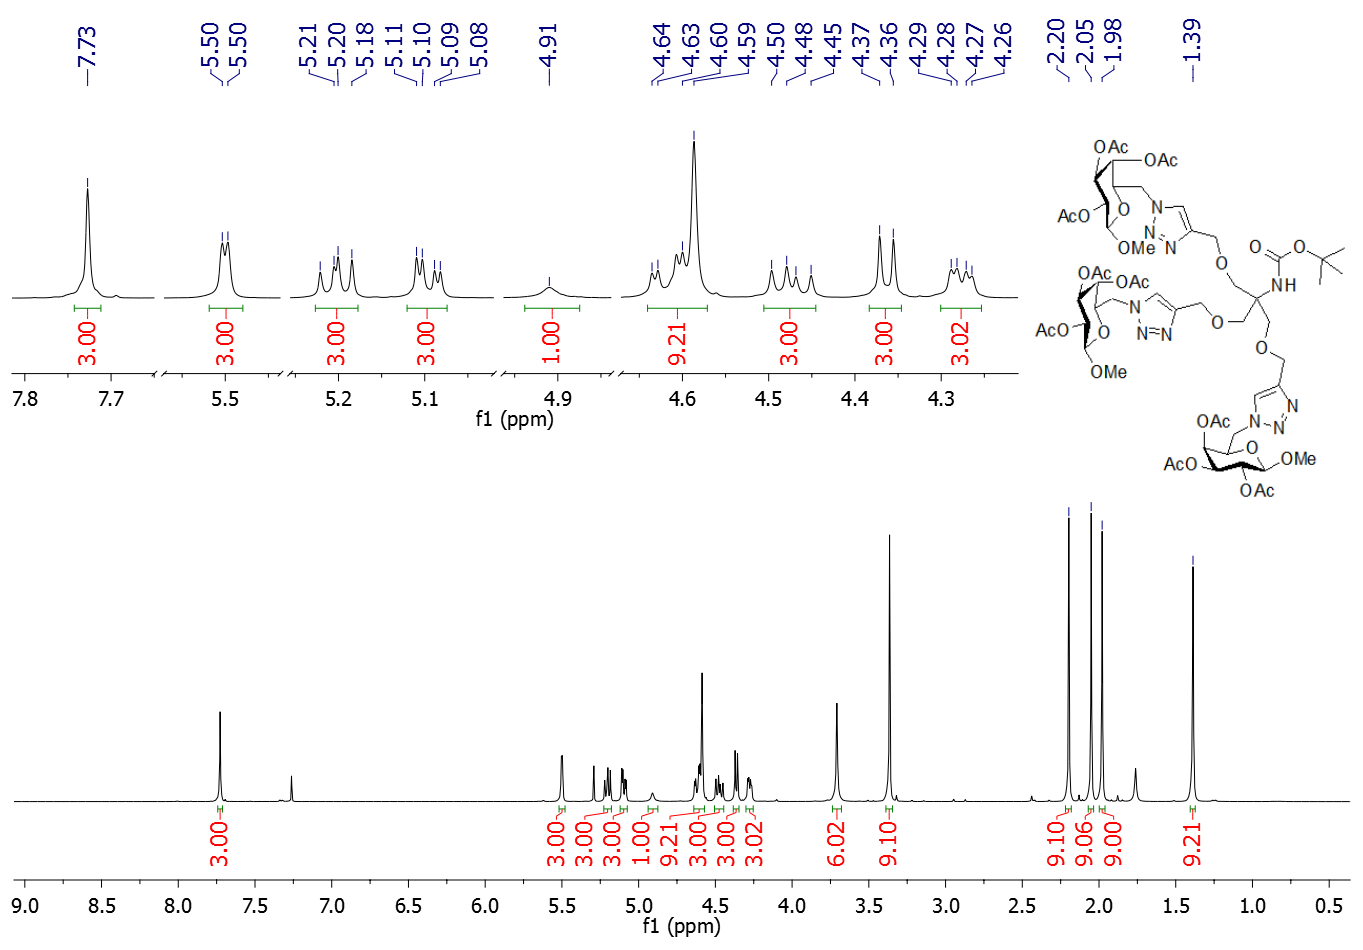


**Fig. S22.** 1H NMR spectrum (500 MHz, CDCl3) of compound **15**.


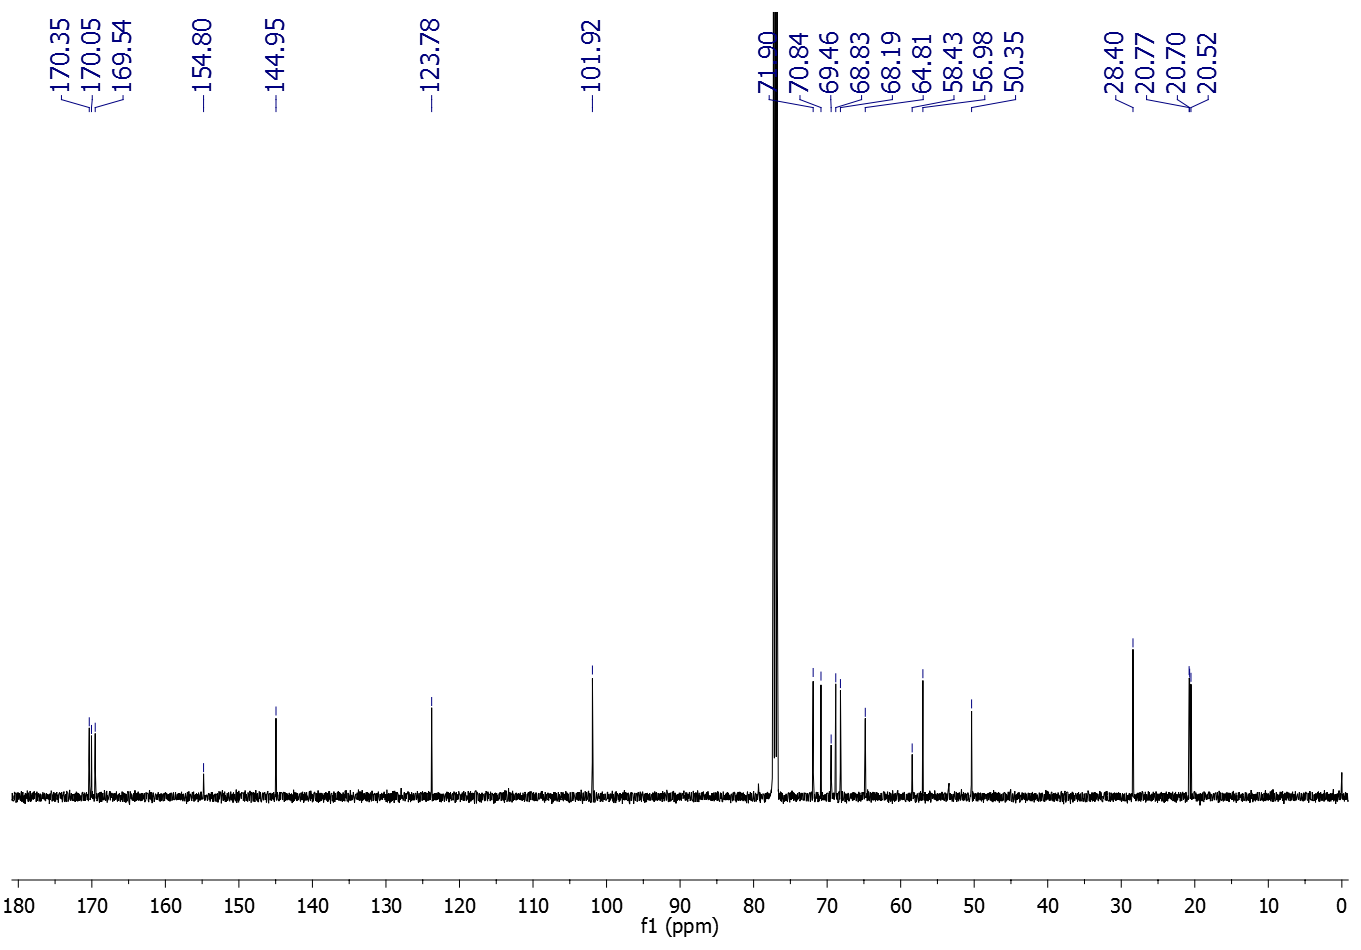


**Fig. S23.** 13C NMR (125 MHz, CDCl3) spectrum of compound **15**.


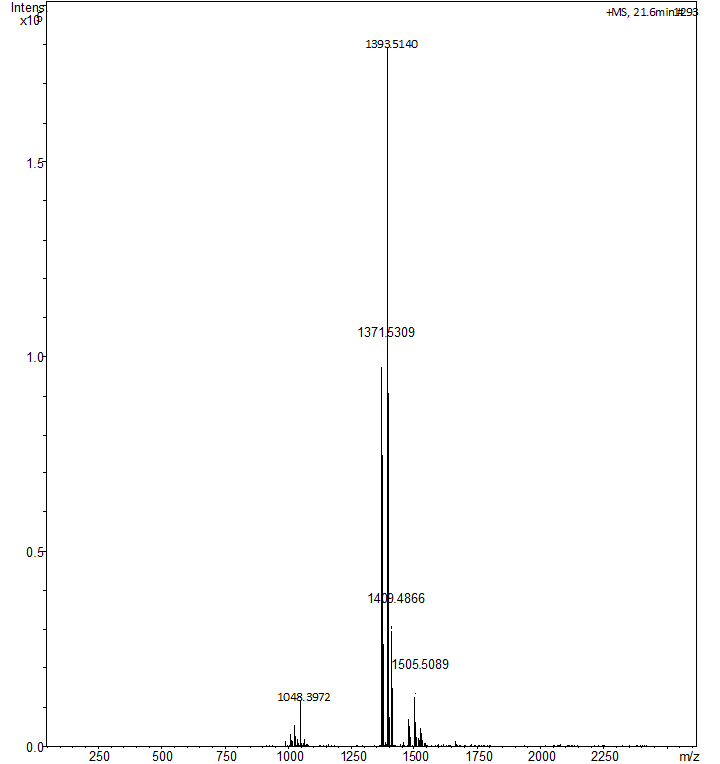


**Fig. S24.** ESI MS analysis of compound **15**: *m*/*z*[M+Na]+ calculated for C57H82N10NaO29+ 1393.5140; found: 1393.5140; [M+K]+ calculated for C57H82N10KO29+ 1409.4881, found: 1409.4866.


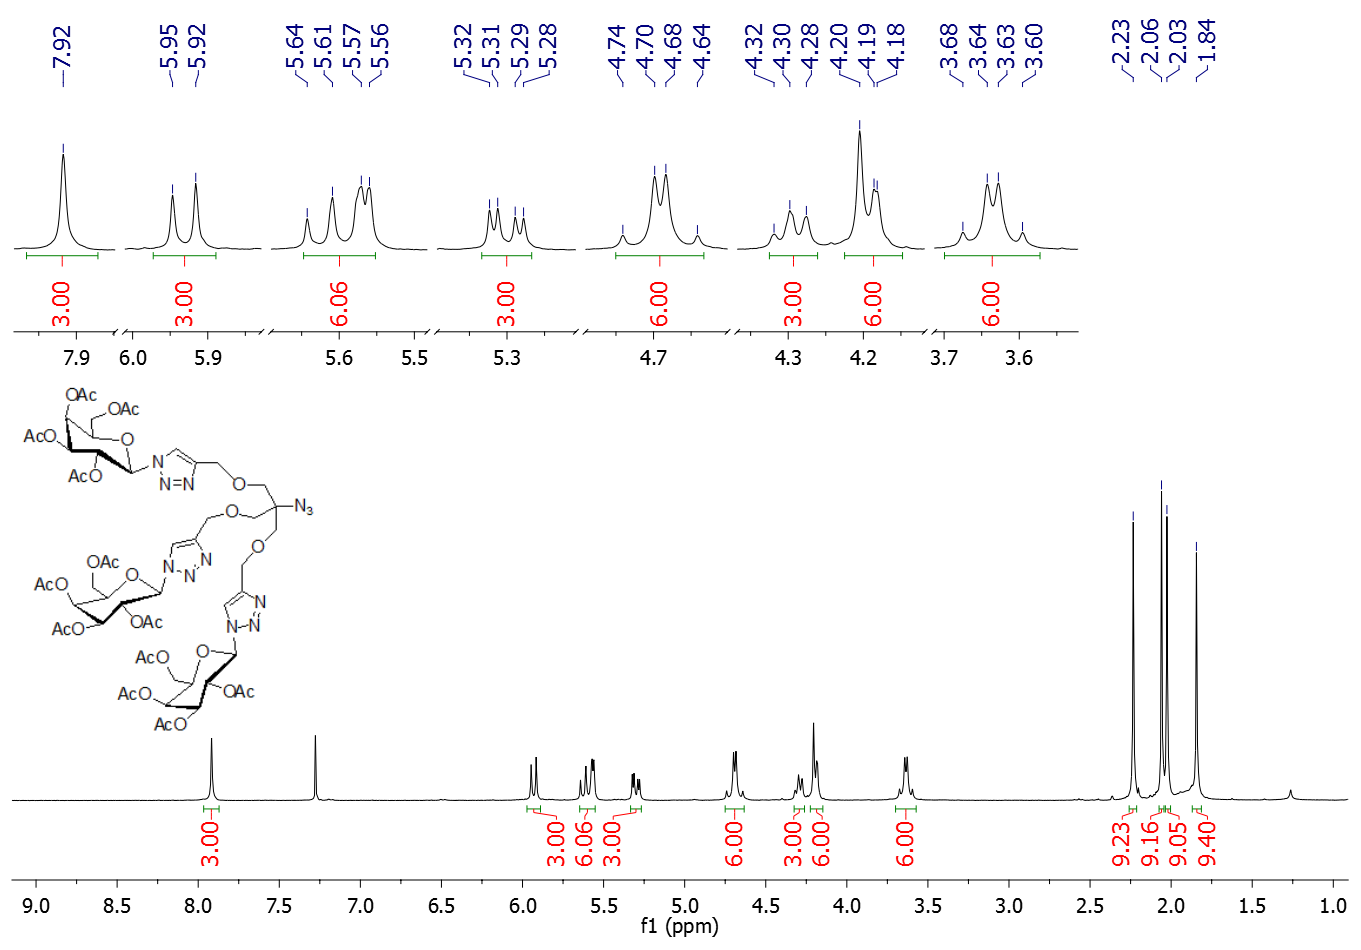


**Fig. S25.** 1H NMR (300 MHz, CDCl3) spectrum of compound **18**.


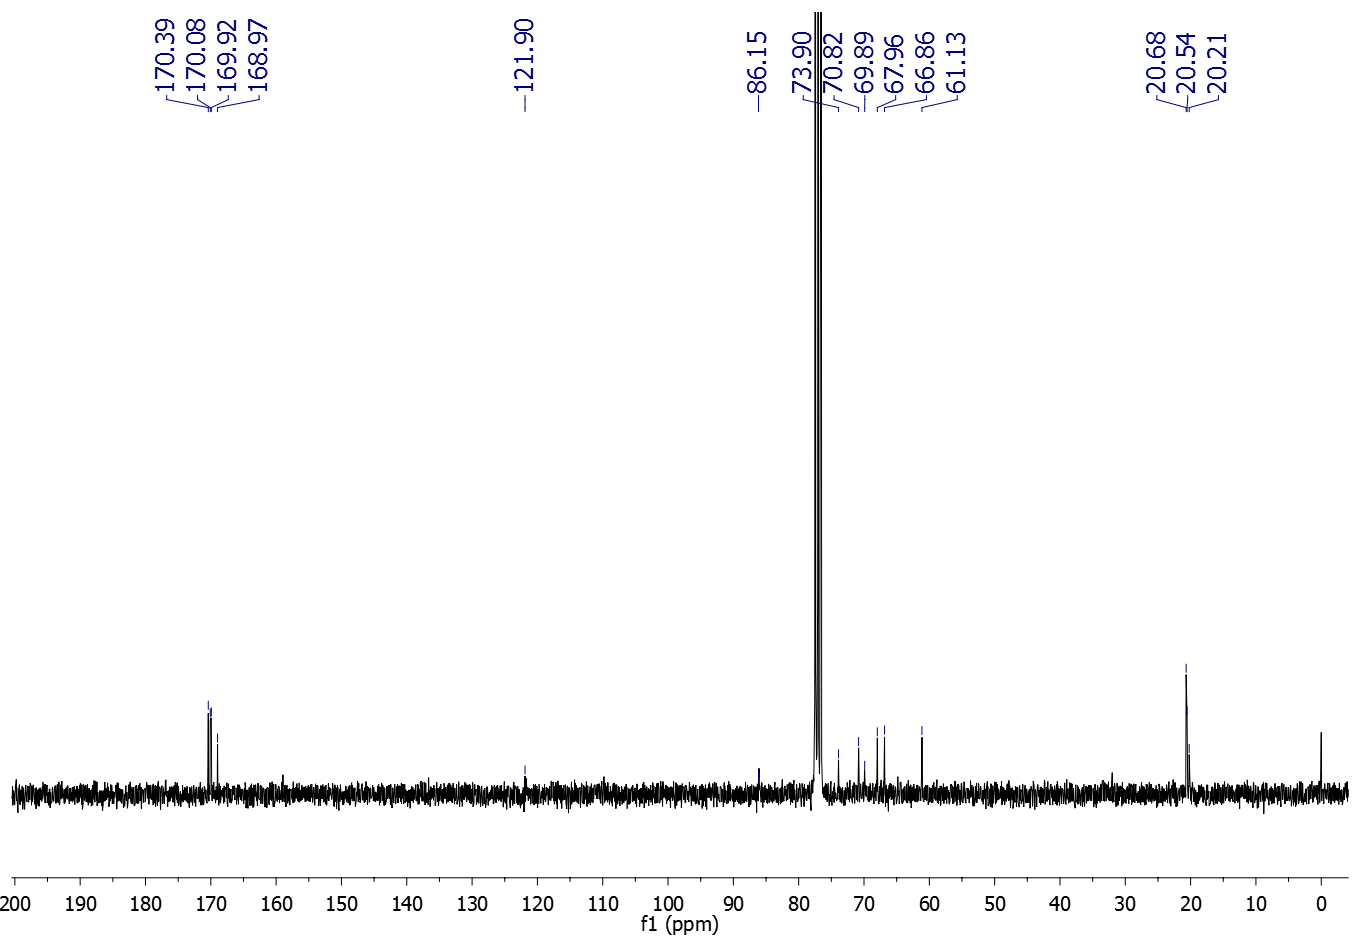


**Fig. S26 A.** 13C NMR (75 MHz, CDCl3) spectrum of compound **18**.


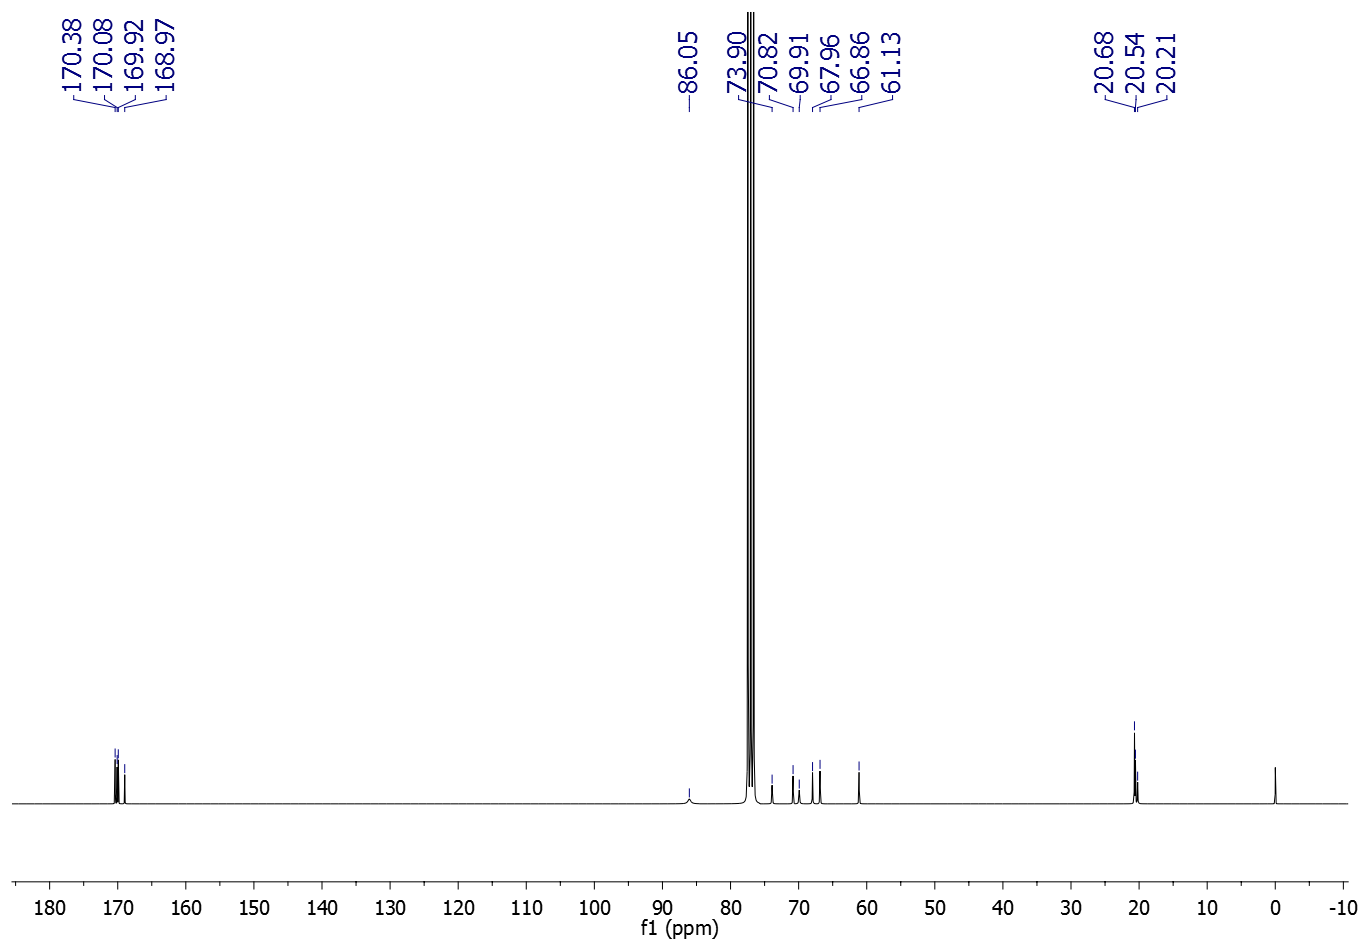


**Fig. S26 B.** 13C NMR spectrum (75 MHz, CDCl3) of compound **18** after deconvolution with Lorentzian shape with detection sensitivity set to 1.4 and peak overlapping factor of 0.5 ppm (Software: Bruker TopSpin 2.1).


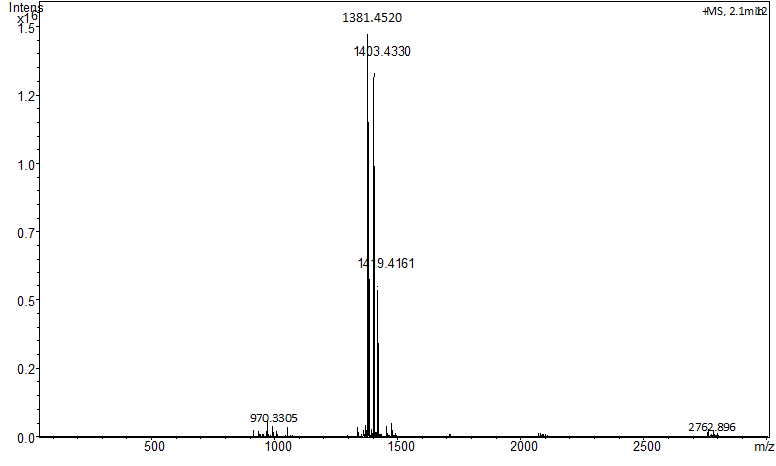


**Fig. S27.** HRMS (ESI) analysis of compound **18**: *m*/*z*[M+H]+ calculated for C55H73N12O30+1381.4550; found: 1381.4520; [M+Na]+ calculated for C55H72NaN12O35+1403.3070, found: 1403.4330; [M+K]+ calculated for C55H72KN12O35+1419.4109, found: 1419.4161.


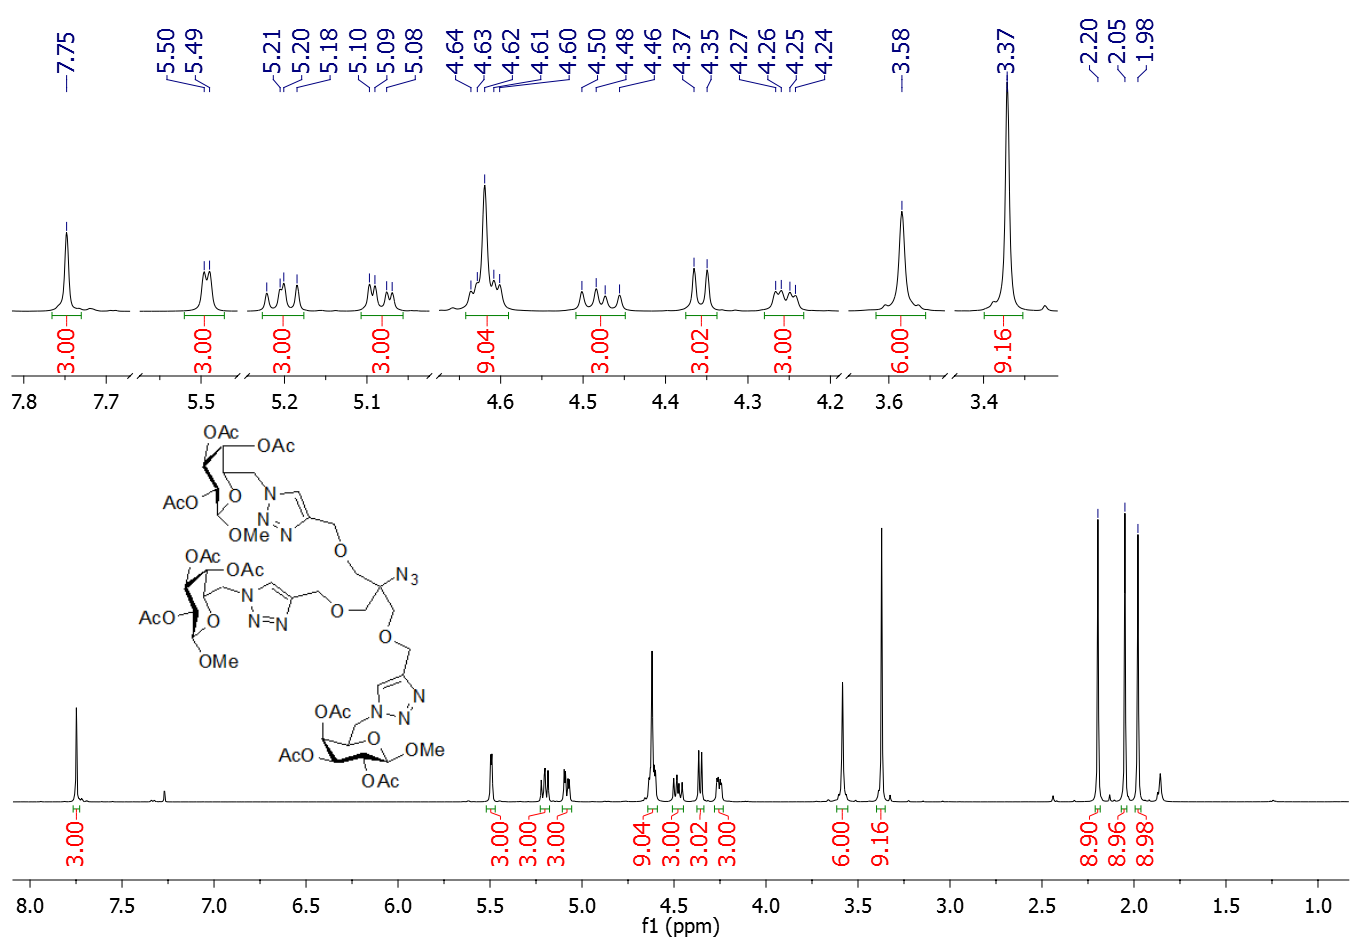


**Fig. S28.** 1H NMR spectrum (500 MHz, CDCl3) of compound **19**.


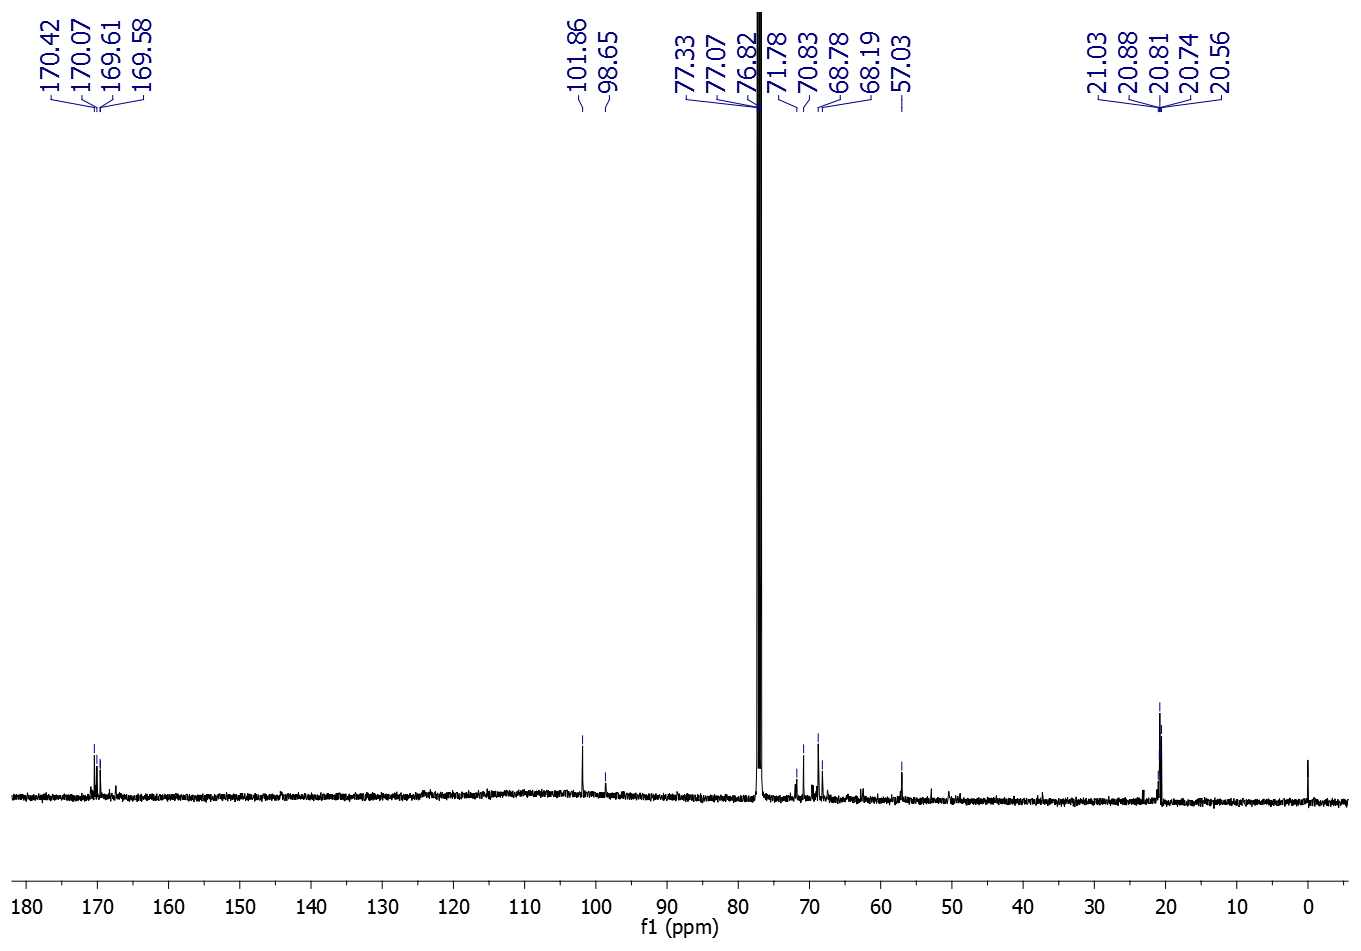


**Fig. S29 A.** 13C NMR (125 MHz, CDCl3) spectrum of compound **19**.


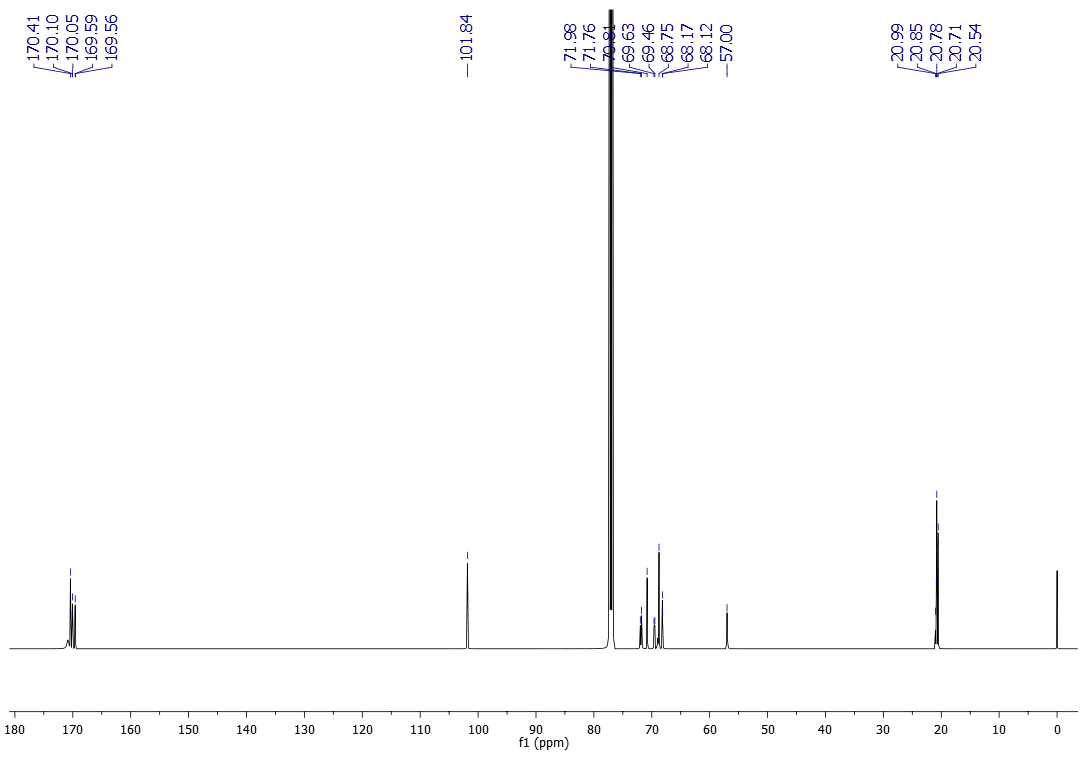


**Fig. S29 B.** 13C NMR spectrum (125 MHz, CDCl3) of compound **19** after deconvolution with Lorentzian shape with detection sensitivity set to 1.4 and peak overlapping factor of 0.5 ppm (Software: Bruker TopSpin 2.1).


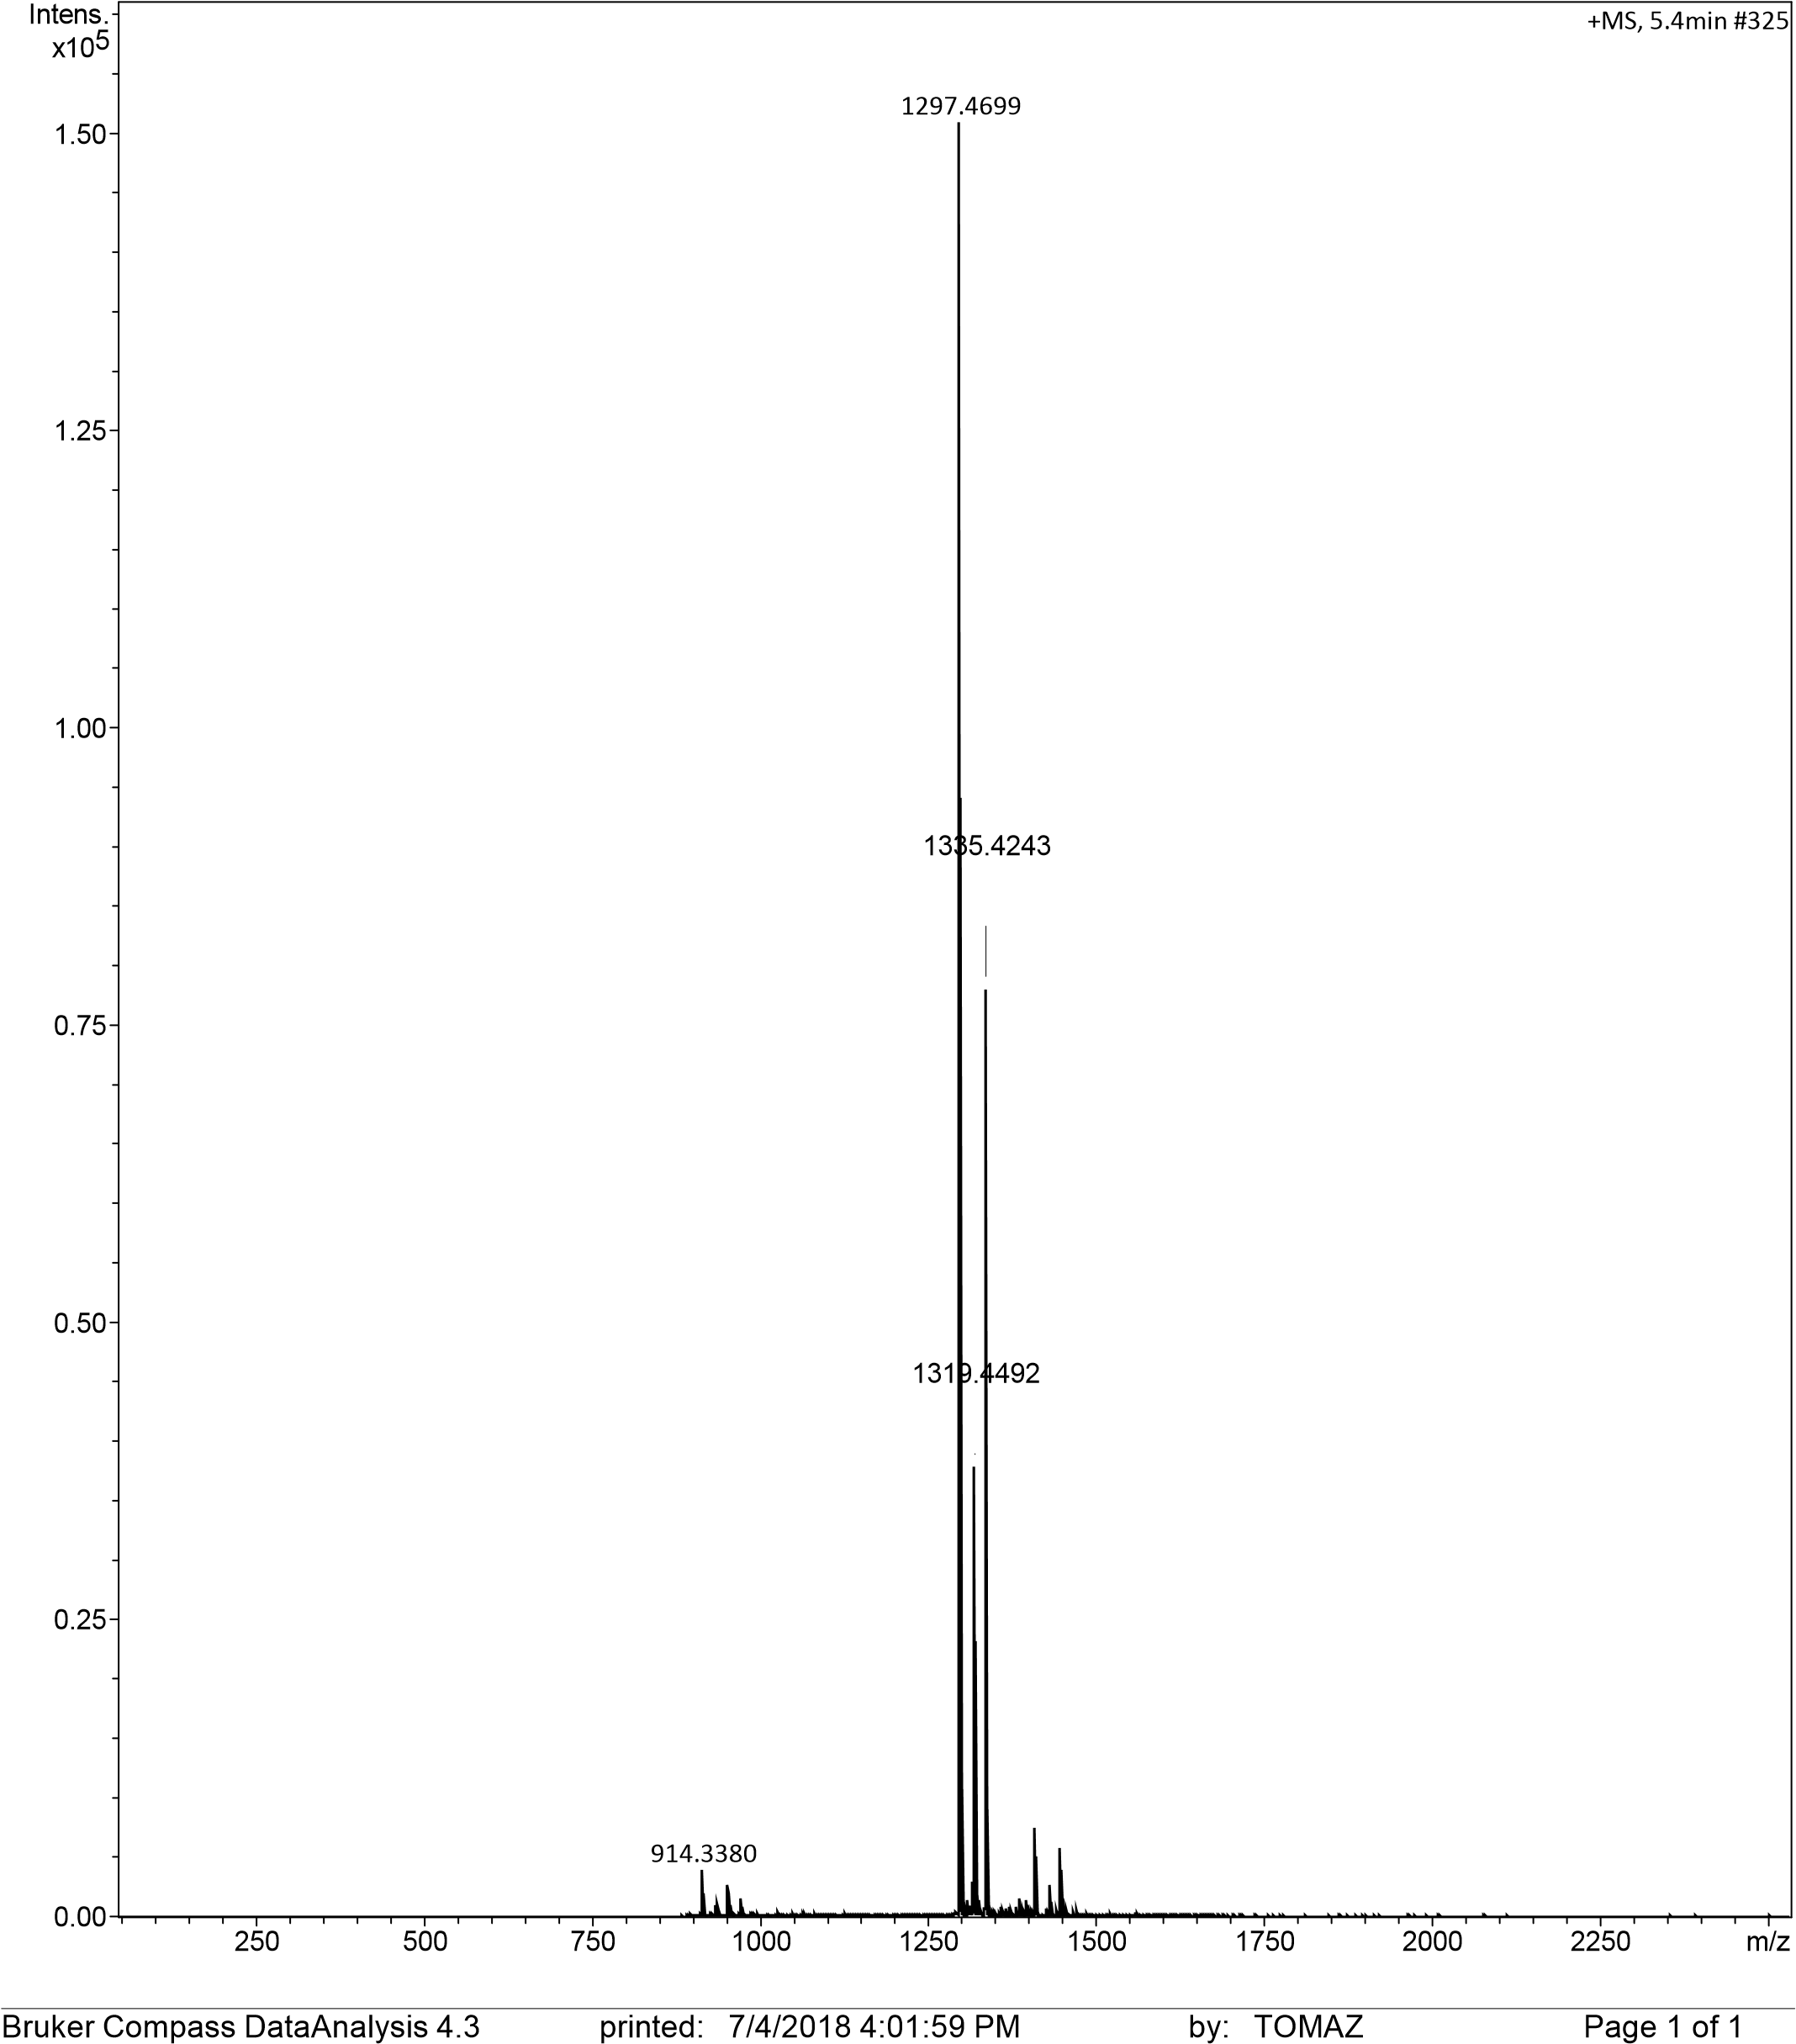


**Fig. S30.** ESI MS analysis of compound **19**: *m*/*z*[M+H]+ calculated for C52H73N12O27+1297.4703; found: 1297.4699; [M+Na]+ calculated for C52H72N12NaO27+ 1319.4522, found: 1319.4492; [M+K]+ calculated for C52H72KN12O27+1345.4261, found: 1345.4243.


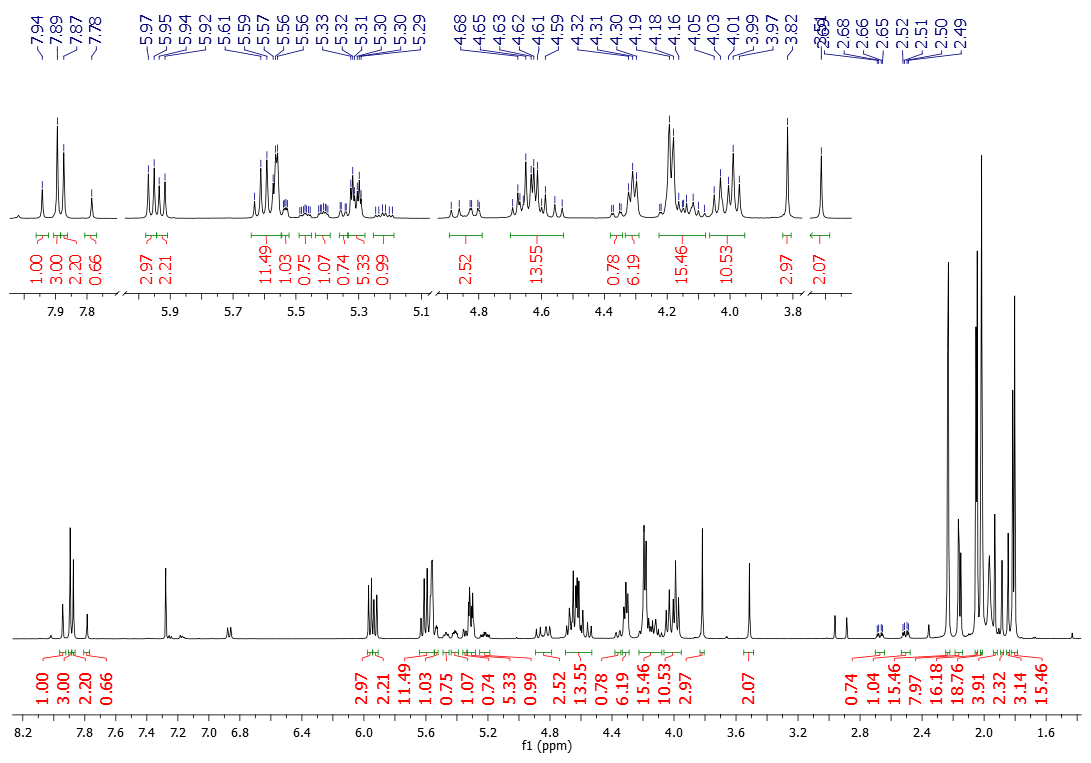


**Fig. S31.** 1H NMR (500 MHz, CDCl3) spectrum of glycocluster **21**.


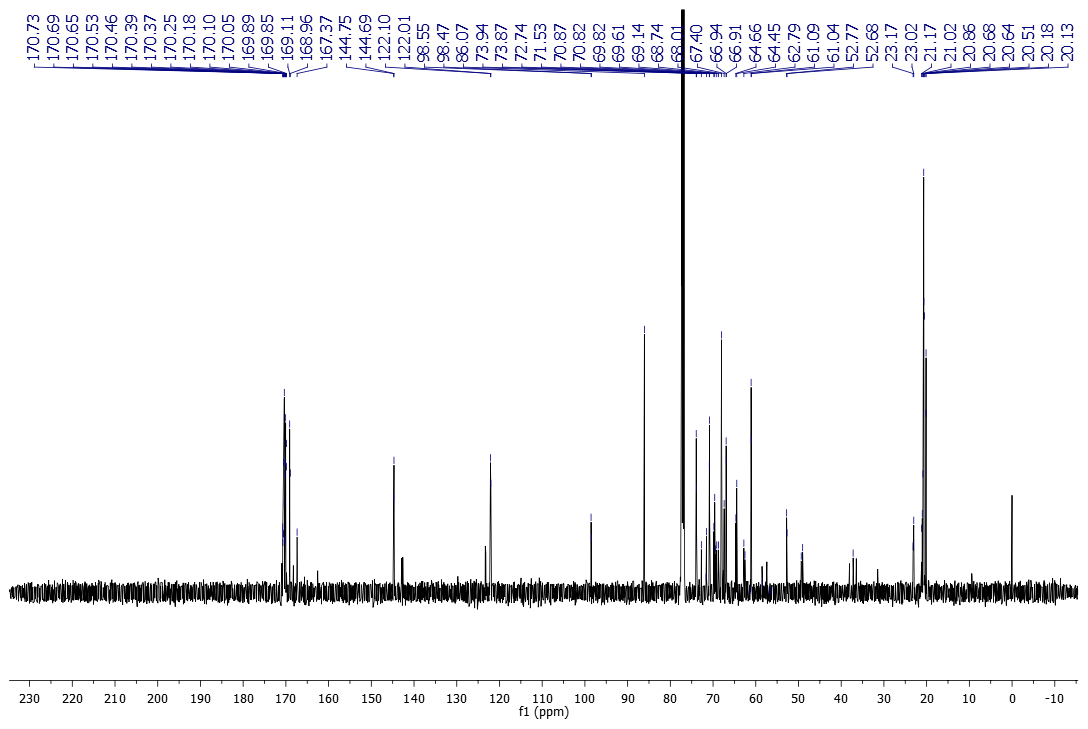


**Fig. S32.** 13C NMR (125 MHz, CDCl3) spectrum of glycocluster **21**.


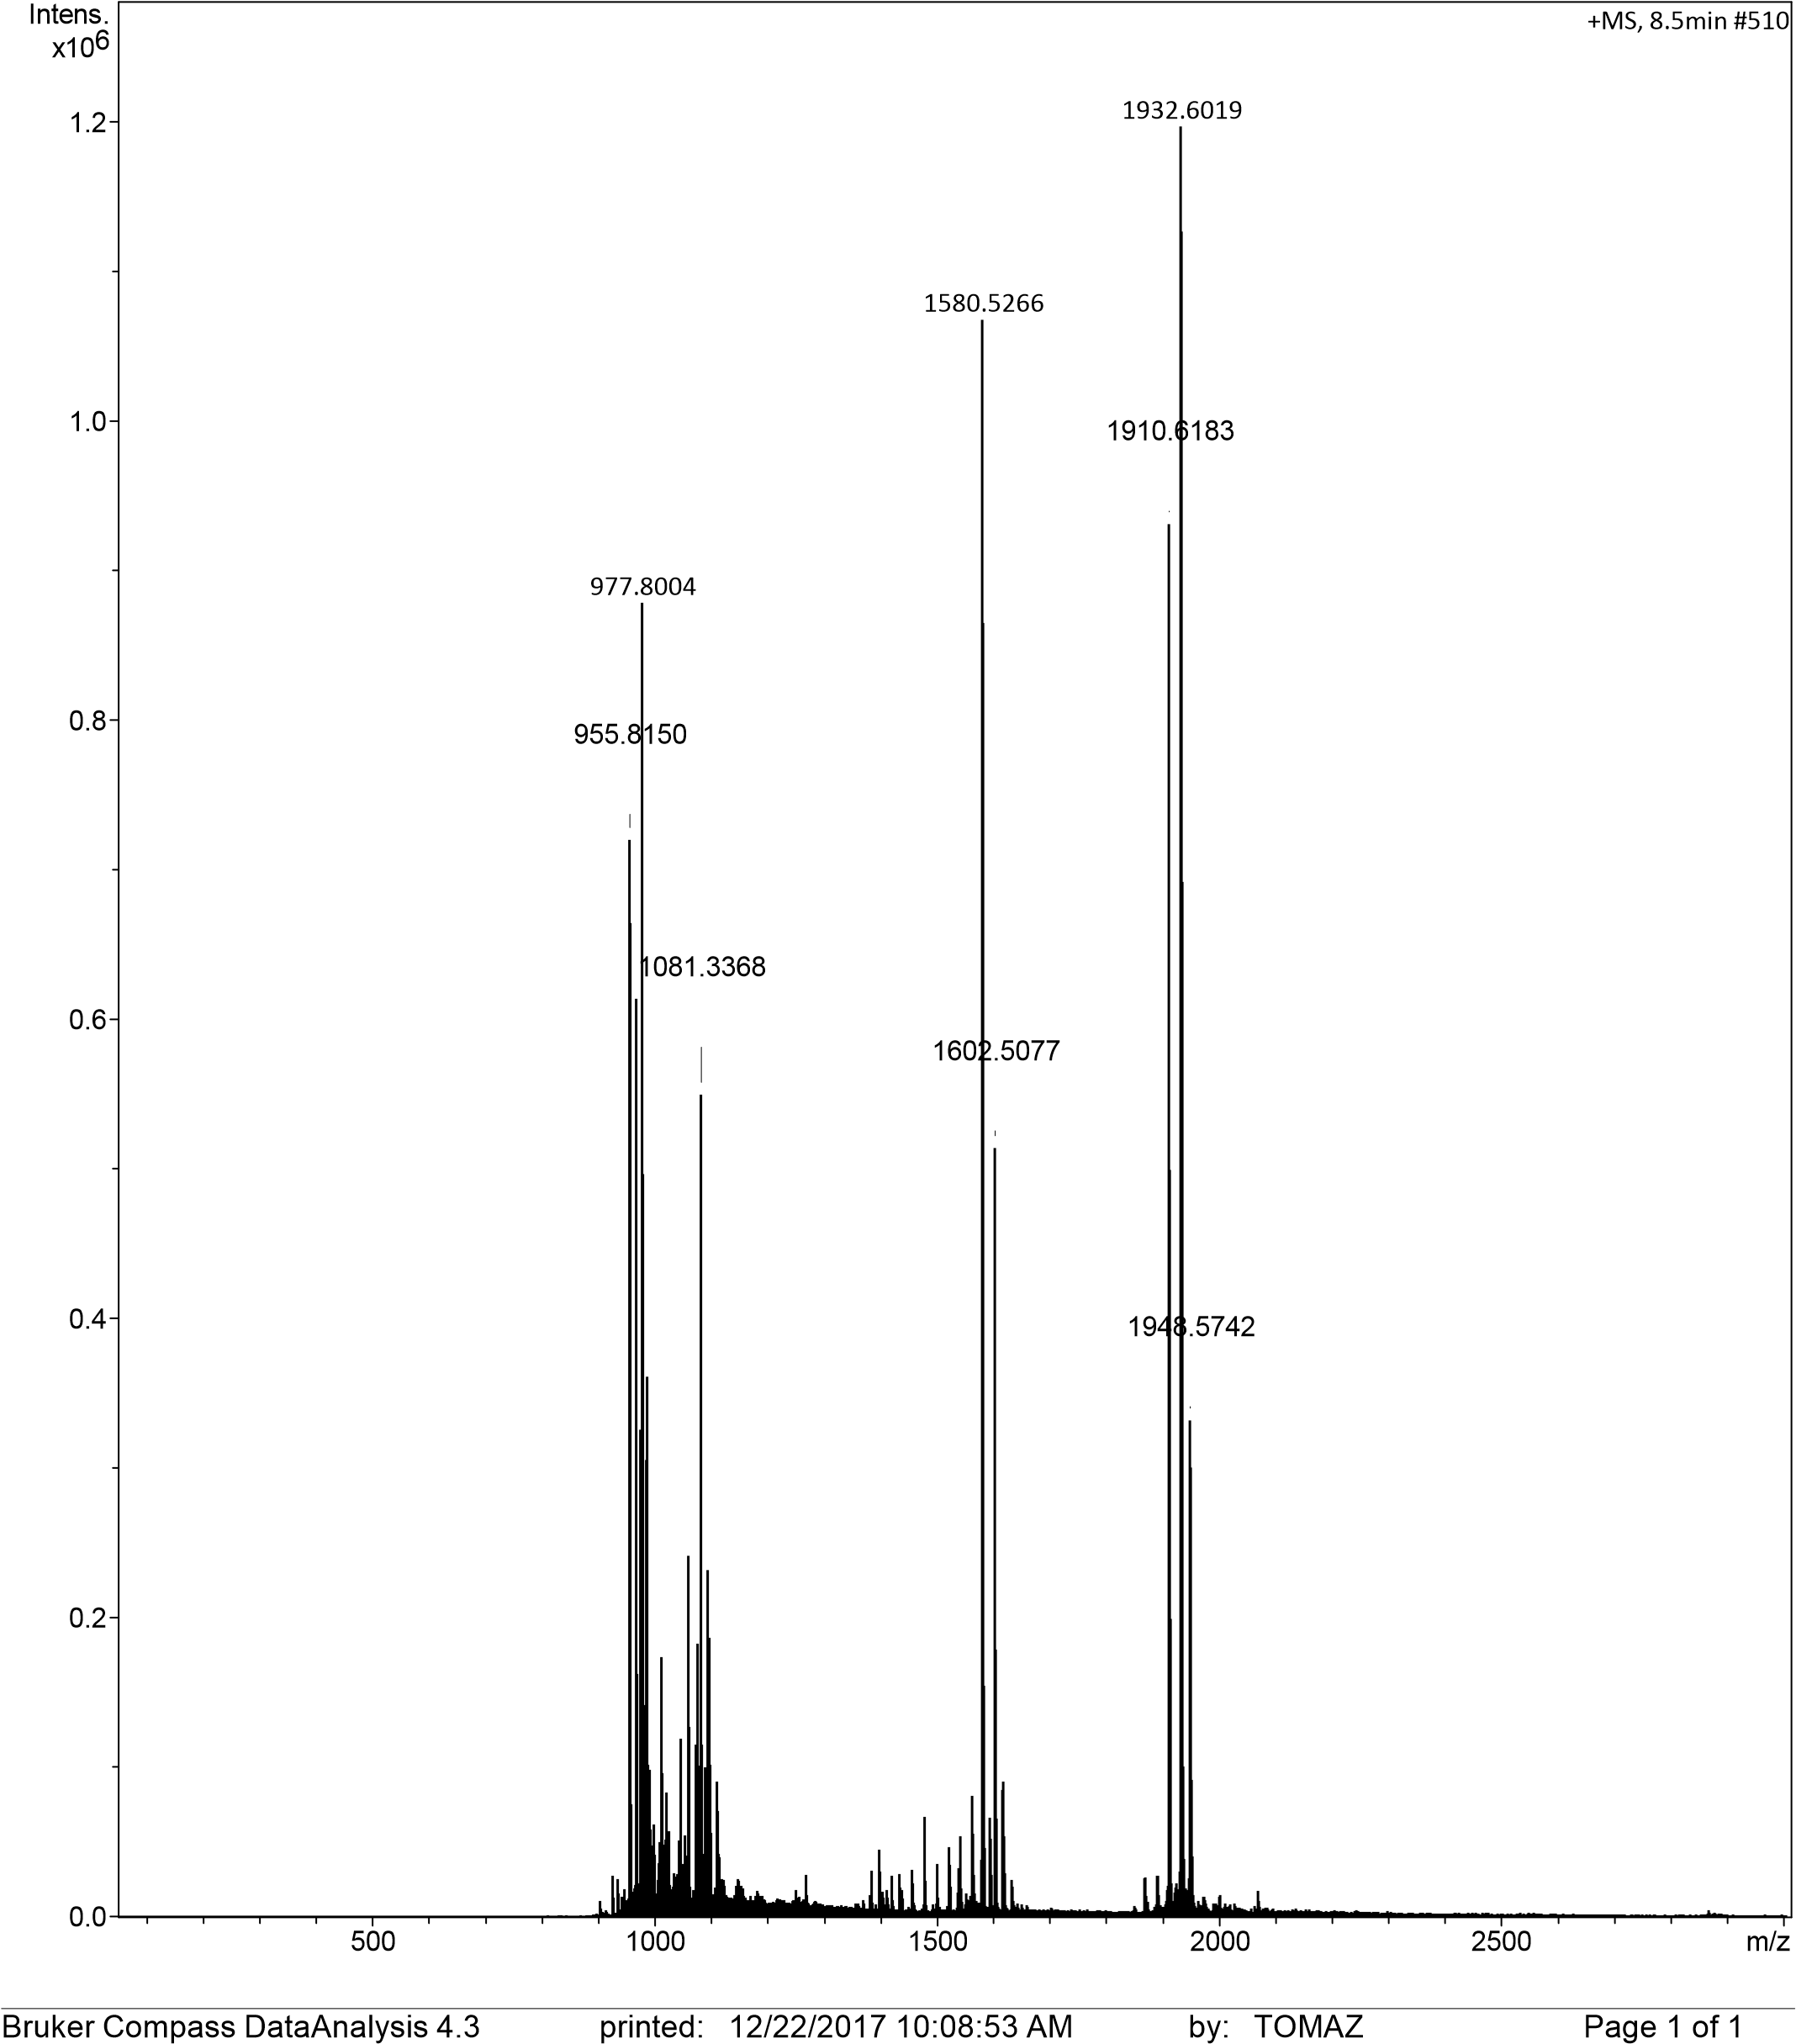


**Fig. S33.** ESI MS analysis of glycocluster **21**: *m*/*z*[M+Na]+ calculated for C78H103NaN13O43+ 1932.6165; found: 1932.6019; [M+K]+ calculated for C78H103KN13O43+ 1948.5804; found: 1948.5742.


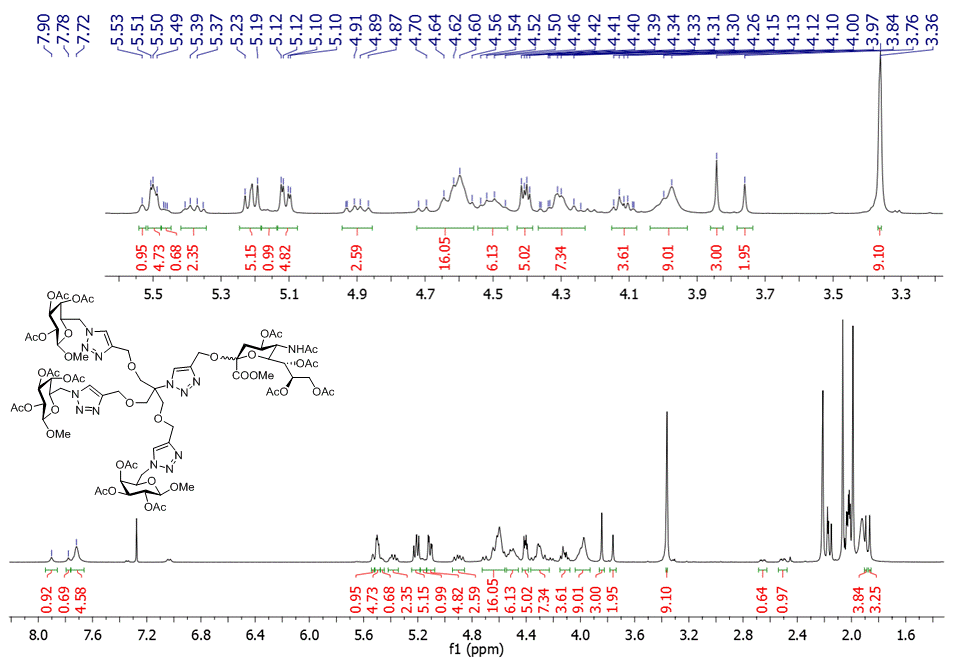


**Fig. S34.** 1H NMR spectrum (500 MHz, CDCl3) of compound **22**.

**Fig. S35 A.** 13C NMR (125 MHz, CDCl3) spectrum of compound **22**.


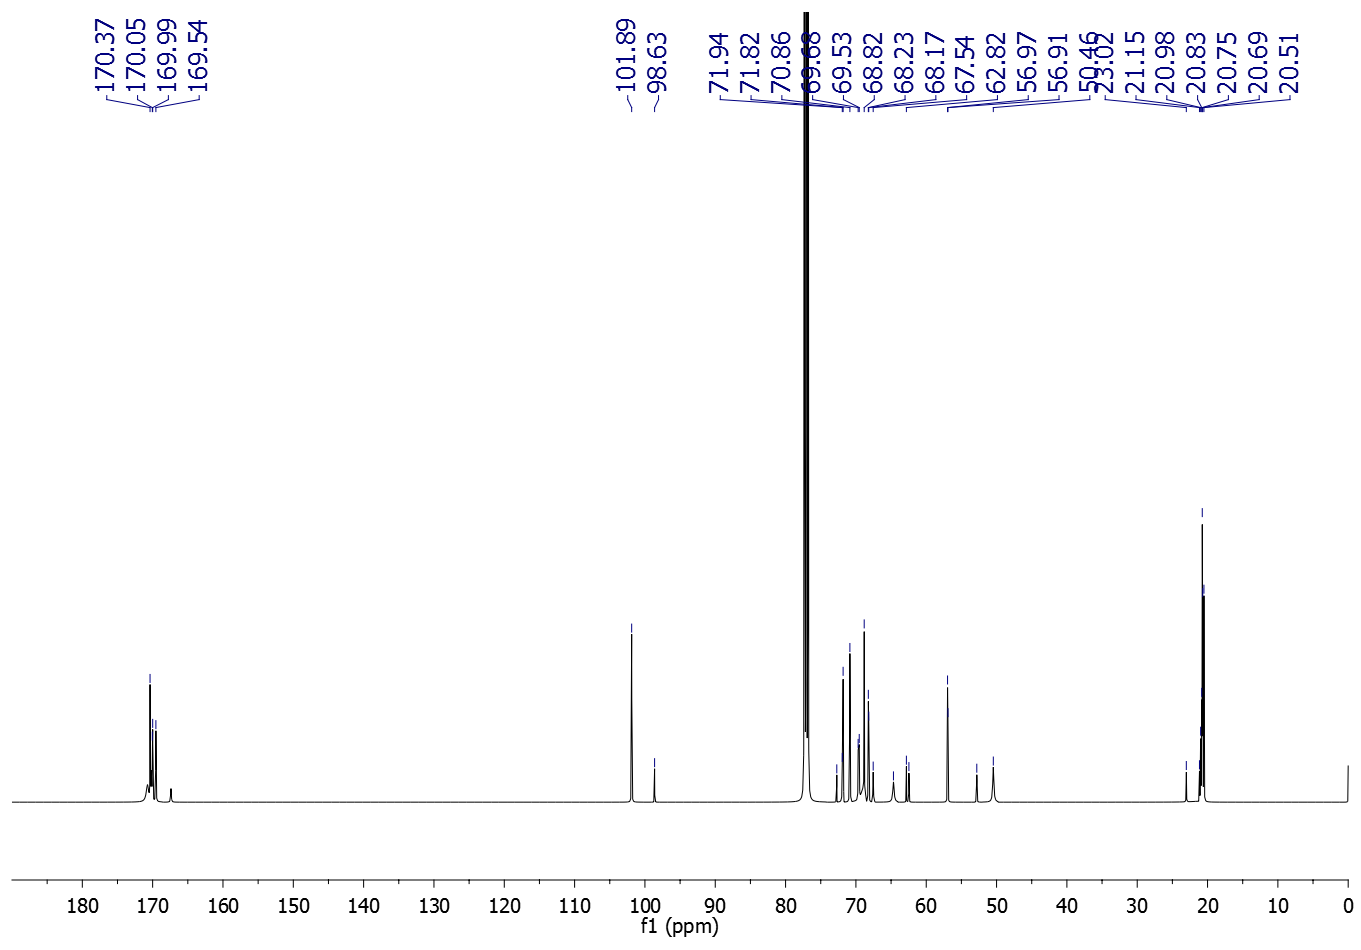


**Fig. S35 B.** 13C NMR spectrum (125 MHz, CDCl3) of compound **22** after deconvolution with Lorentzian shape with detection sensitivity set to 1.4 and peak overlapping factor of 0.5 ppm (Software: Bruker TopSpin 2.1).


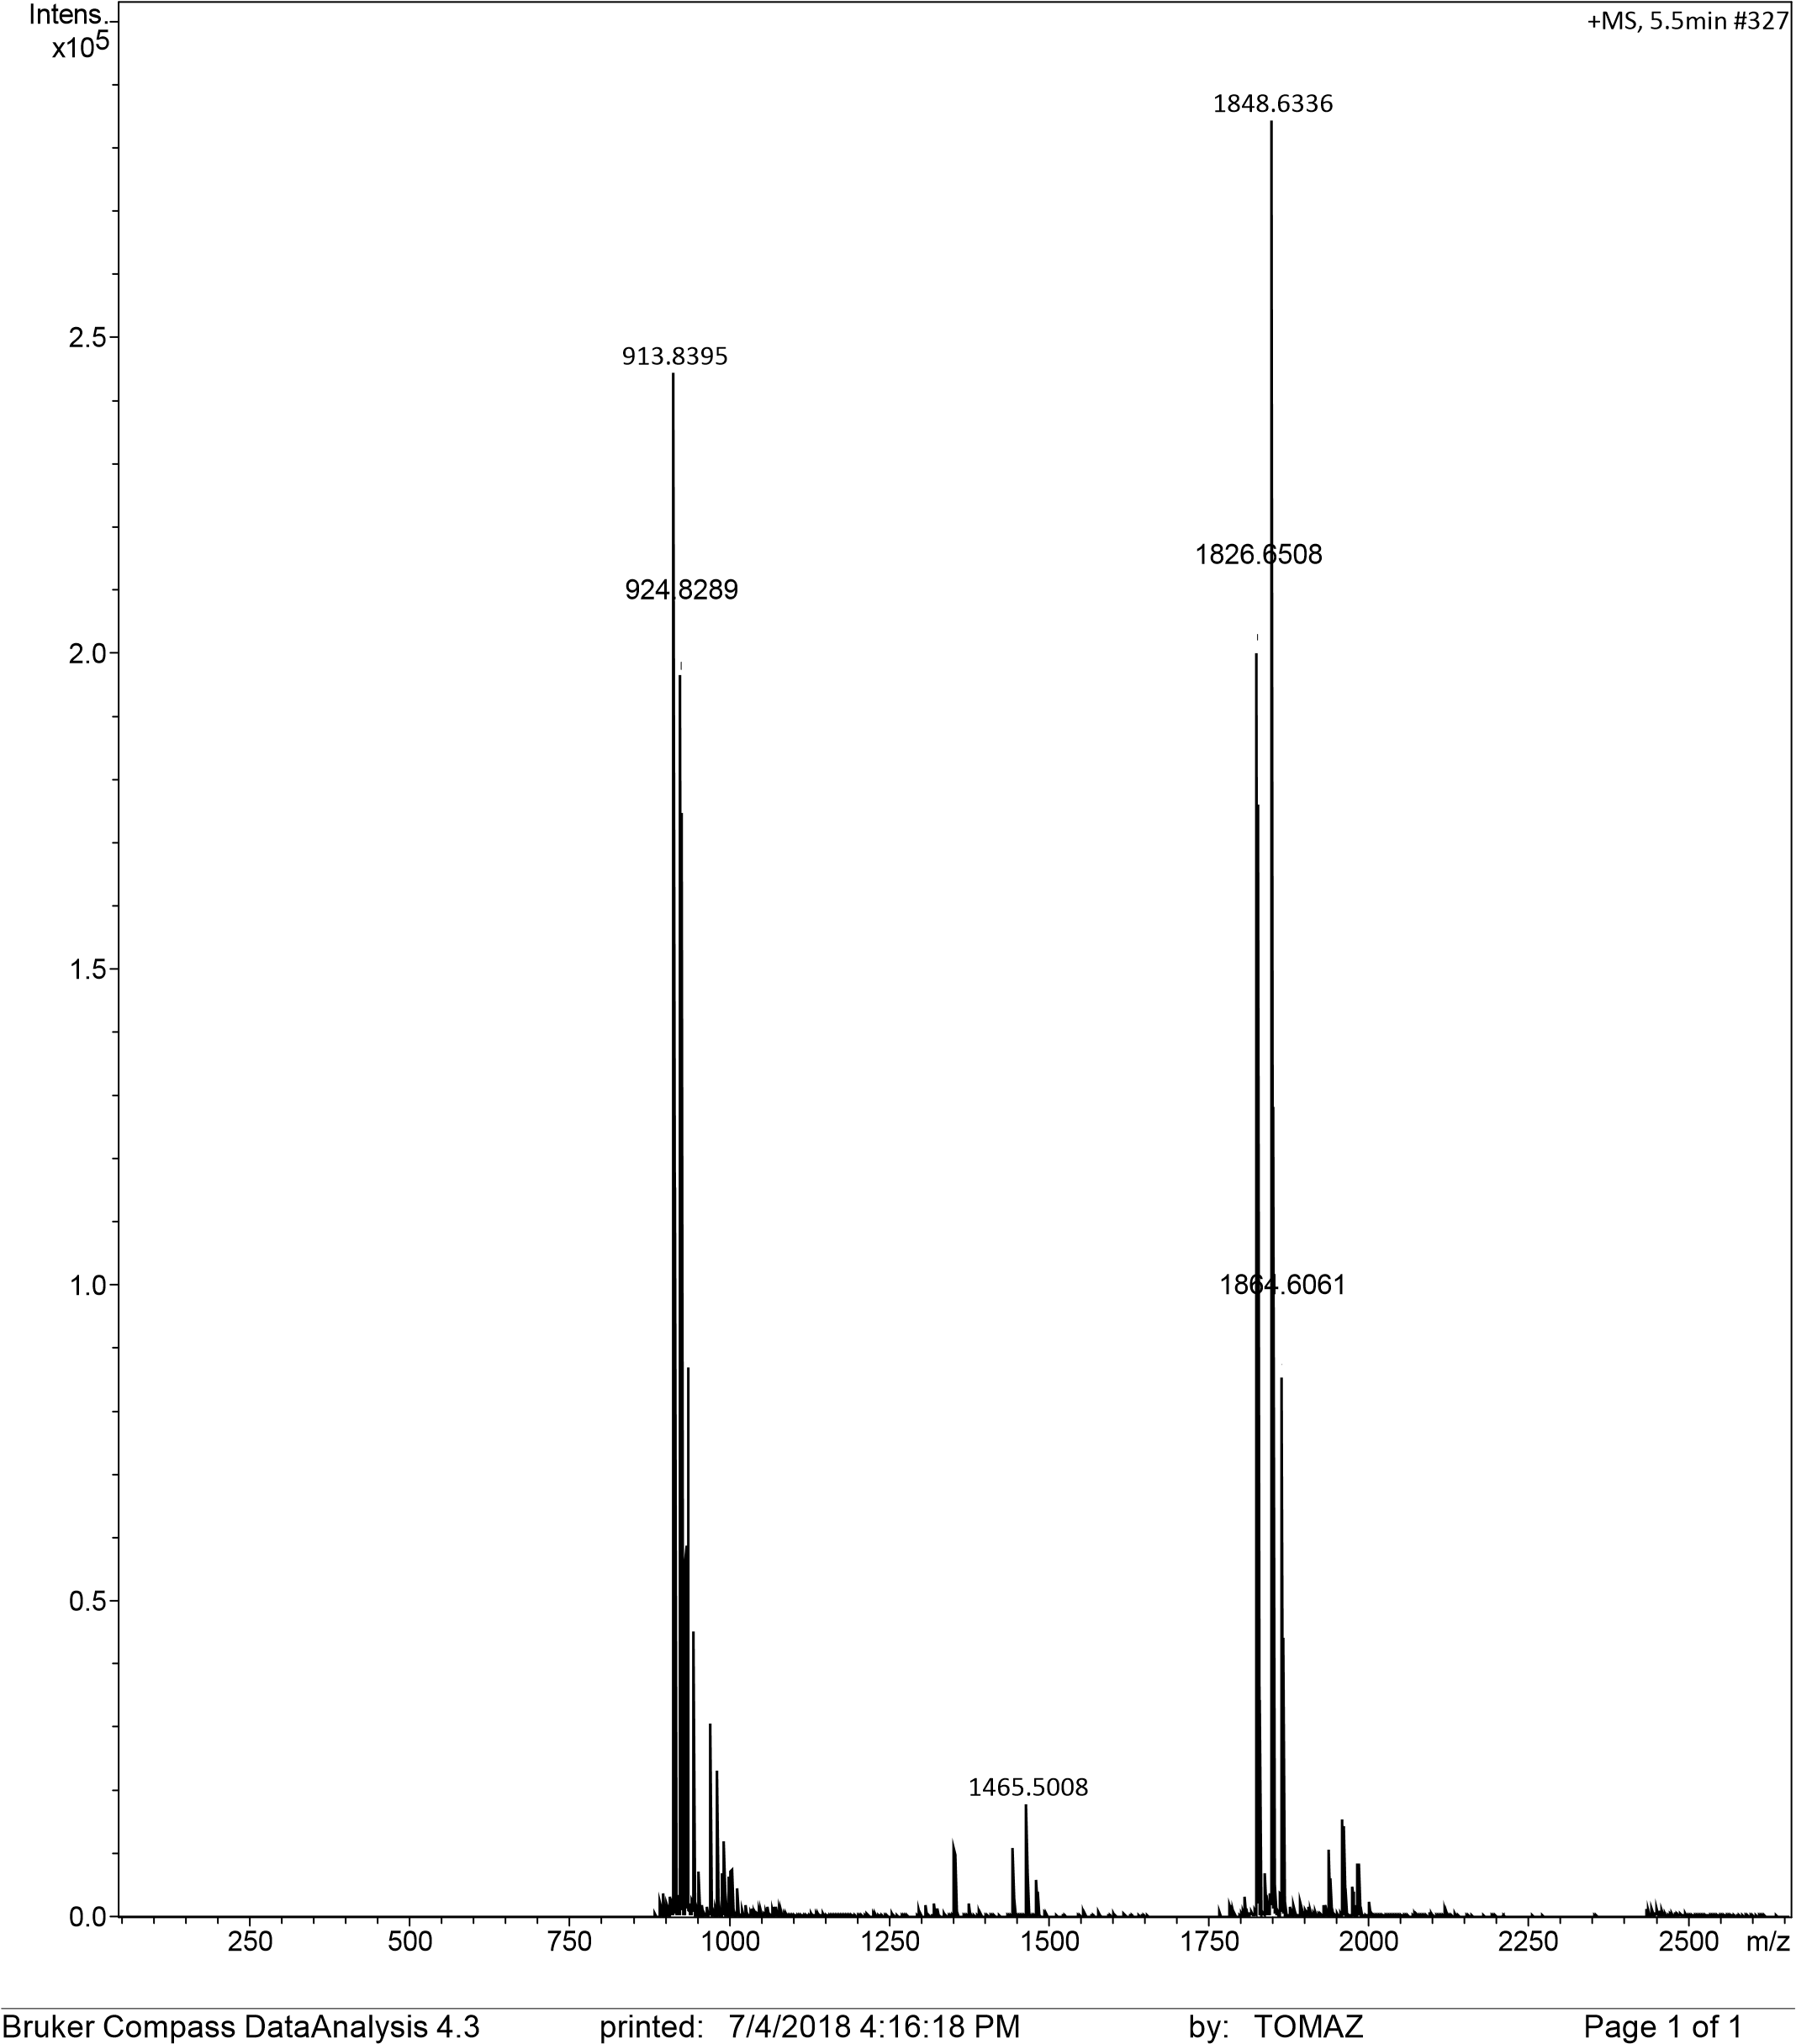


**Fig. S36.** ESI MS analysis of compound **22**: *m*/*z*[M+Na]+ calculated for C75H103NaN13NaO40+ 1848.6317; found: 1848.6336; [M+K]+ calculated for C75H103KN13NaO40+ 1864.6057, found: 1864.6061.


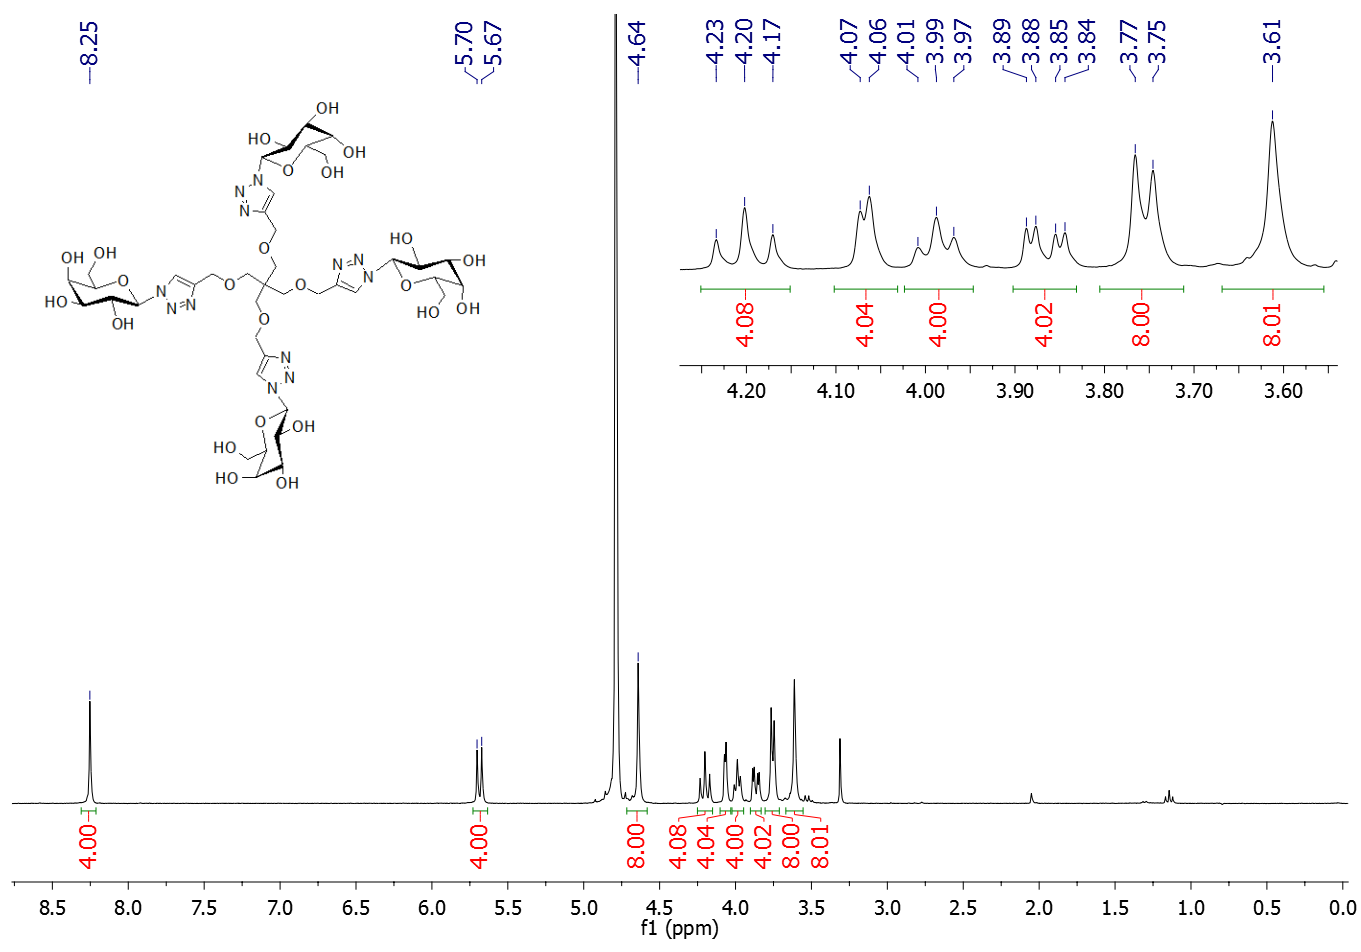


**Fig. S37.** 1H NMR (300 MHz, D2O) spectrum of glycocluster **1**.


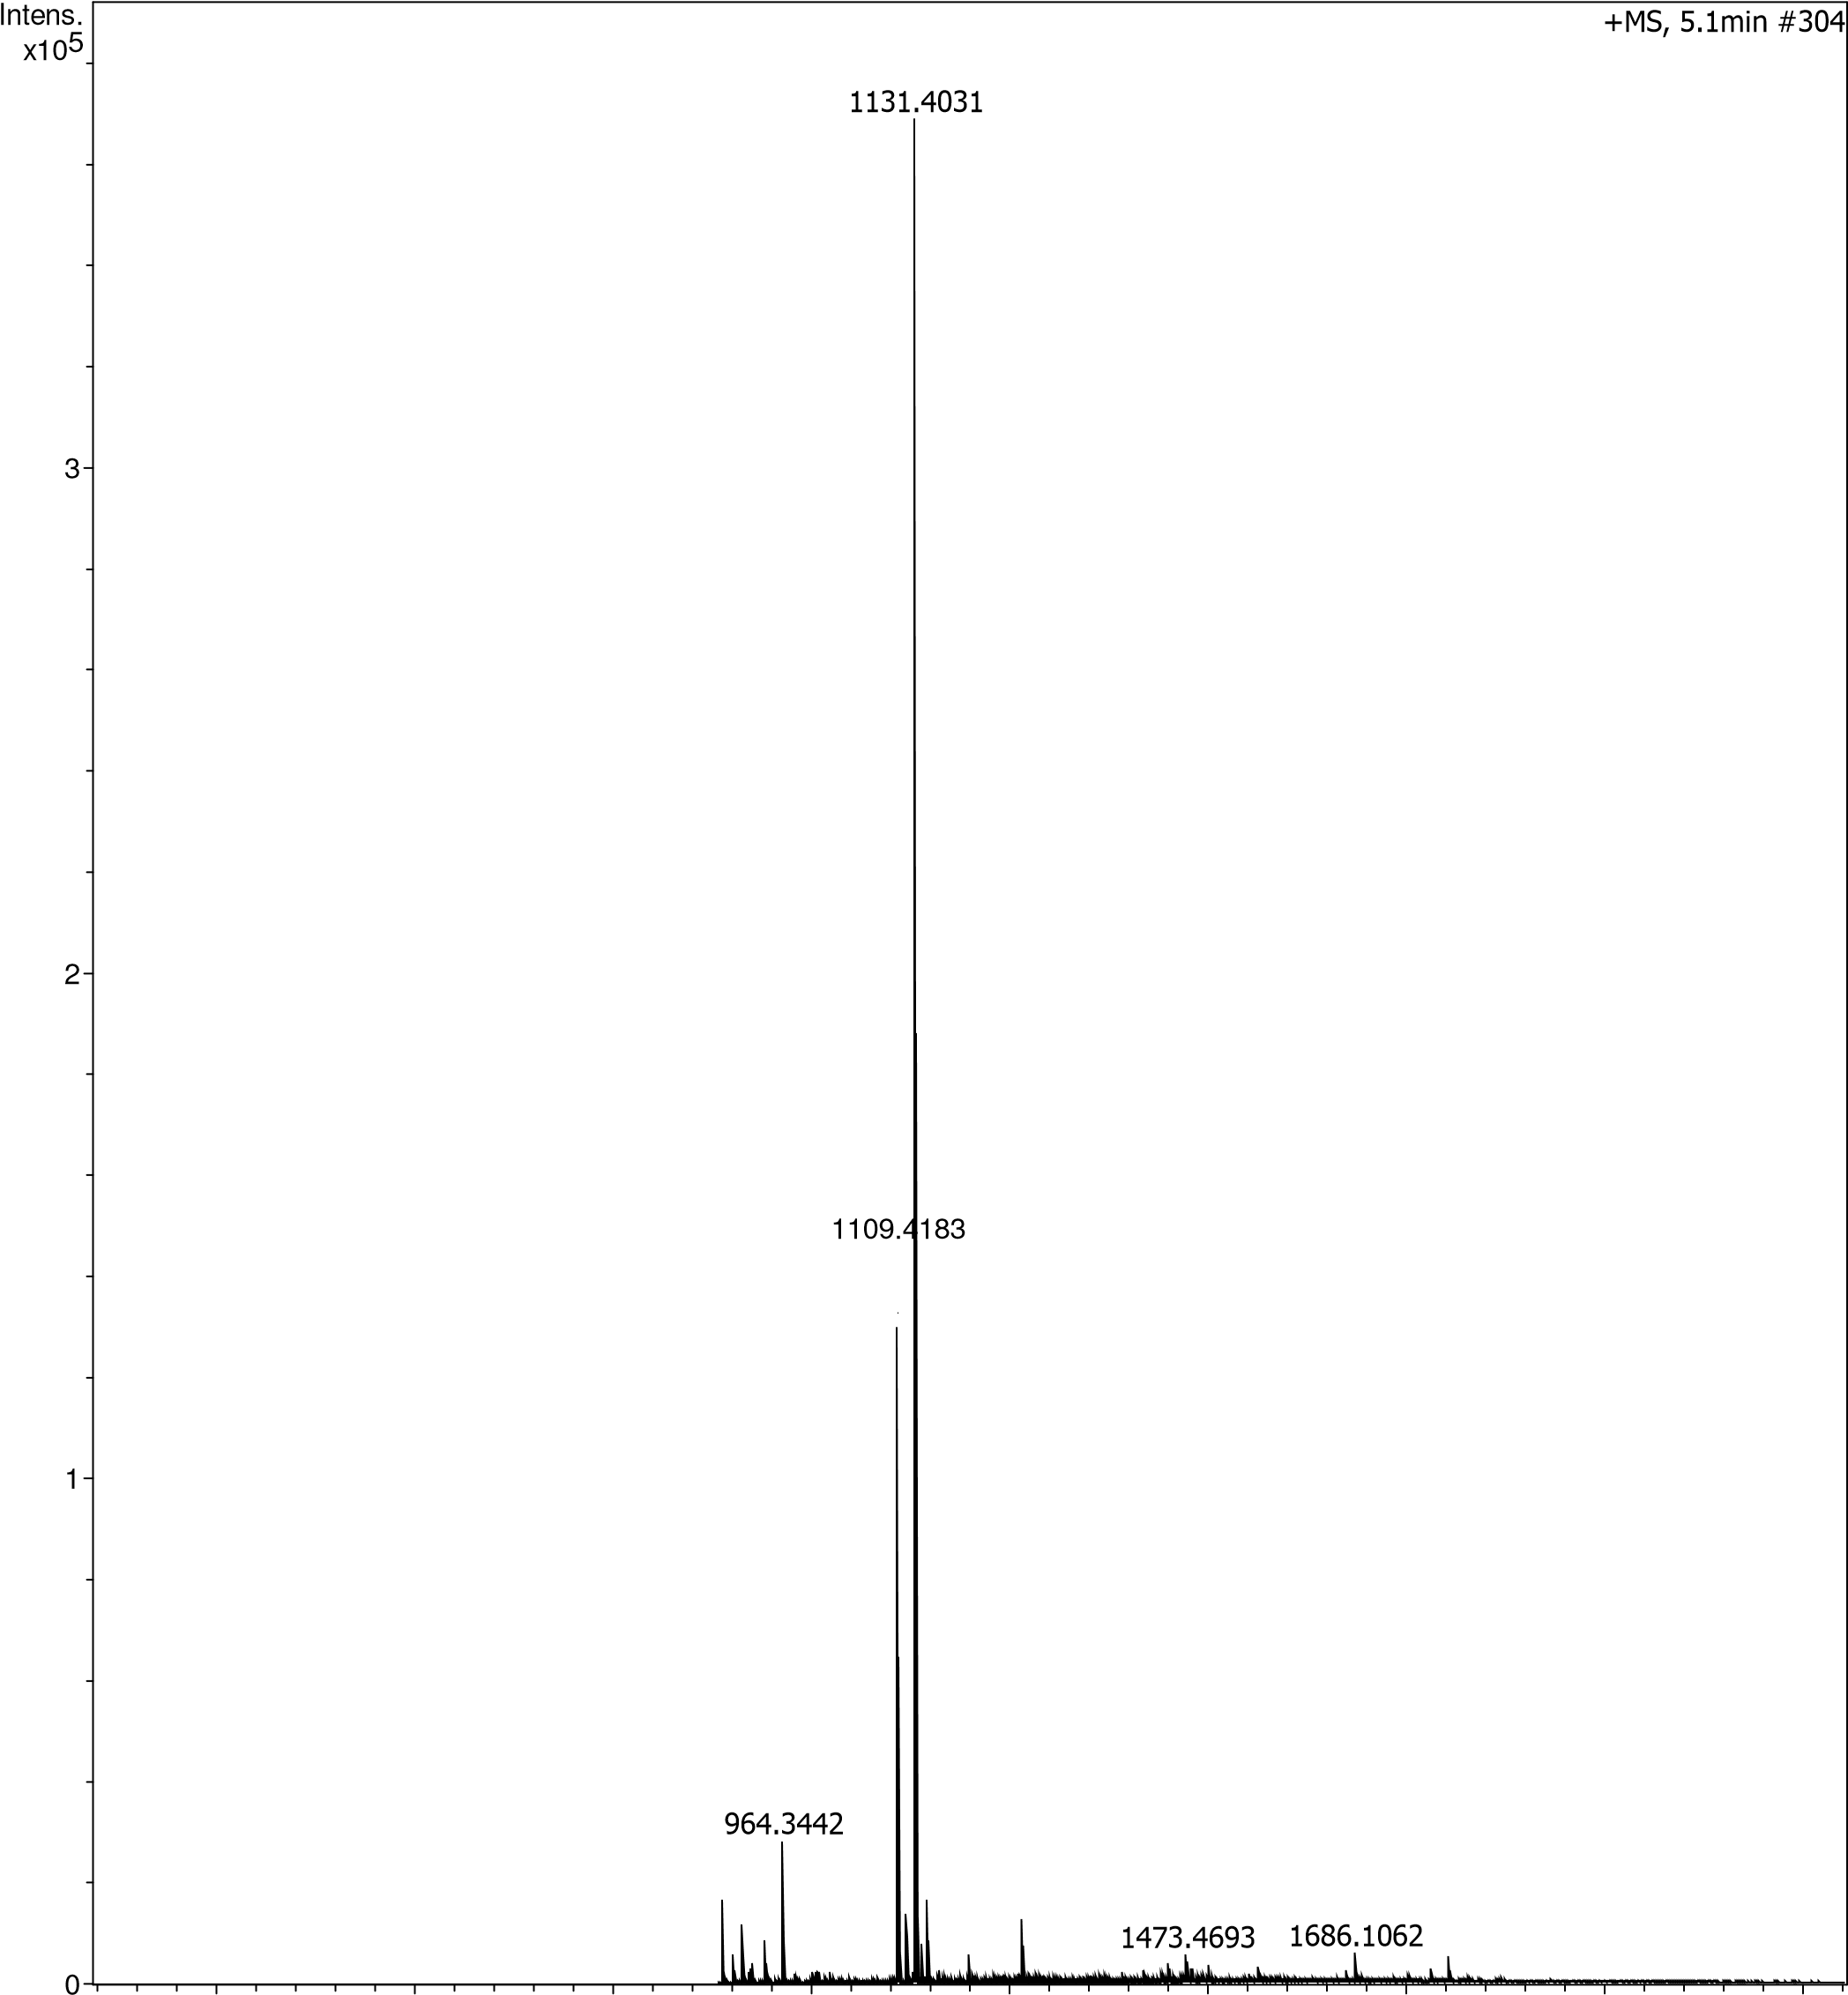


**Fig. S38.** HRMS (ESI) analysis of glycocluster **1**: *m*/*z*[M+Na]+ calculated for C41H64N12NaO24+  1131.4049; found: 1131.4031.


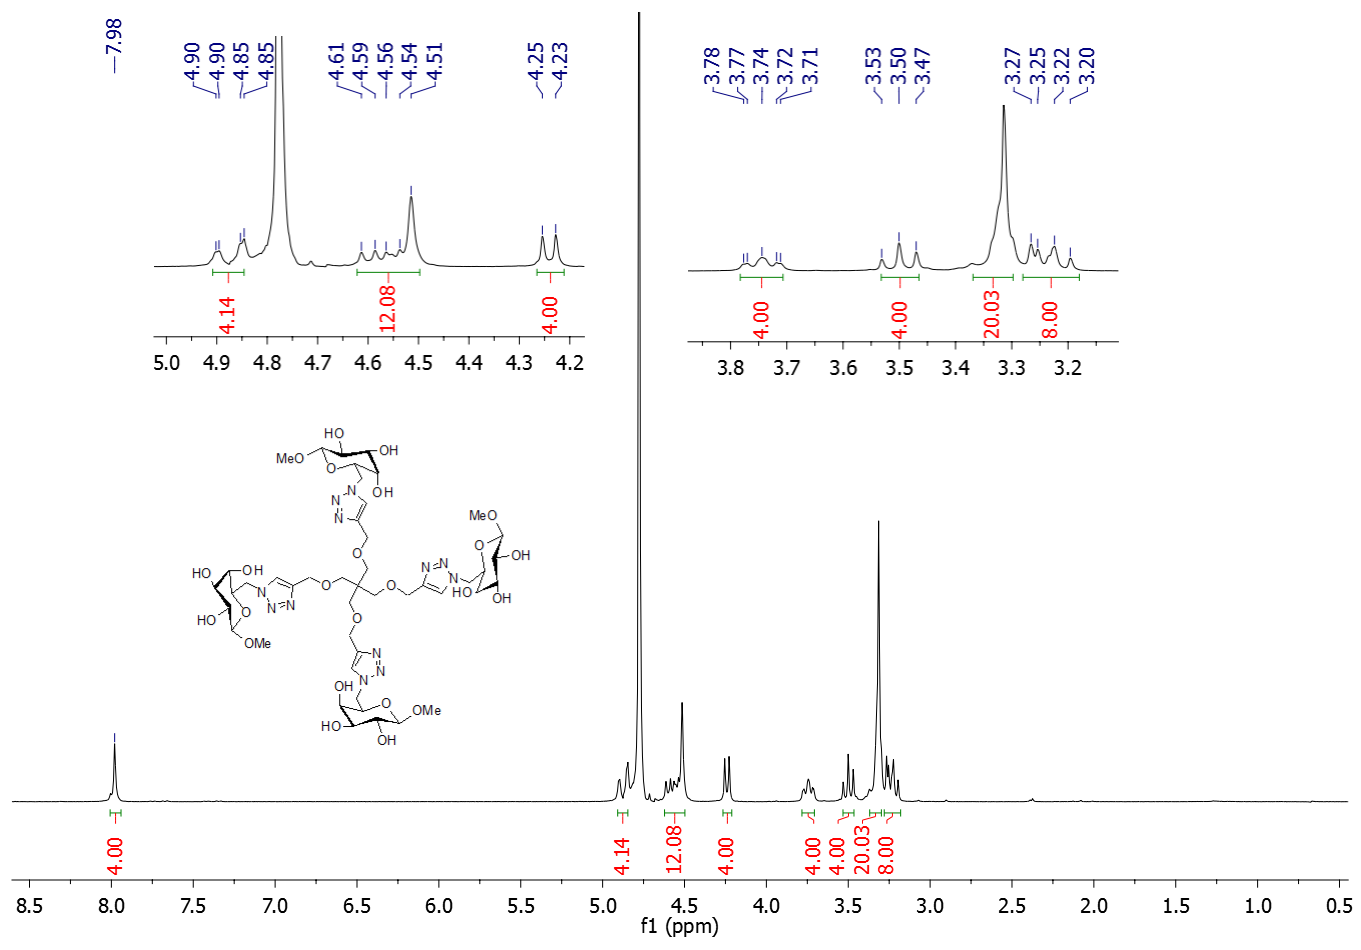


**Fig. S39.** 1H NMR spectrum of glycocluster **2**.


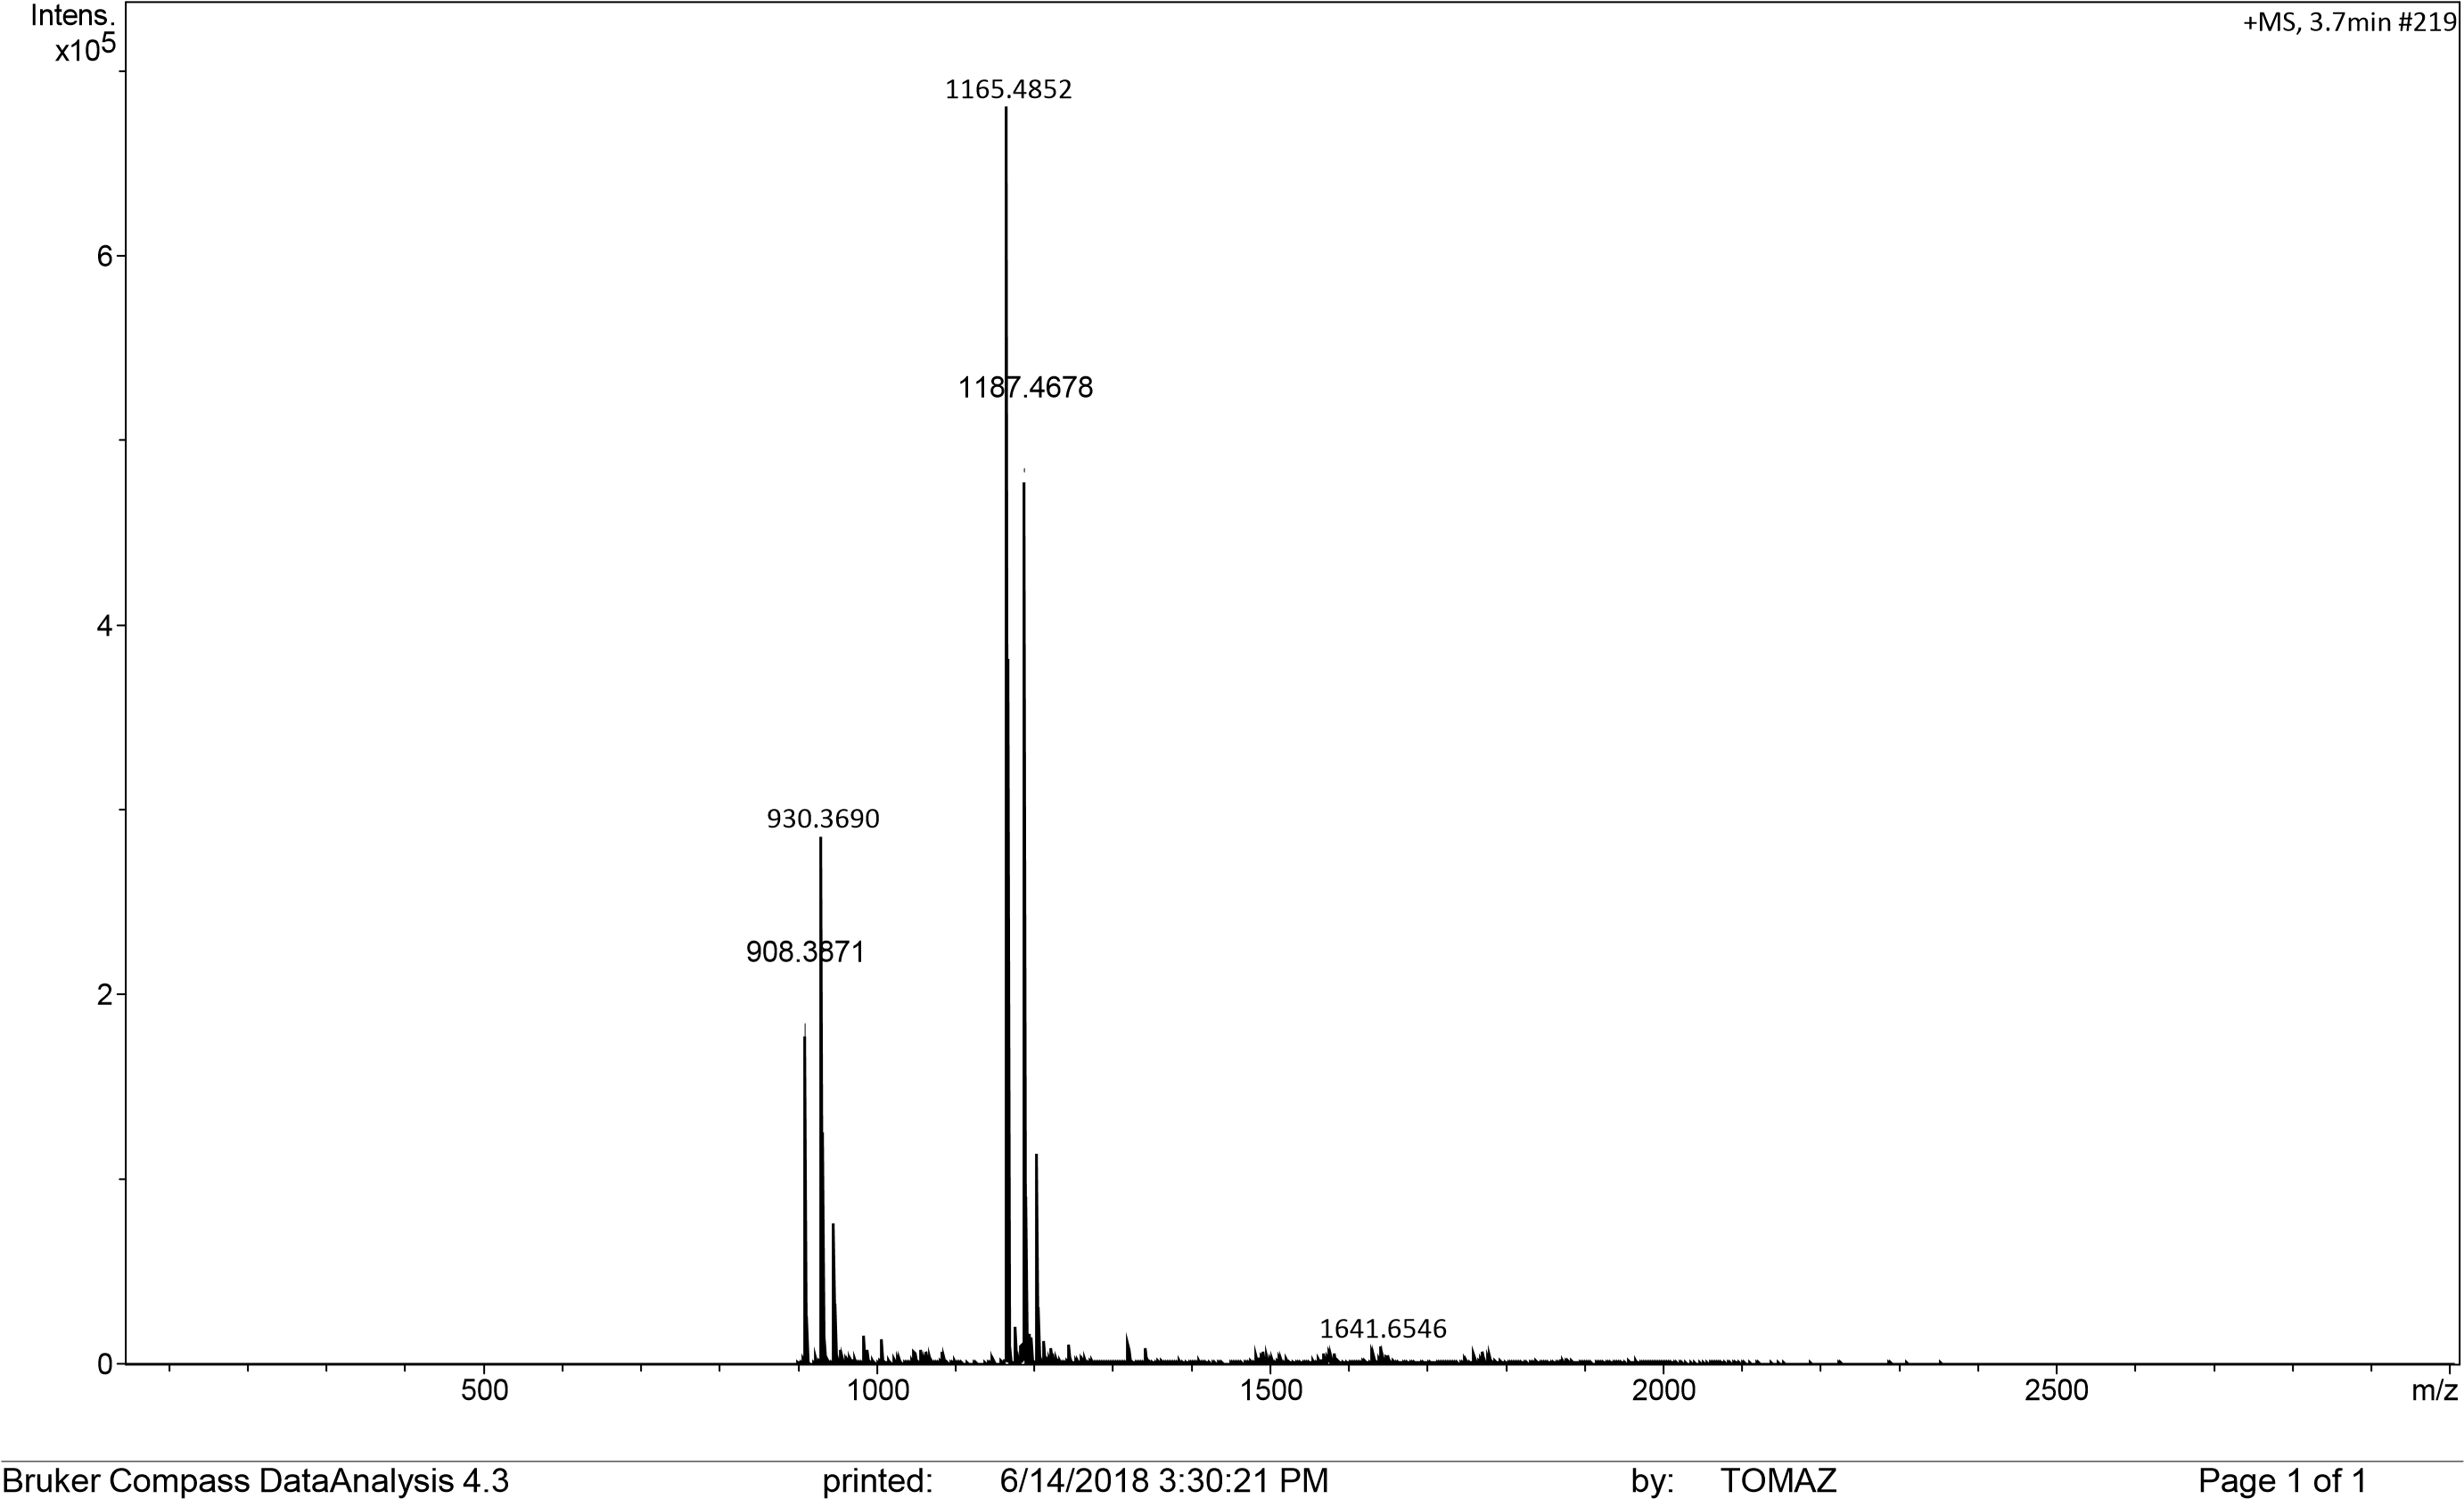


**Fig. S40.** HRMS (ESI) analysis of compound **2**: *m*/*z*[M+H]+ calculated for C45H73N12O24+1165.4855; found: 1165.4852; [M+Na]+ calculated for C45H72NaN12O24+1187.4675, found: 1187.4678.


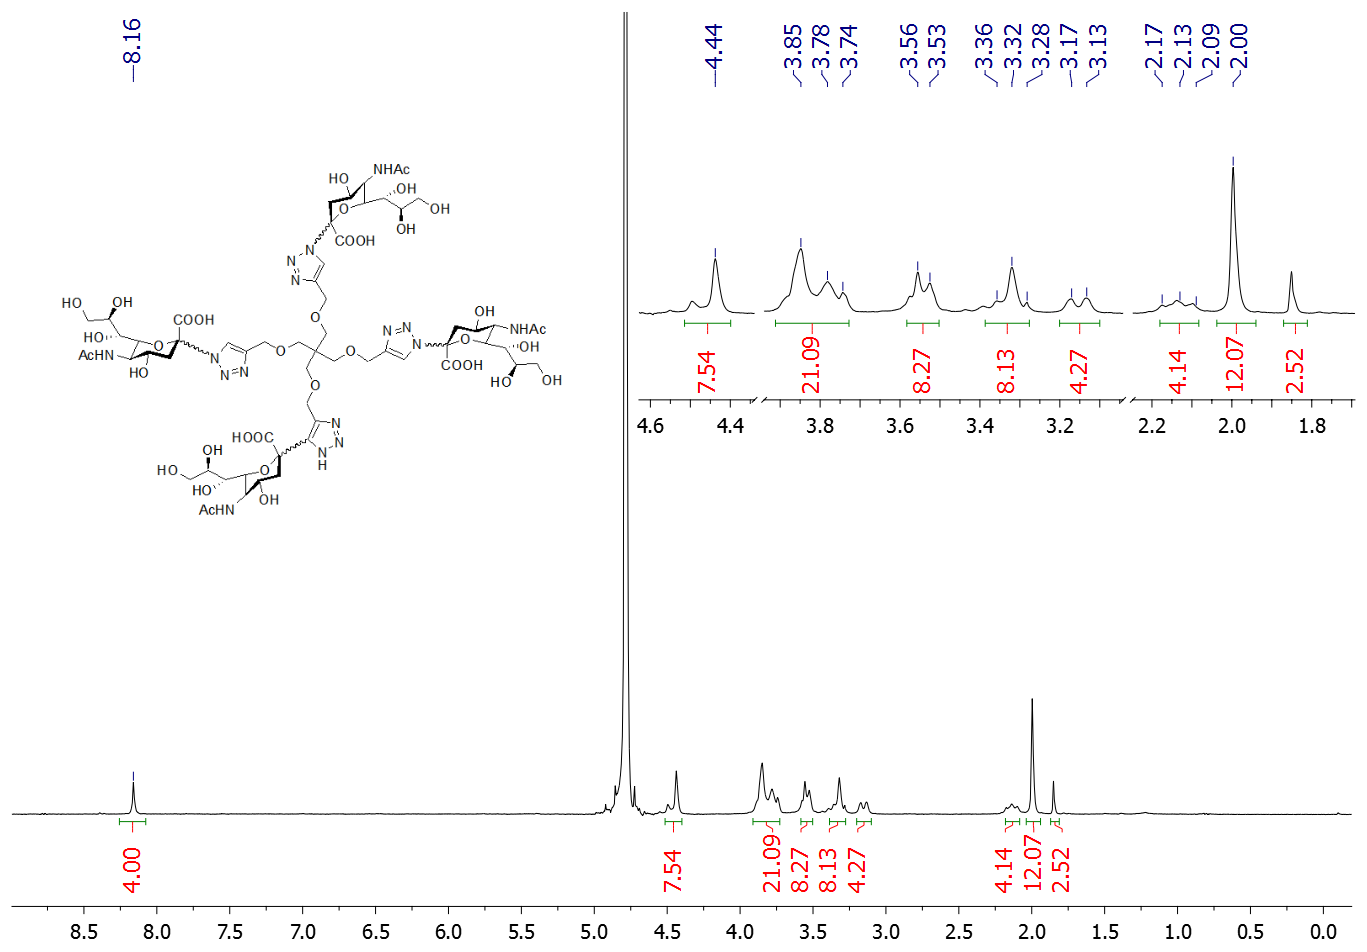


**Fig. S41.** 1H NMR (300 MHz, D2O) spectrum of glycocluster **3**.

1328.1695

1497.5160

1663.5749

1647.5749

1690.5633

1296.4703

1664.5873

148

MS, 2.5min #

+

0

1

2

3

4

5

6

5

x10

Intens.

]

[

%

600

800

1000

1200

1400

1600

1800

2000

2200

2400

m/z

**Fig. S42.** HRMS (ESI) analysis of compound **3:** *m*/*z* [M+Na]+ calculated forC61H92N15NaO36+1647.5752; found: 1647.5749.


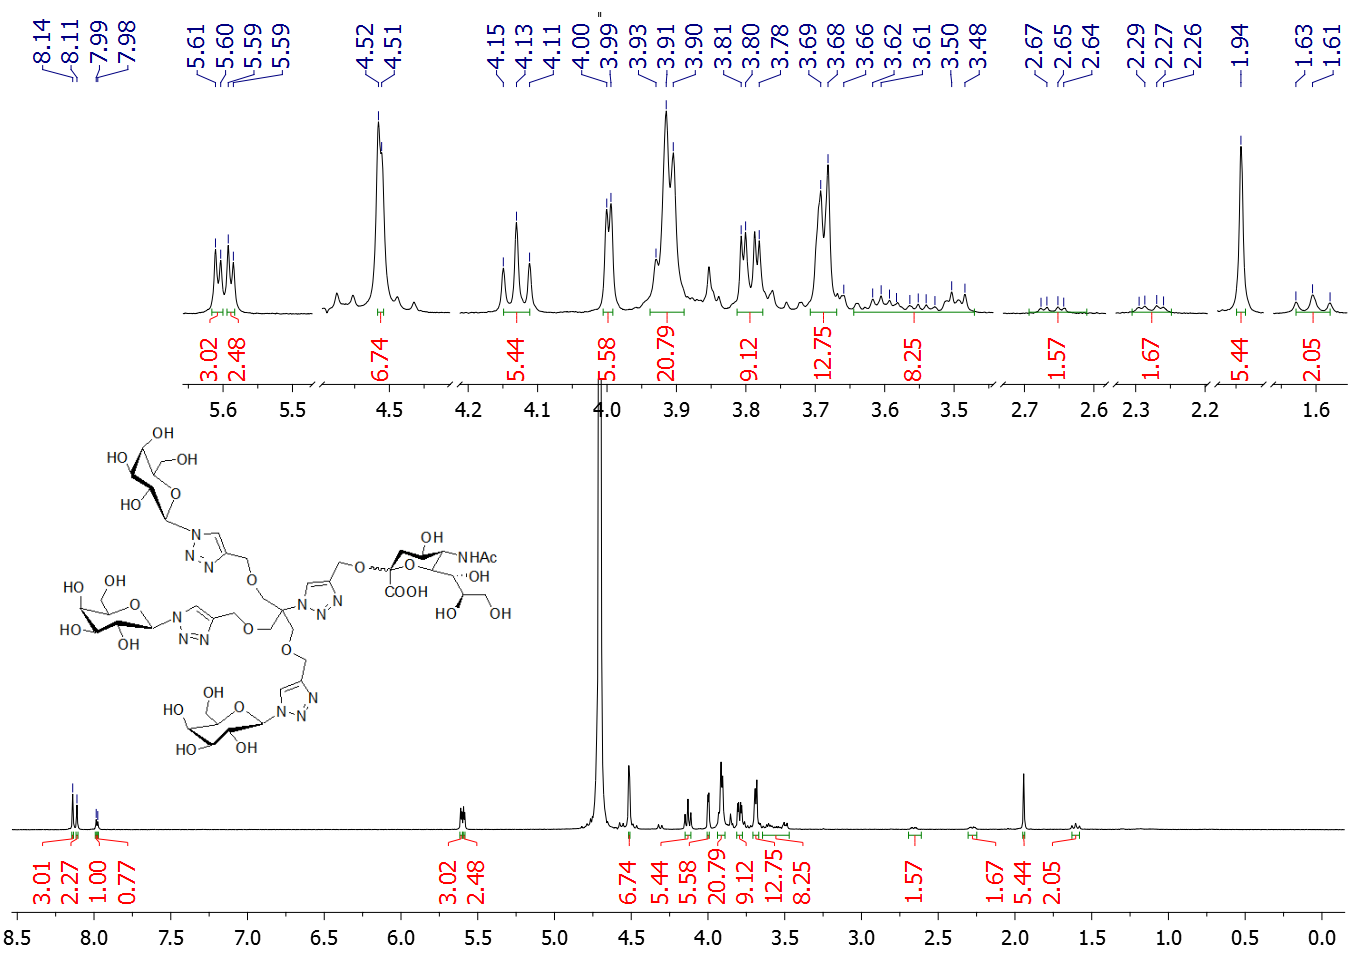


**Fig. S43.** 1H NMR (500 MHz, D­­­2O) spectrum of glycocluster **4**.


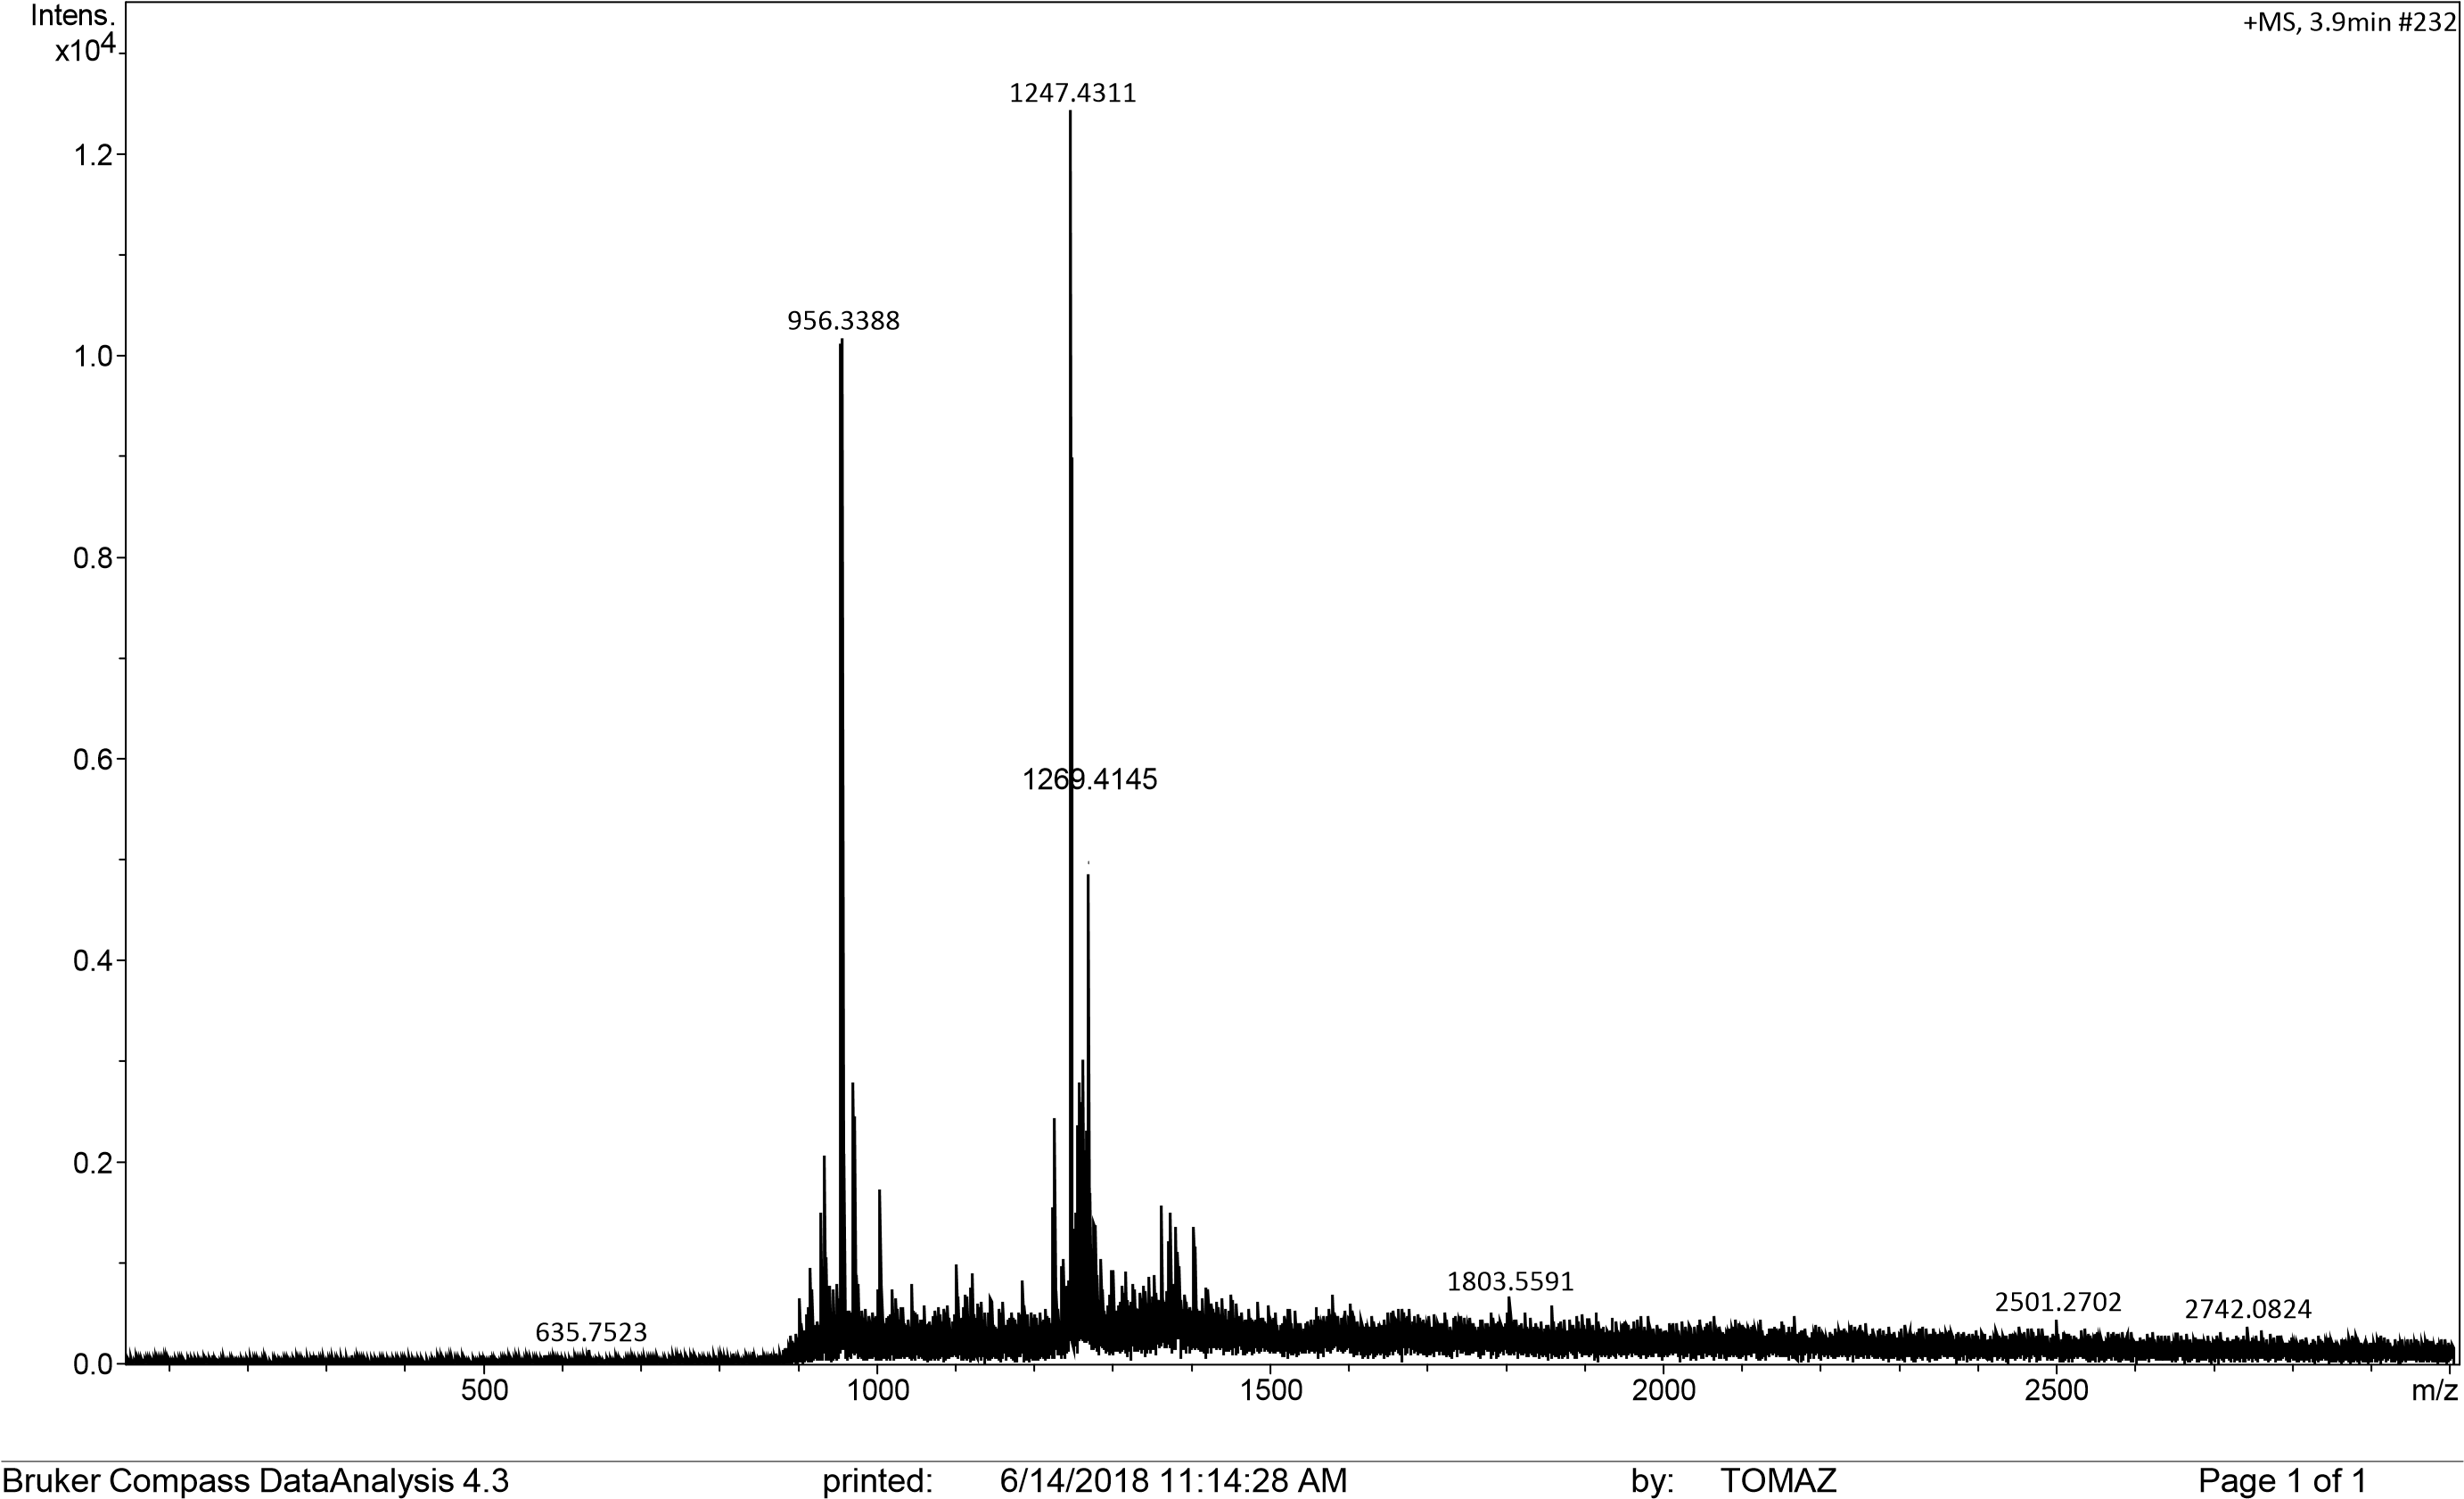


**Fig. S44.** HRMS (ESI) analysis of compound **4:** *m*/*z*[M+H+Na]+ calculated for C45H70N13NaO272+1247.4391; found: 1247.4311.


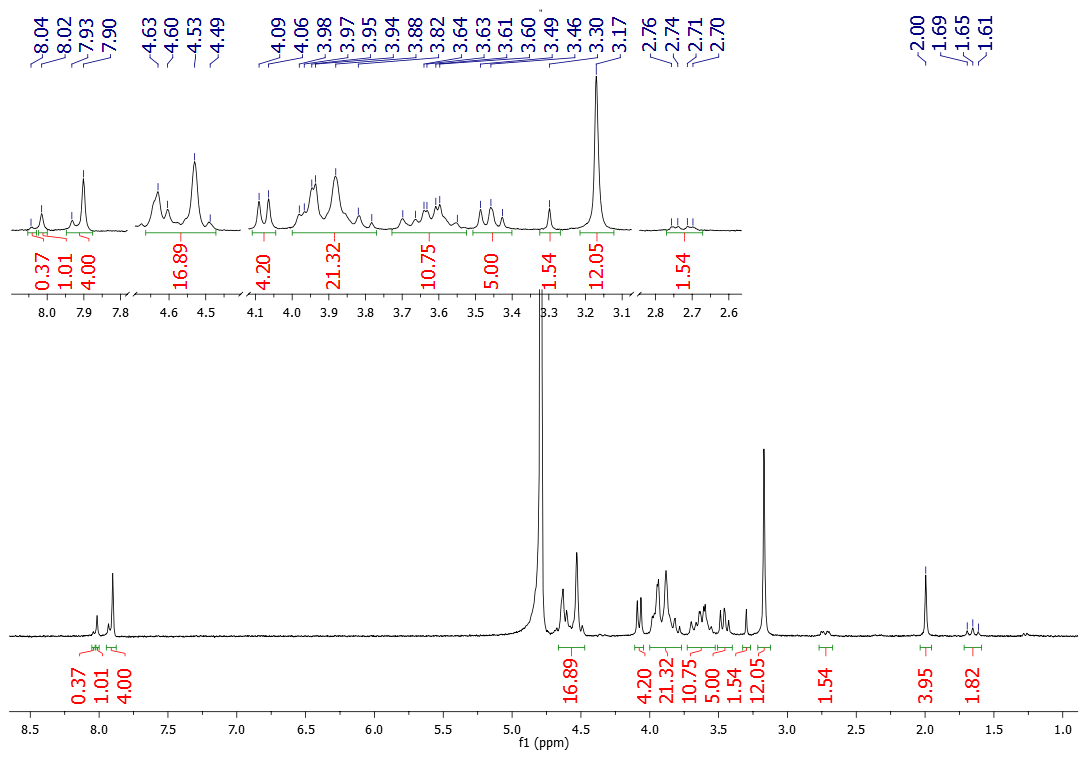


**Fig. S45.** 1H NMR (300 MHz, D2O) spectrum of glycocluster **5**.


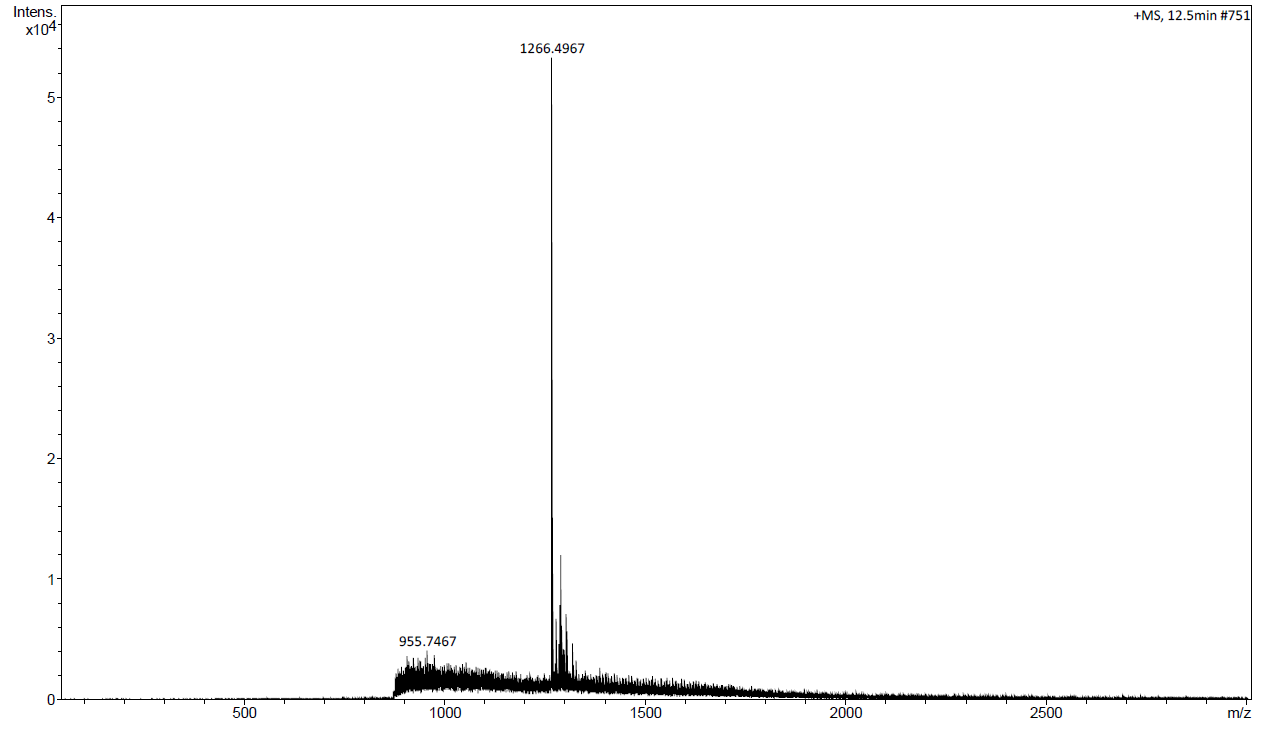


**Fig. S46.** ESI MS analysis of glycocluster **5**: *m*/*z*[M+Na]+ calculated for C48H76N13O27+ 1266.4968; found: 1266.4968.
